# Supplementary material for: Micronutrient fortification of food and its impact on woman and child health: a systematic review
Source: PubMed Central journal article supplement (PMC3765883; doi:10.1186/2046-4053-2-67), 2013-08-23

Figure S1 Forest plot: Effect of Iron fortification on serum hemoglobin levels in children

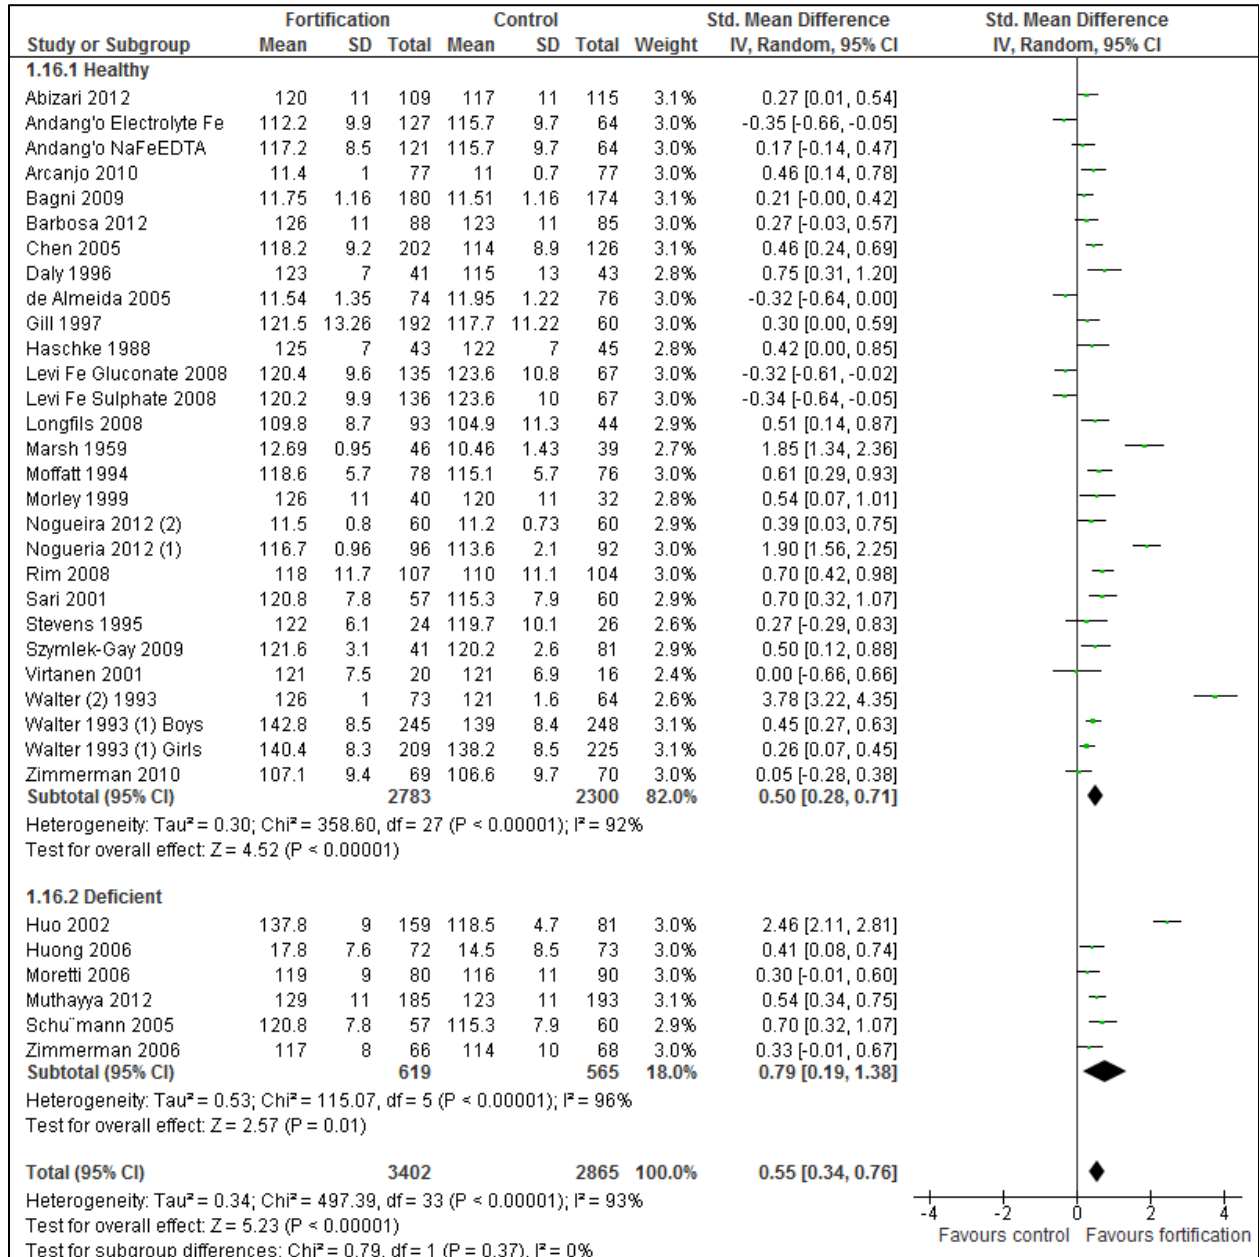

Figure S2 Effect of Iron fortifications on anemia prevalence in children

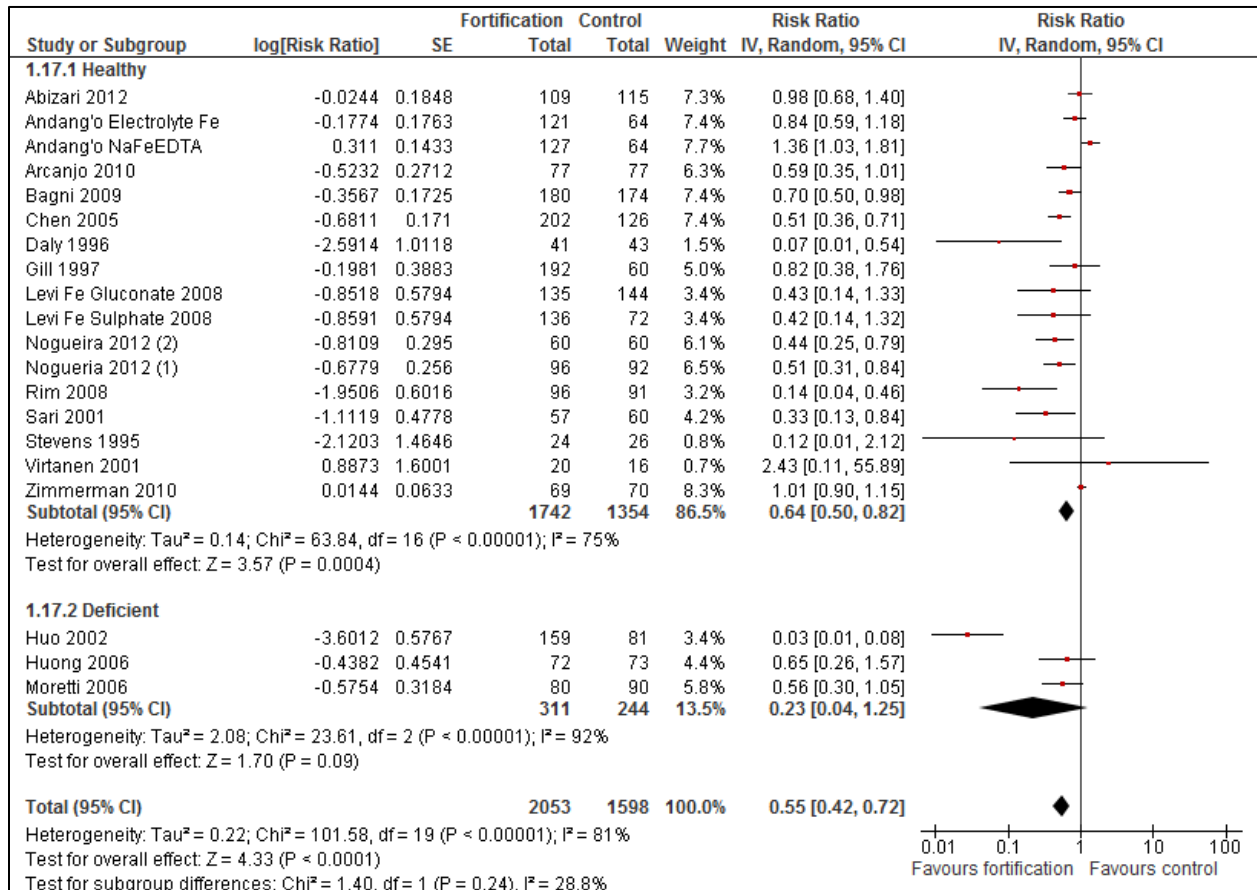

Figure S3 Effect of Iron fortification on serum ferritin levels in children

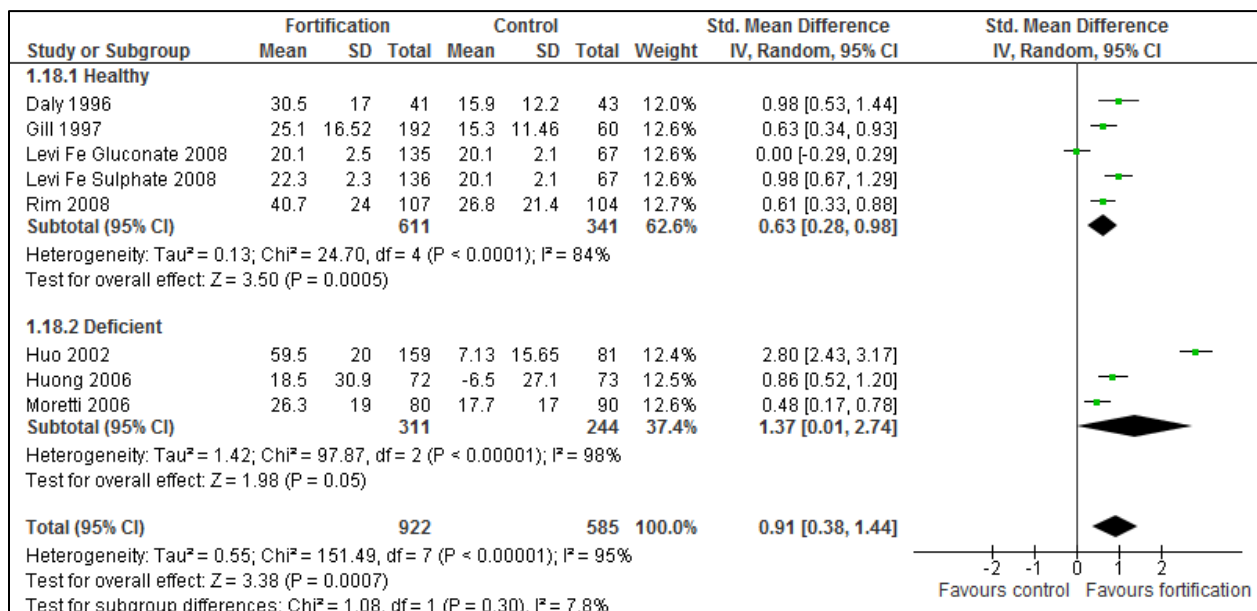

Figure S4 Effect of zinc fortification on serum zinc levels in children

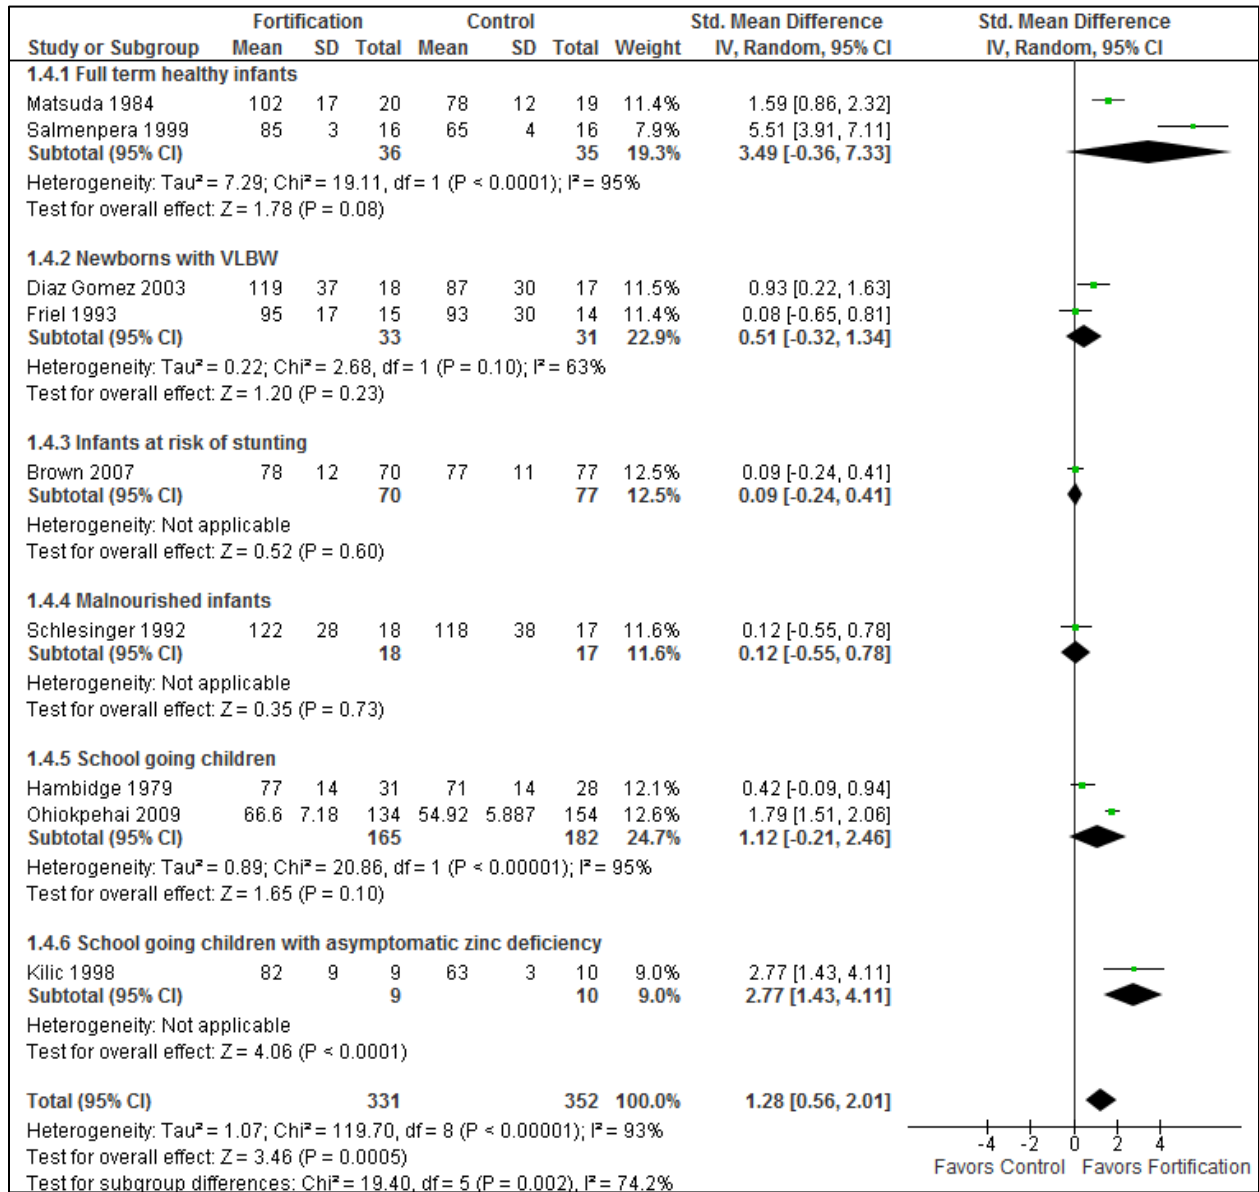

Figure S5 Effect of zinc fortification on height gain in children

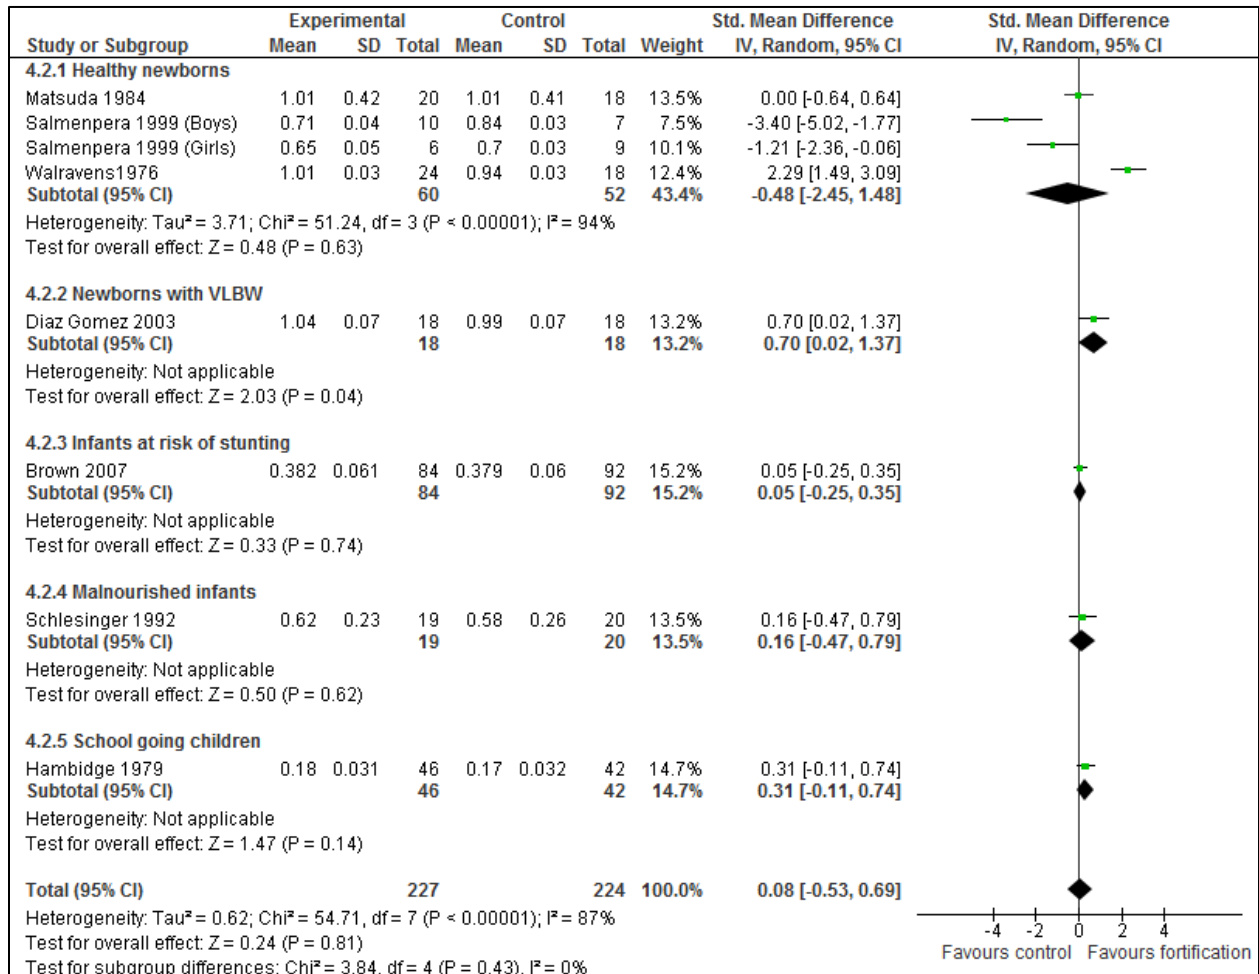

Figure S6 Effect of zinc fortification on weight gain in children

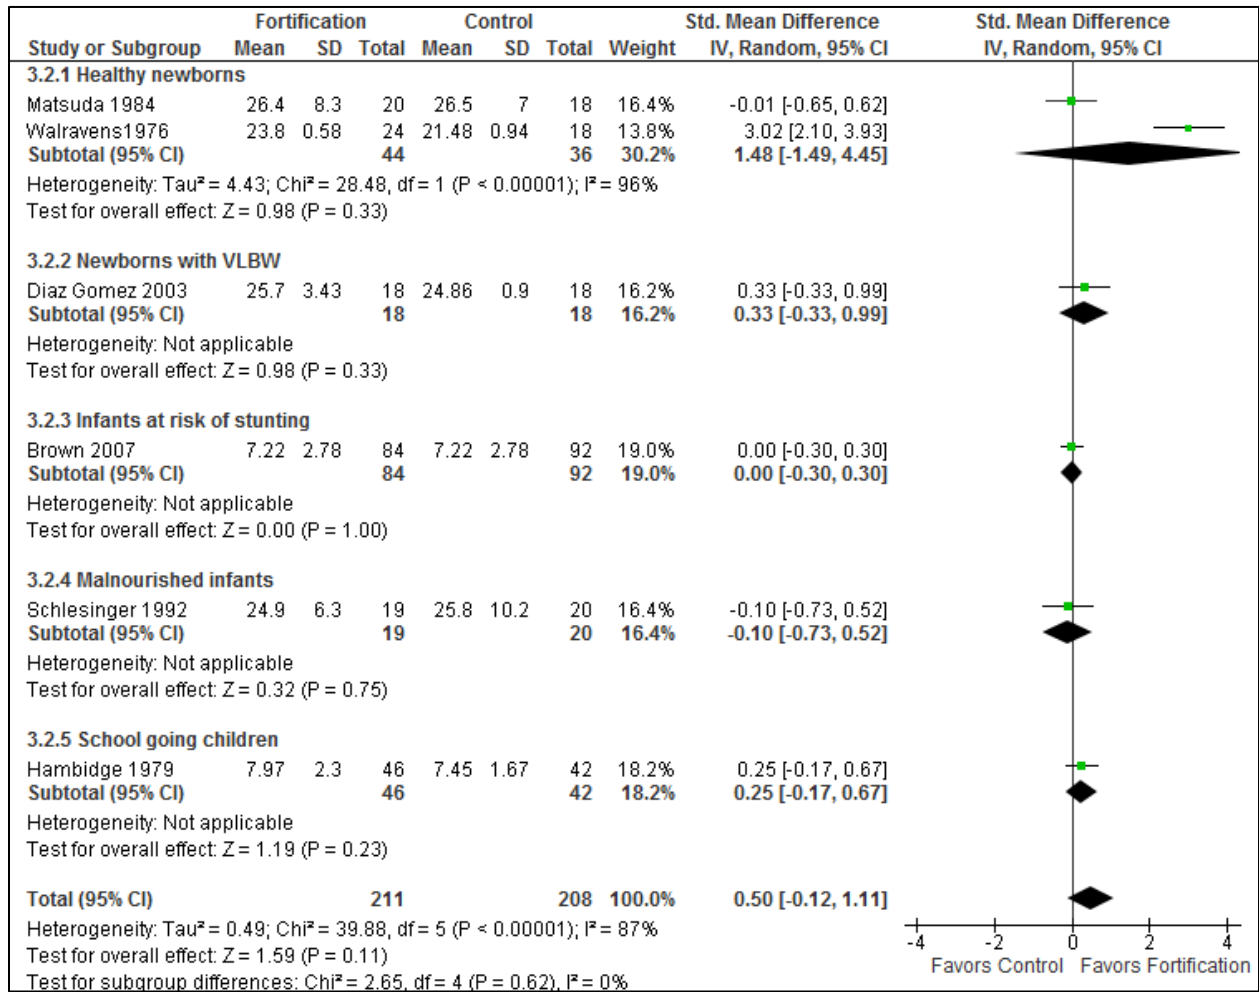

Figure S7 Effect of zinc fortification on serum hemoglobin levels in children

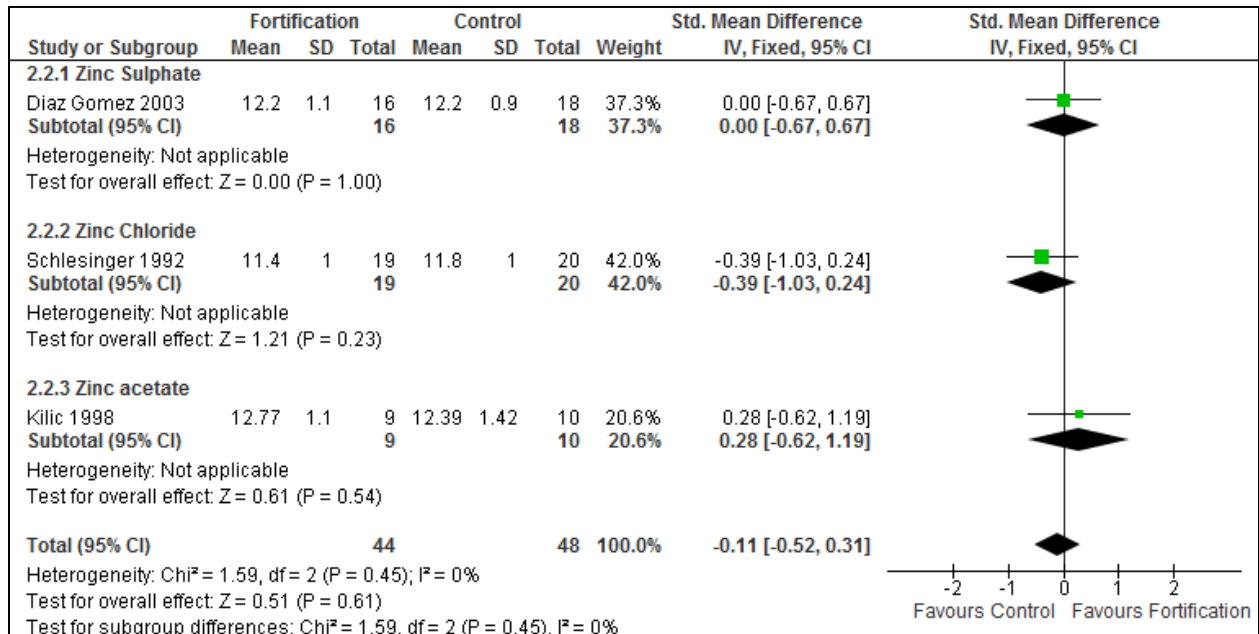

Figure S8 Effect of zinc fortification on serum copper levels in children

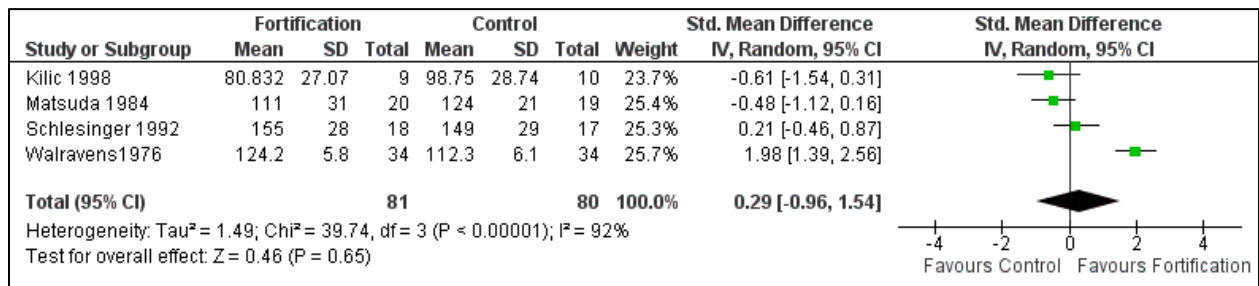

Figure S9 Effect of vitamin D and calcium fortification on serum vitamin D levels in children

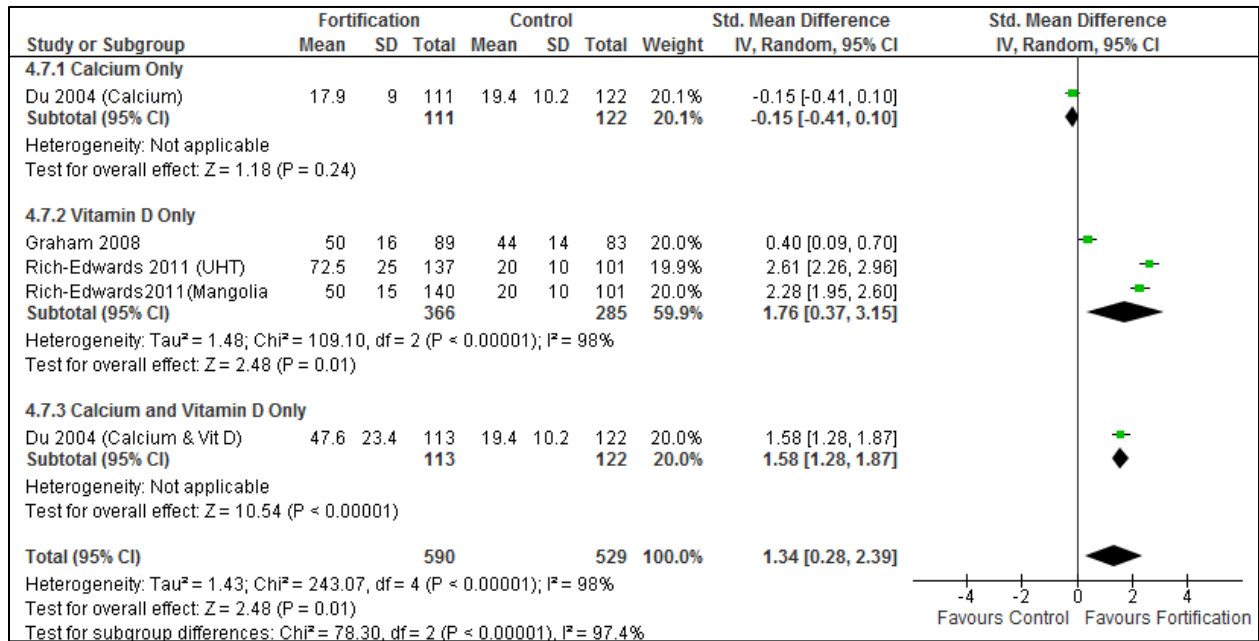

Figure S10 Effect of vitamin D and calcium fortification on serum PTH levels in children

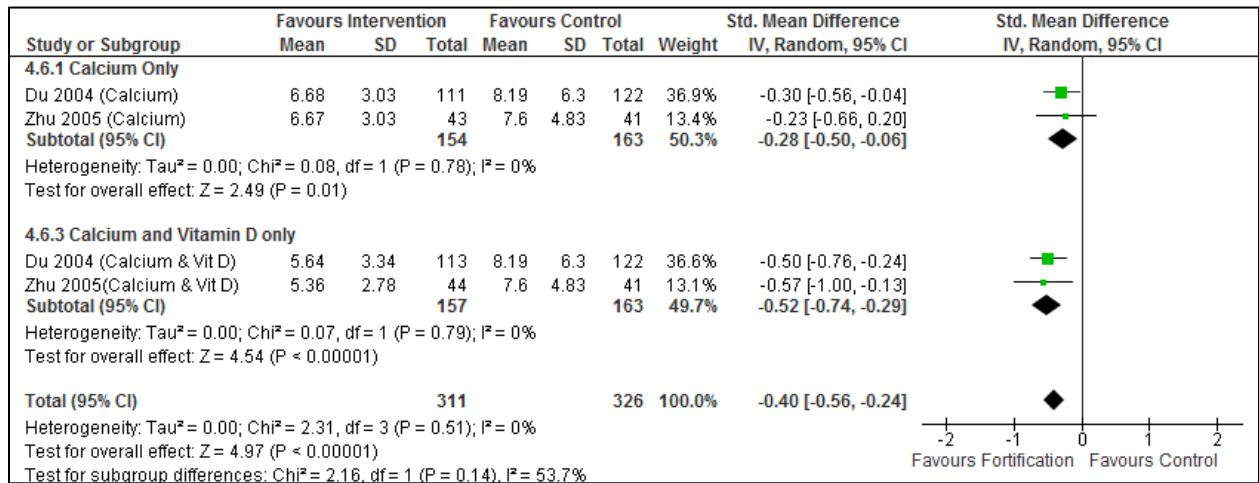

Figure S11 Effect of vitamin D and calcium fortification on serum calcium levels in children

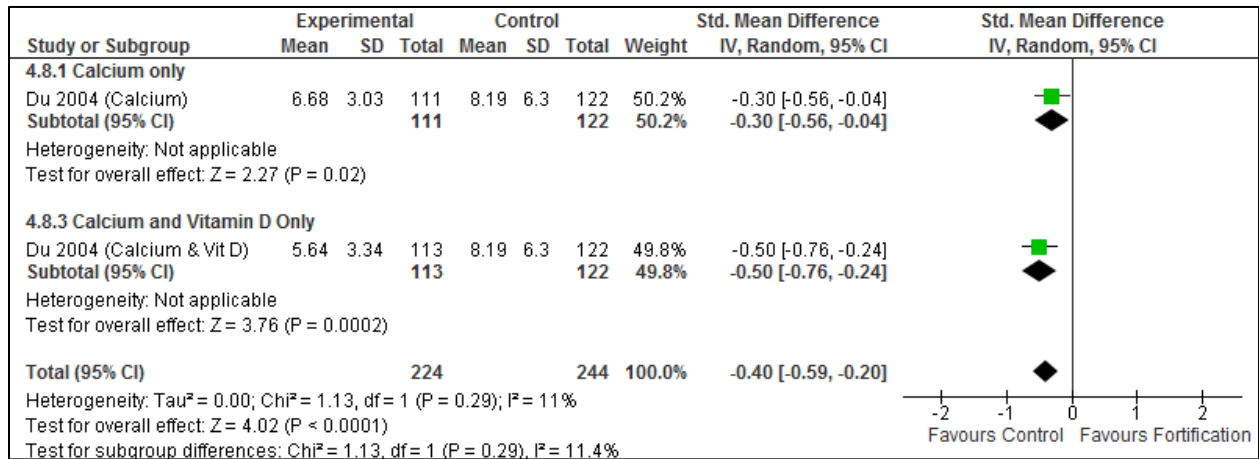

Figure S12 Effect of Vitamin A fortification on serum retinol concentration in children

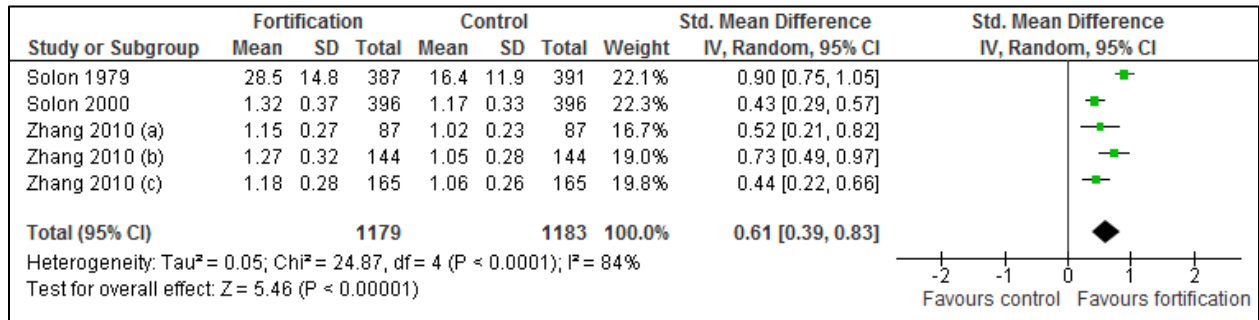

Figure S13 Effect of Vitamin A fortification on Vitamin A deficiency in children

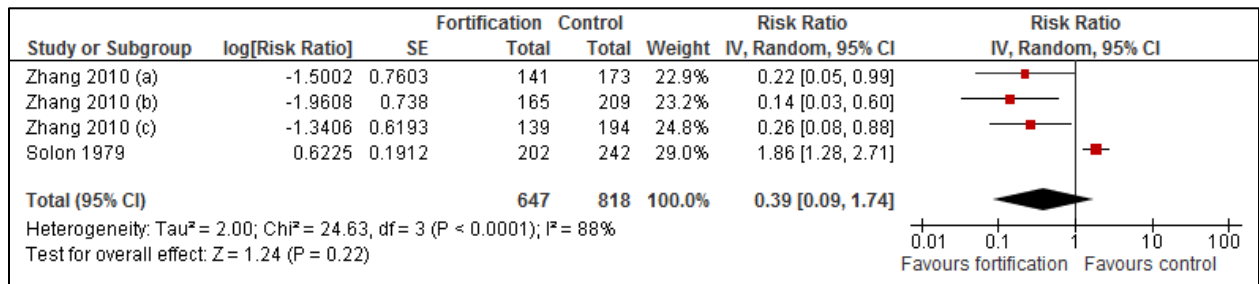



Figure 14 Effect of Vitamin A fortification on serum hemoglobin levels in children

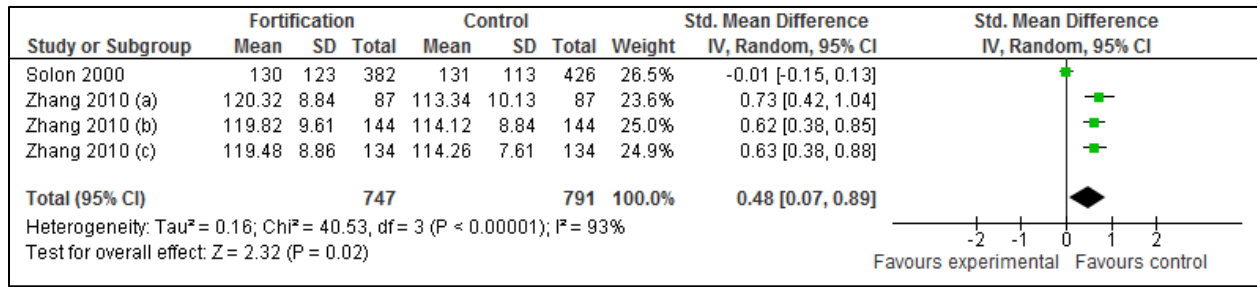

Figure S15 Effect of iodine fortification on urinary iodine concentration in children

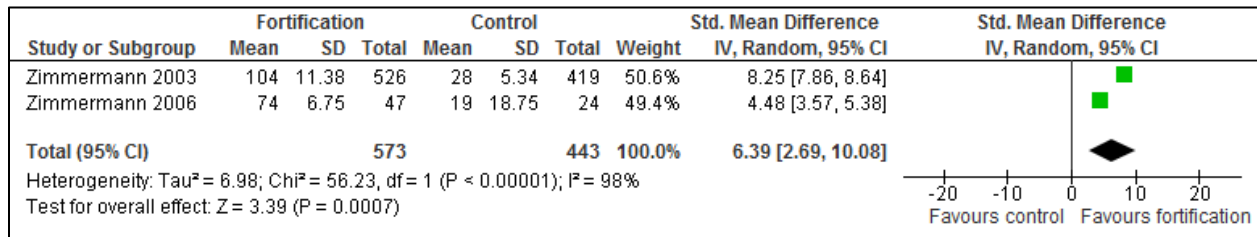

Figure S16 Effect of iodine fortification on serum thyroxin levels in children

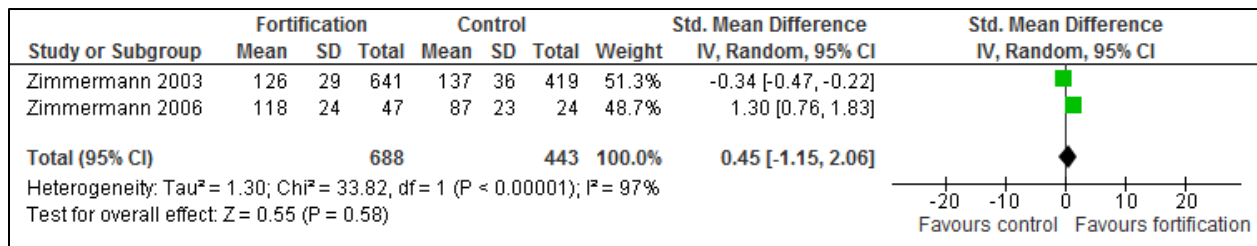

Figure S17 Effect of MMN fortification on serum hemoglobin levels in children

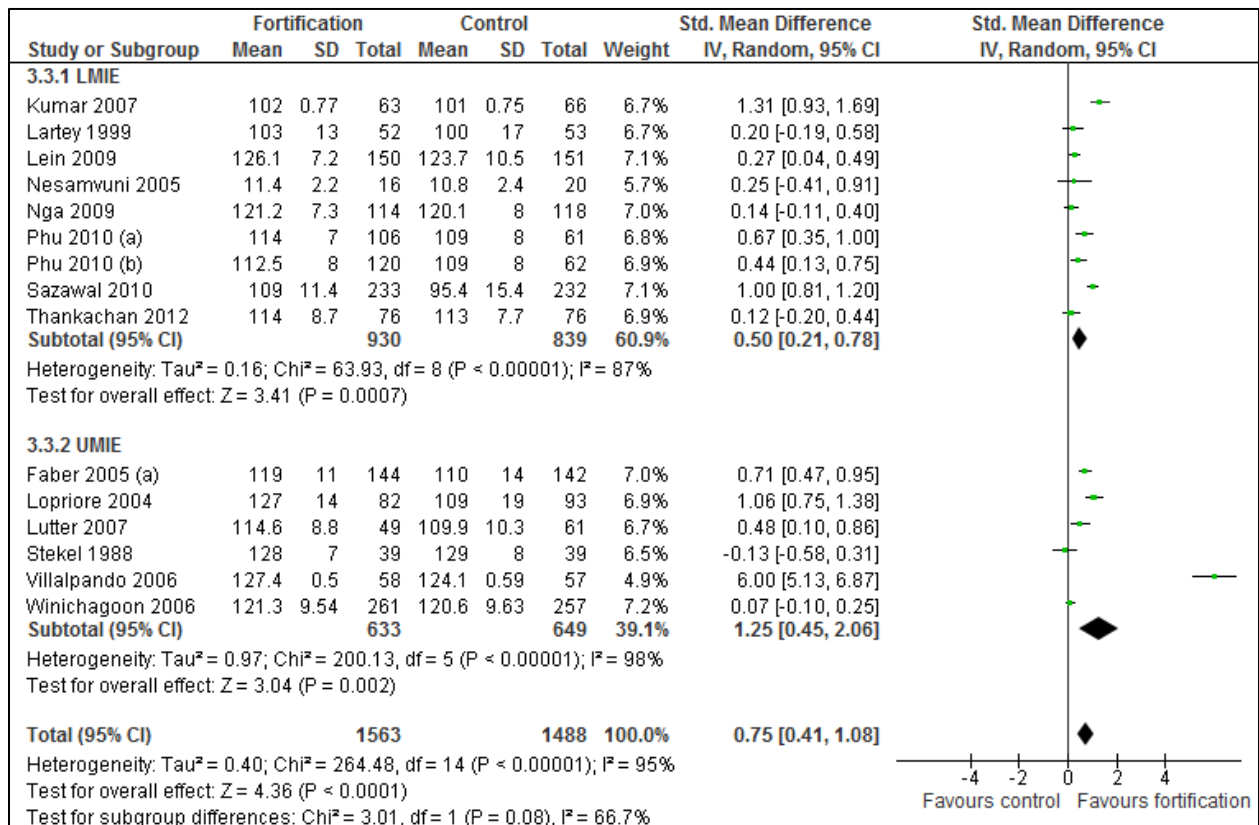

Figure S18 Effect of MMN fortification on serum ferritin levels in children

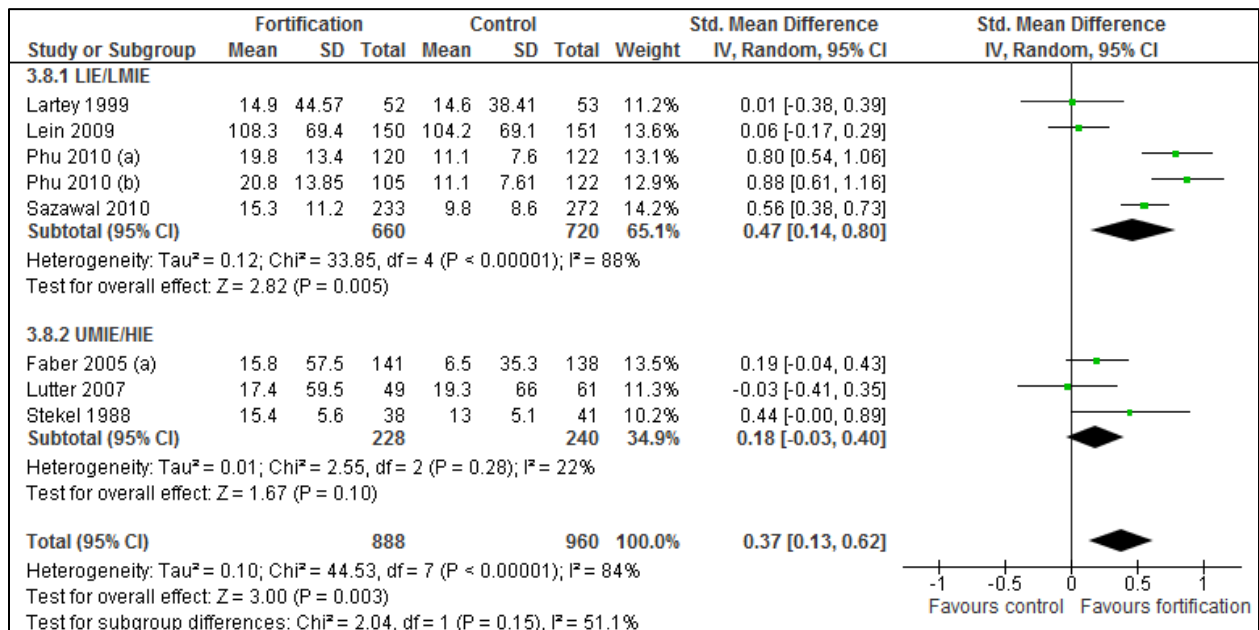

Figure S19 Effect of MMN fortification on serum zinc levels in children

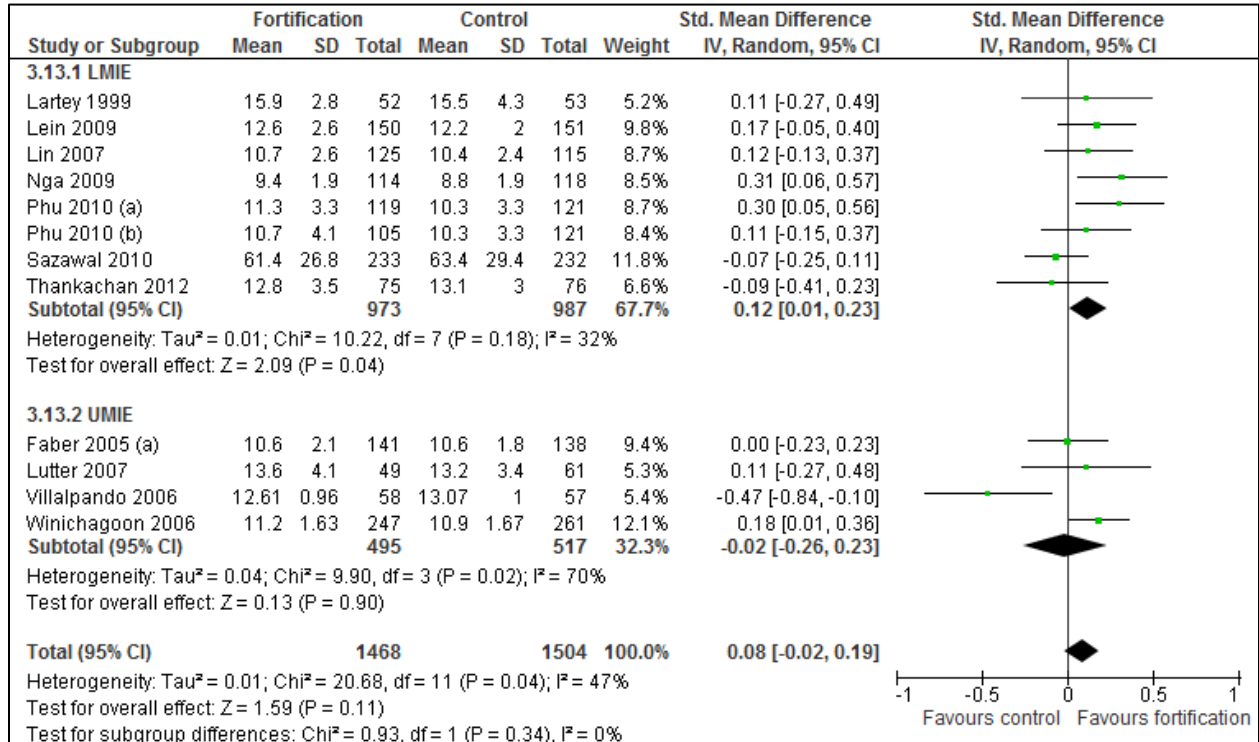

Figure S20 Effect of MMN fortification on serum retinol levels in children

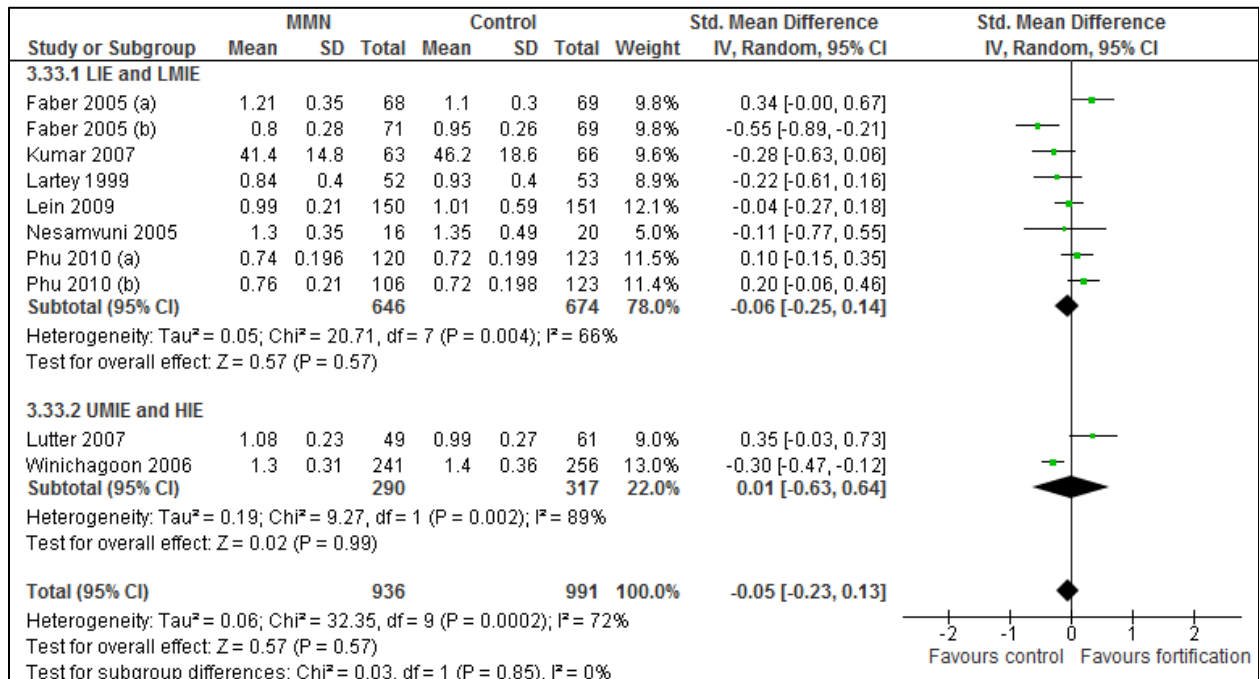

Figure S21 Effect of MMN fortification of vitamin A deficiency in children

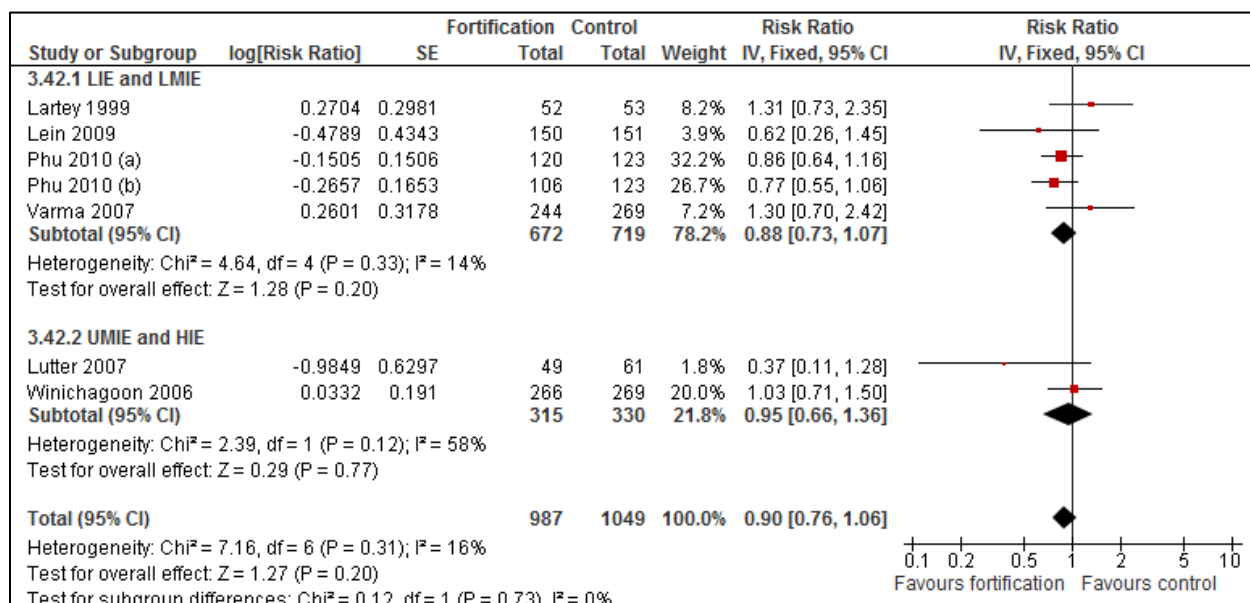

Figure S22 Effect of MMN fortification on anemia

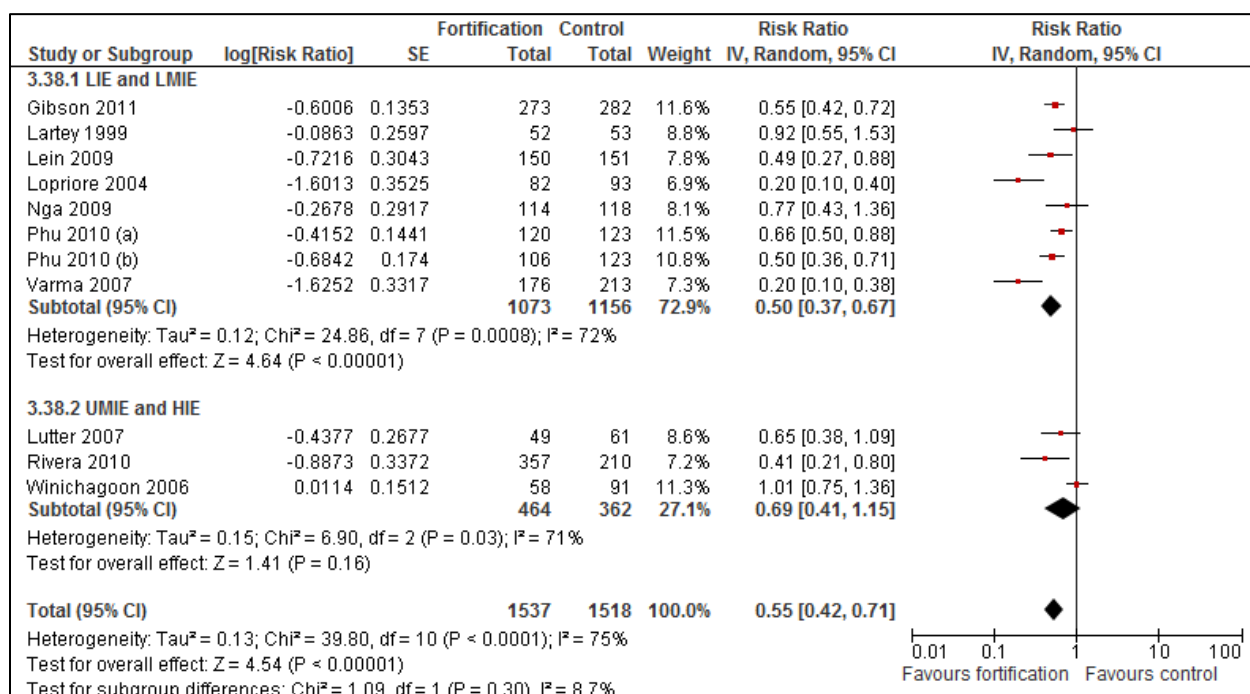

Figure S23 Effect of MMN fortification on Height-for-age Z Score in children

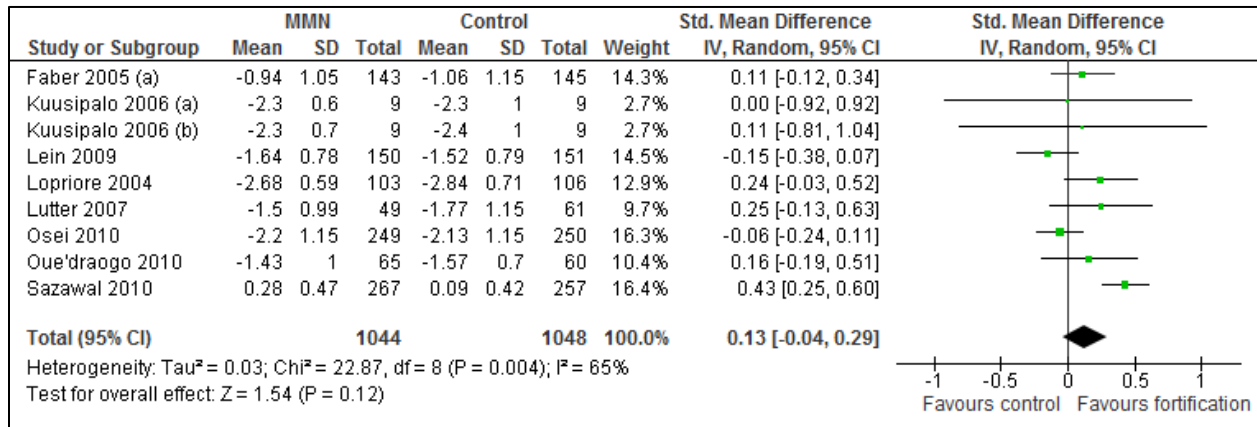

Figure S24 Effect of MMN fortification on Weight-for-age Z Score in children

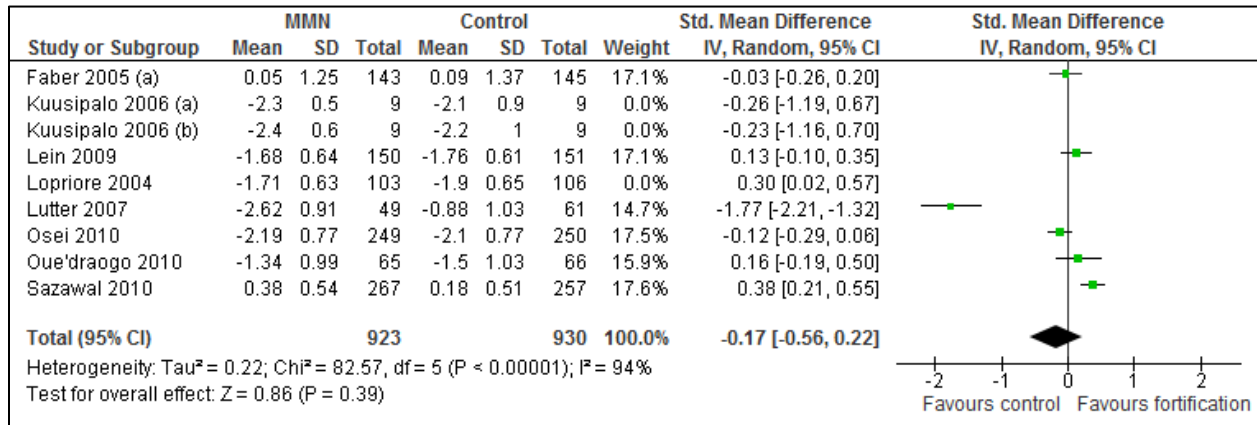

Figure S25 Effect of MMN fortification on Weight-for-Height Z Score in children

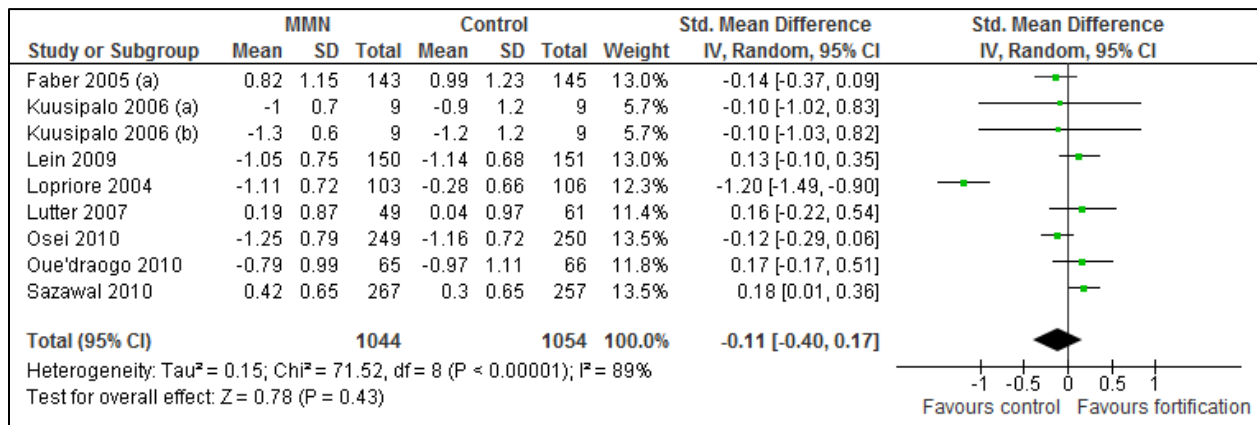

Figure S26 Effect of MMN fortification on Morbidities in children

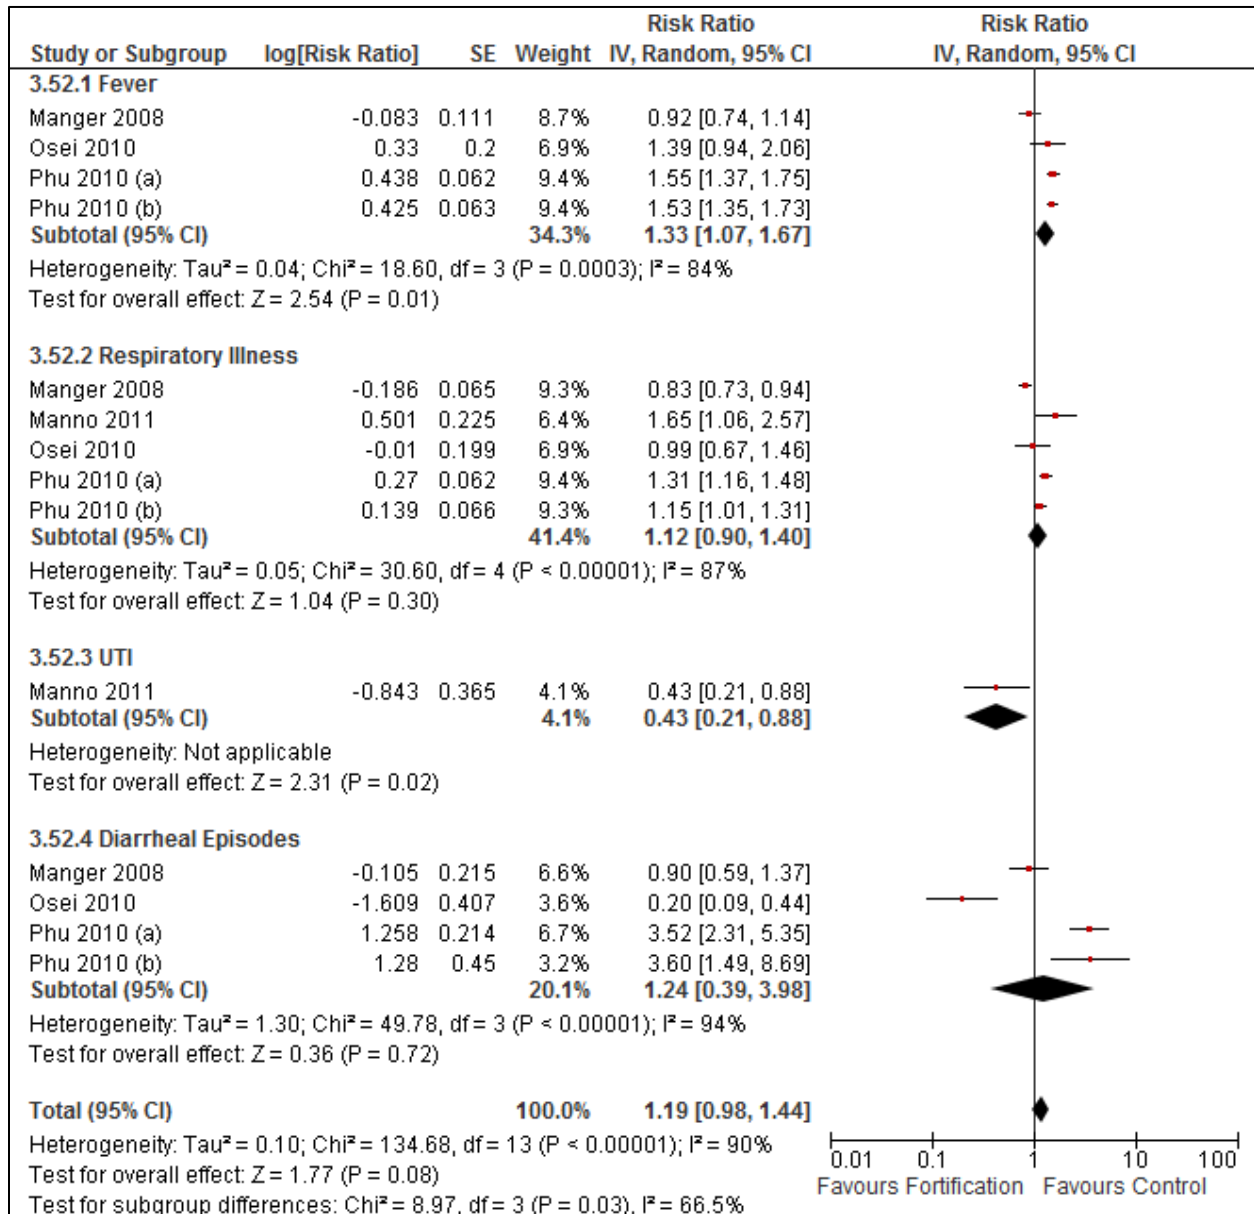

Figure S27 Effect of iron fortification on serum hemoglobin levels in women

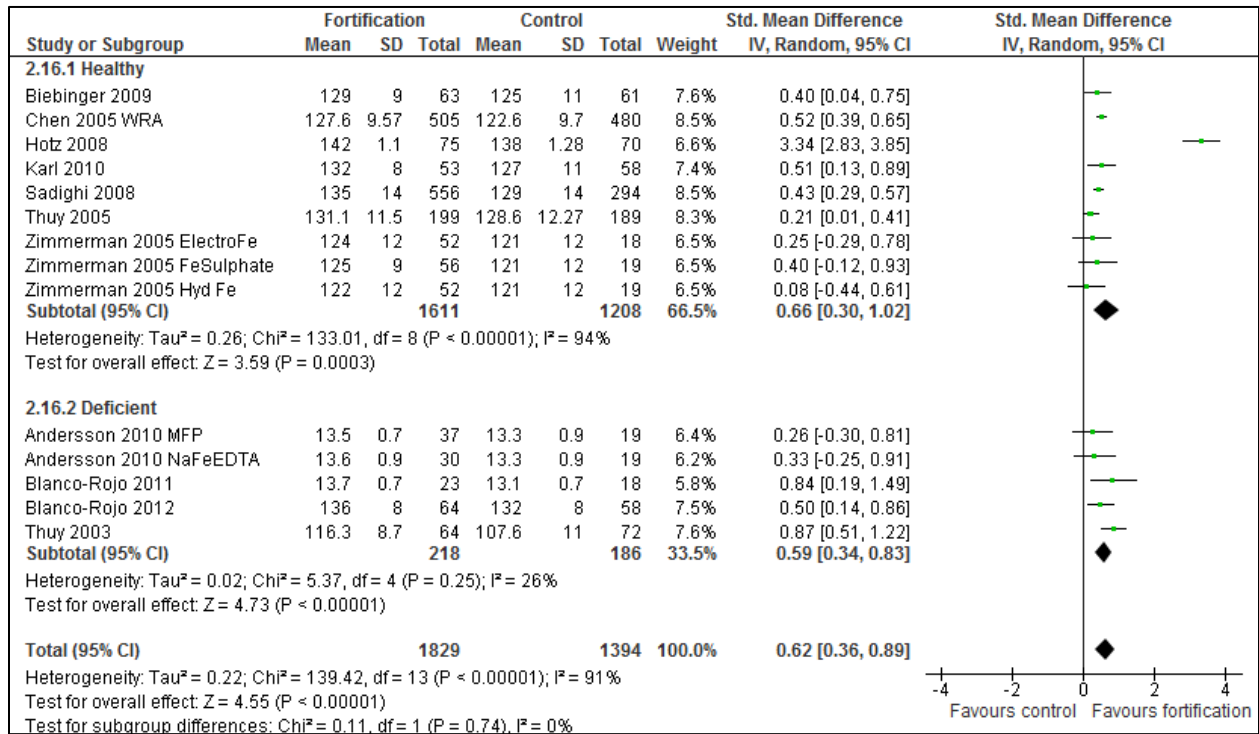

Figure S28 Effect of iron fortification on anemia prevalence in women

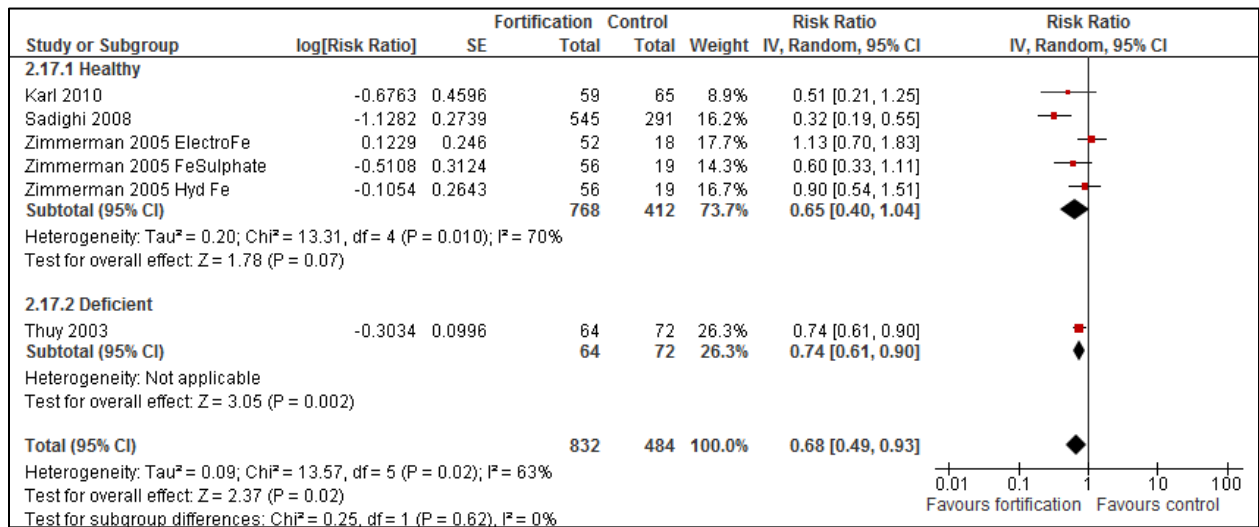

Figure S29 Effect of iron fortification on serum ferritin levels in women

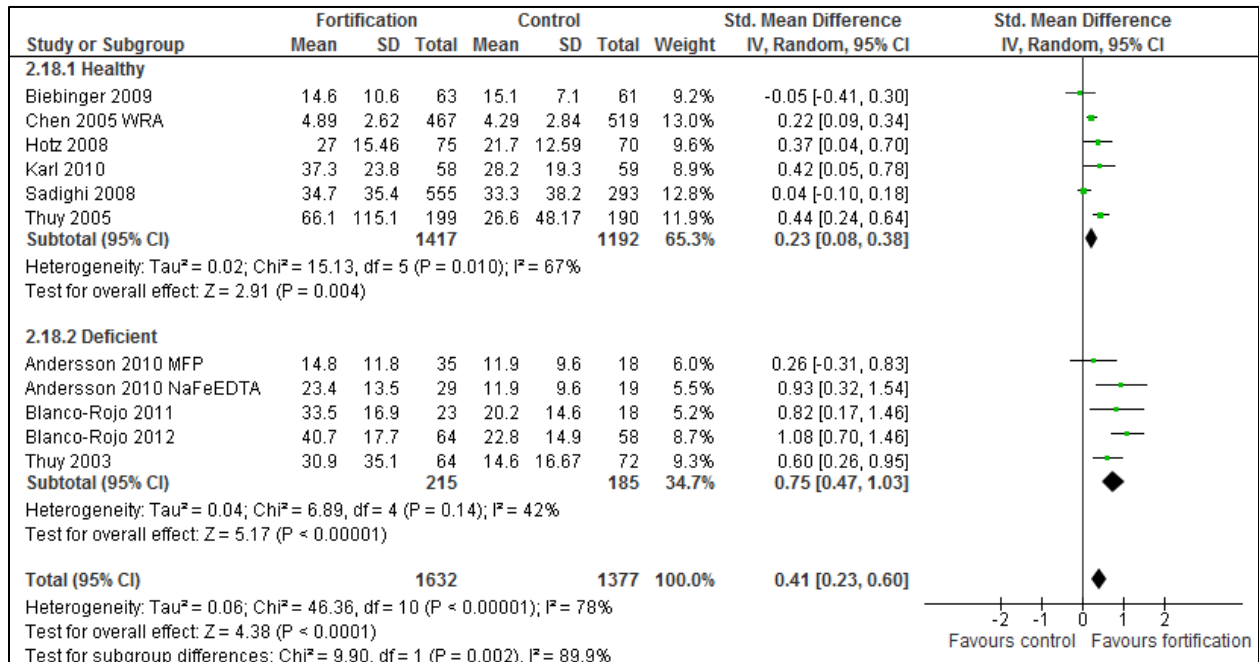

Figure S30 Effect of folate fortification on neural tube defects

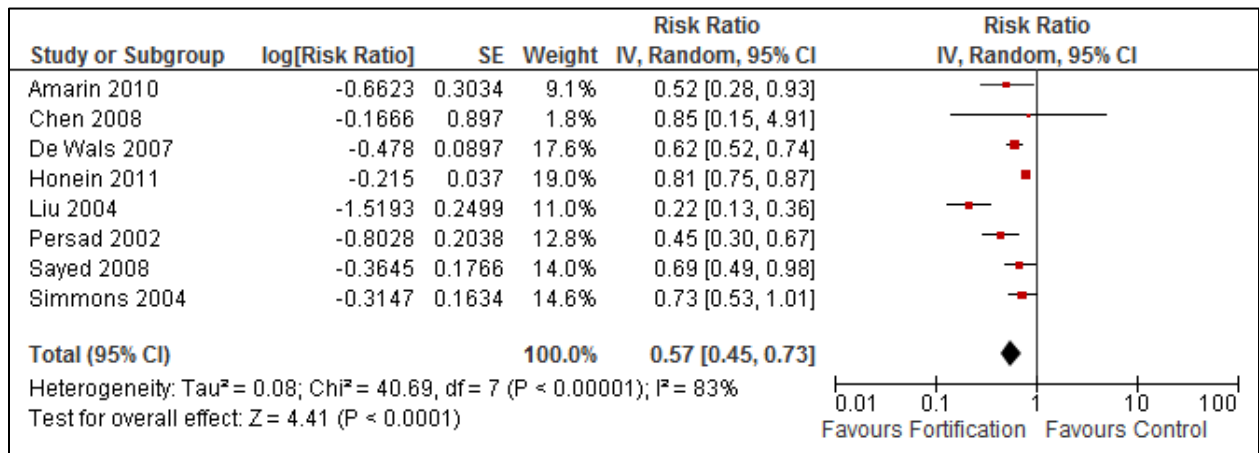



Figure S31 Effect of folate fortification on Spina Bifida

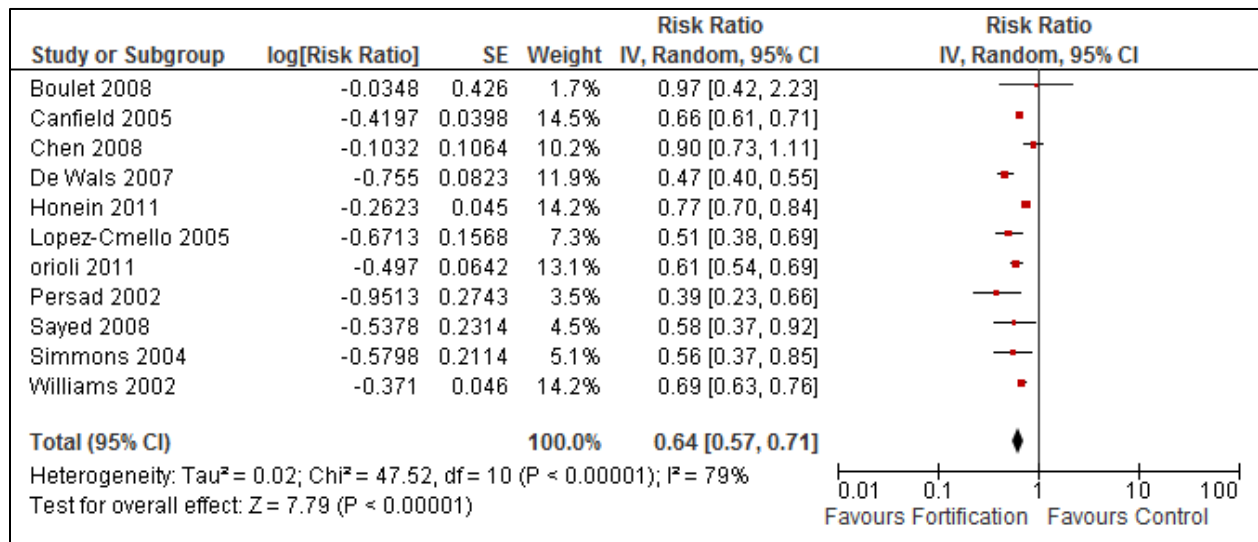

Figure S32 Effect of folate fortification on anencephaly

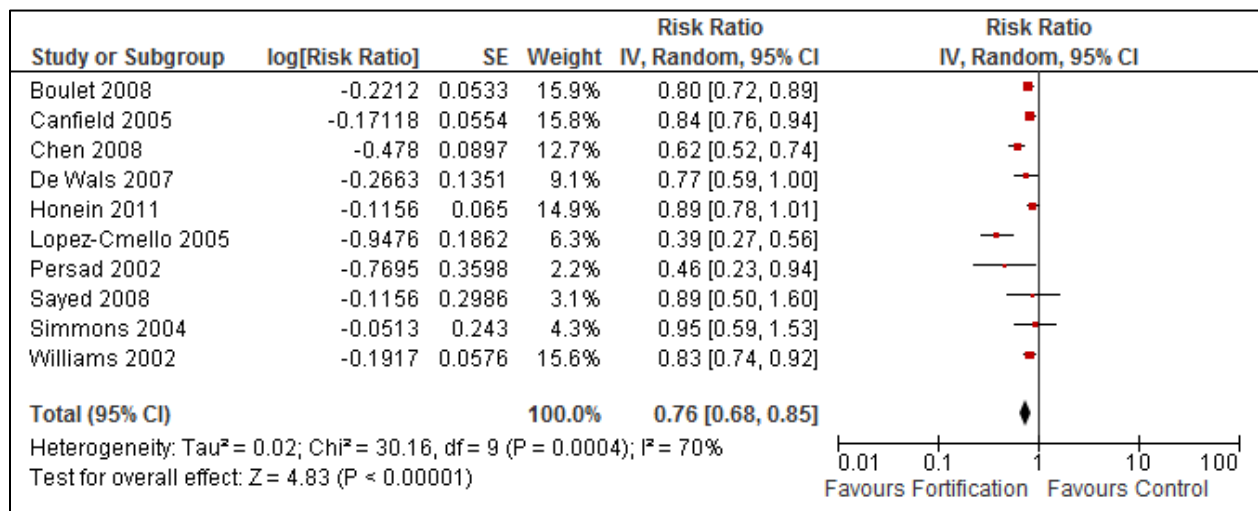

Figure S33 Effect of folate fortification on twinning

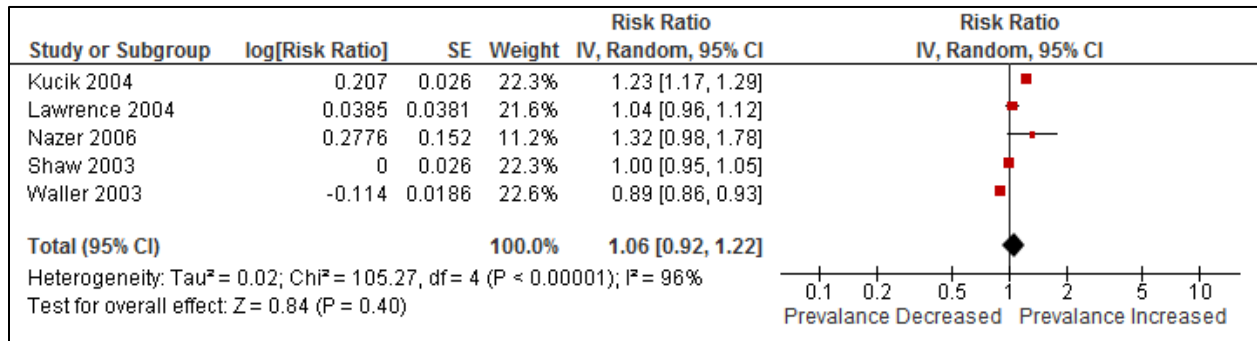

Figure S34 Effect of folate fortification on serum folate levels

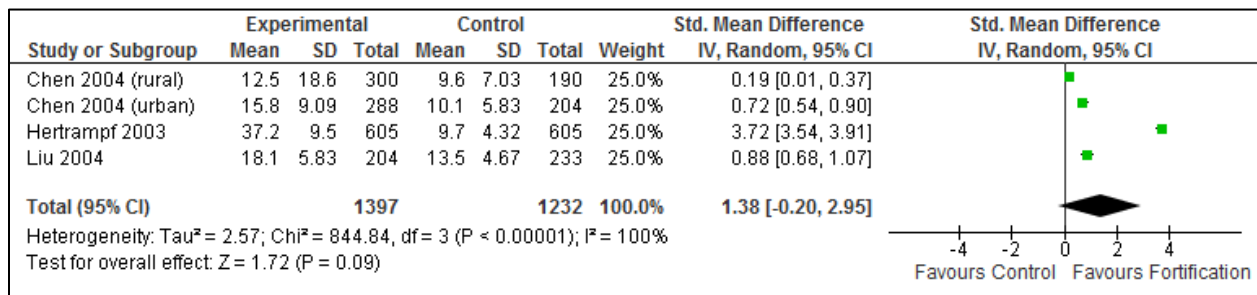

Figure S35 Effect of folate fortification on RBC folate levels

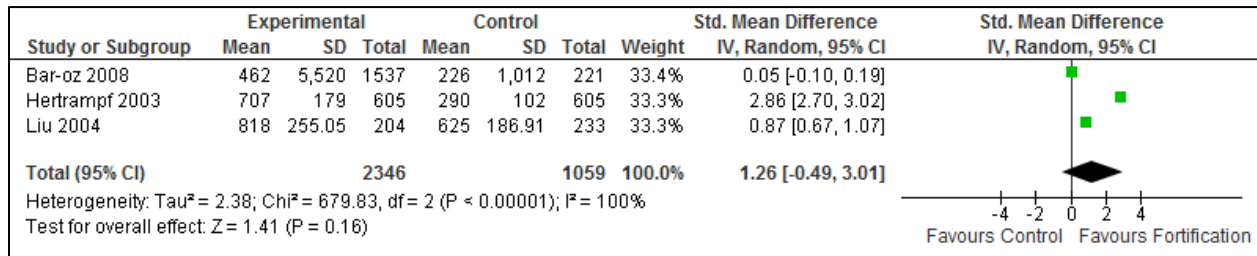

Figure S36 Effect of folate fortification on folate deficiency

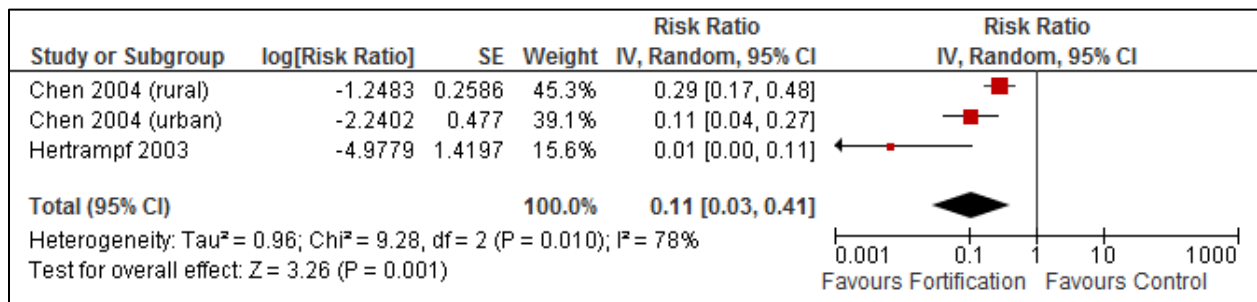

Figure S37 Effect of iodine fortification on urinary iodine concentration in women

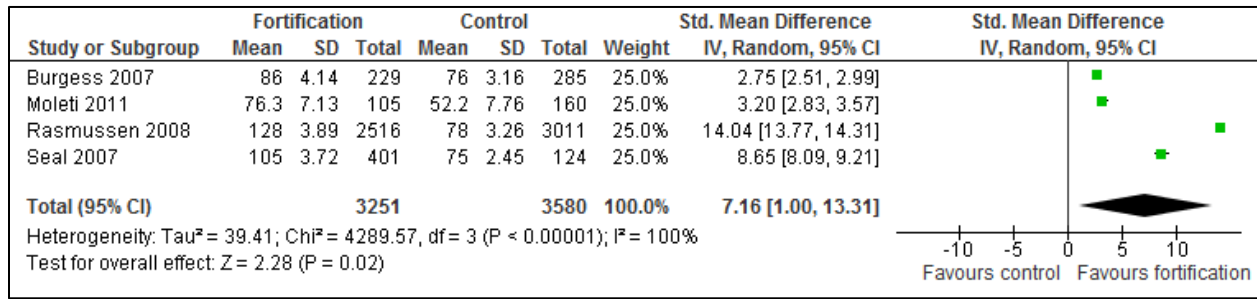

Figure S38 Effect of Iodine fortification on Hypothyroidism in women

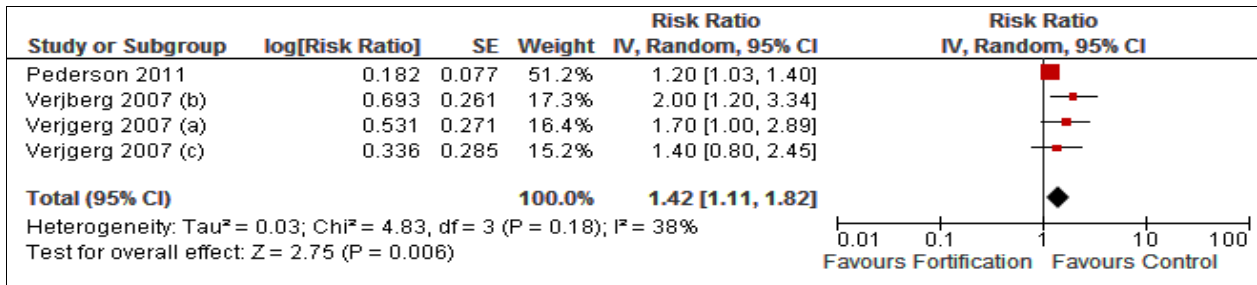

Figure S39 Effect of vitamin D and calcium fortification on serum vitamin D levels in post-menopausal women

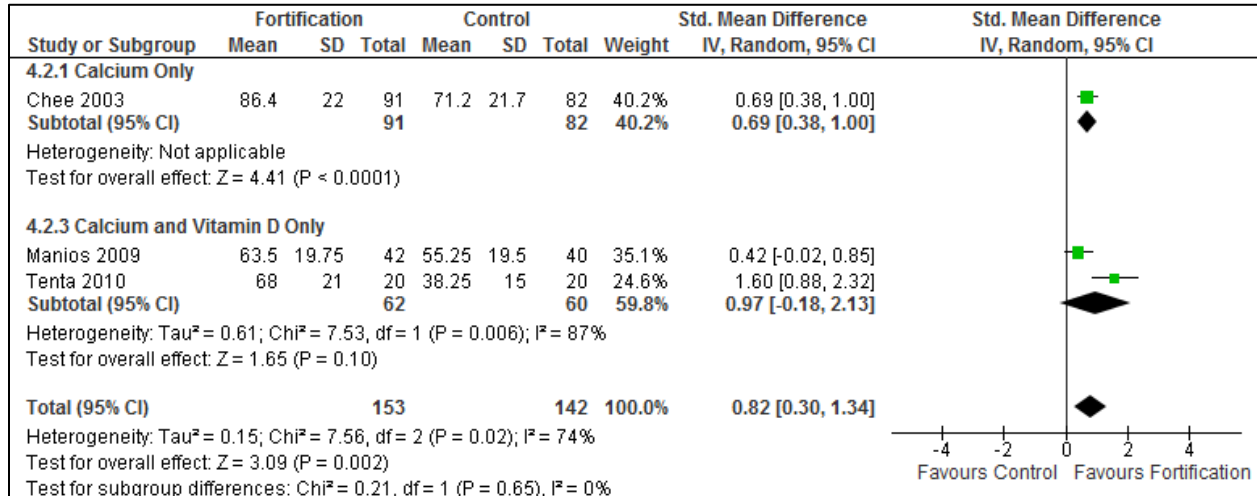

Figure S40 Effect of vitamin D and calcium fortification on serum vitamin D levels in women of reproductive age group

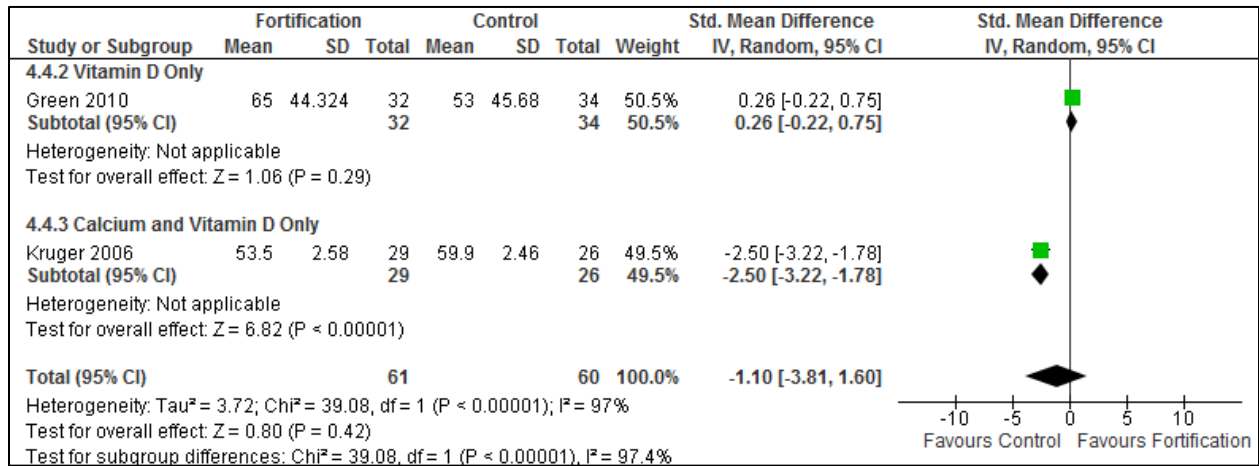

Figure S41 Effect of vitamin D and calcium fortification on serum PTH levels in post-menopausal women

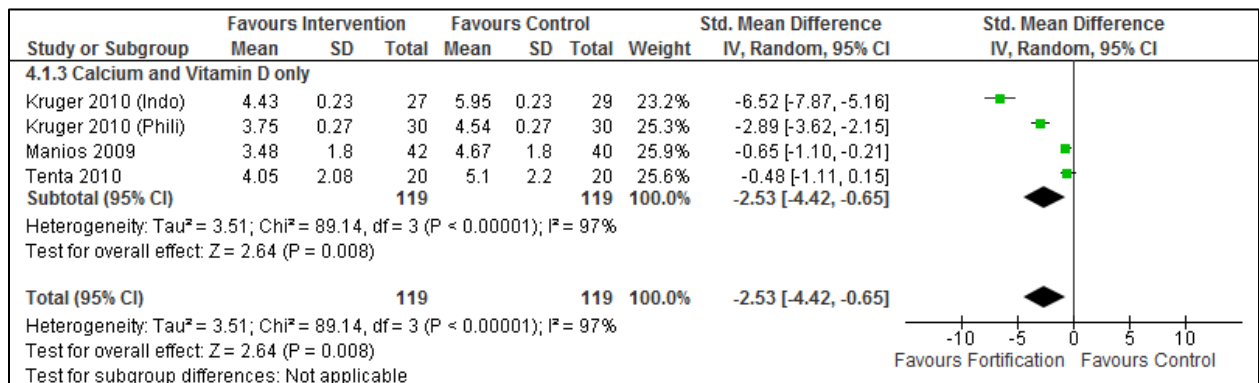

Figure S42 Effect of vitamin D and calcium fortification on serum PTH levels in women of reproductive age

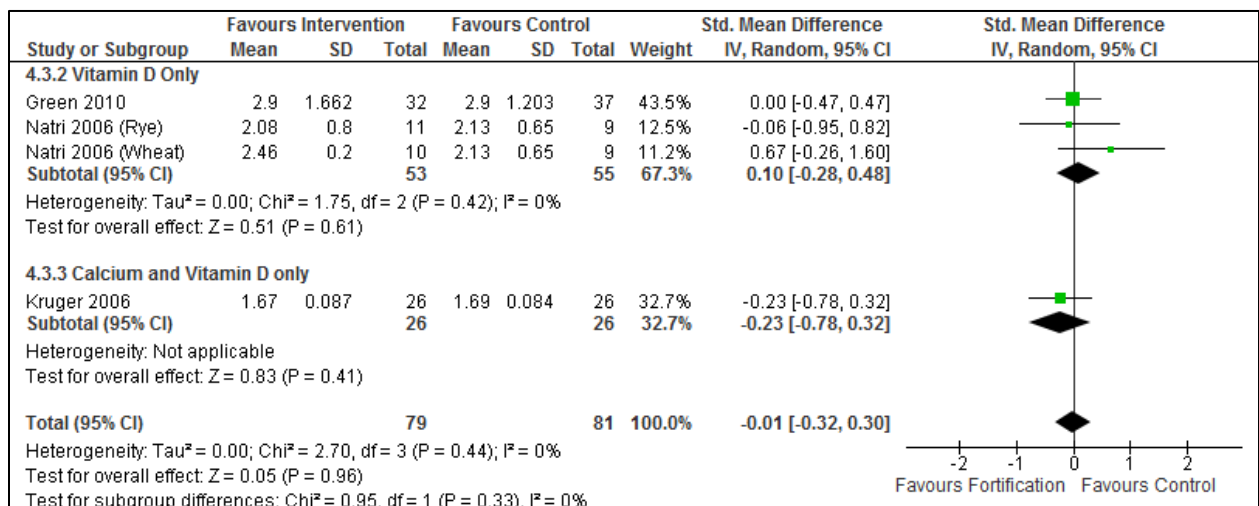

Figure S43 Effect of vitamin D and calcium fortification on serum calcium levels in women of reproductive age

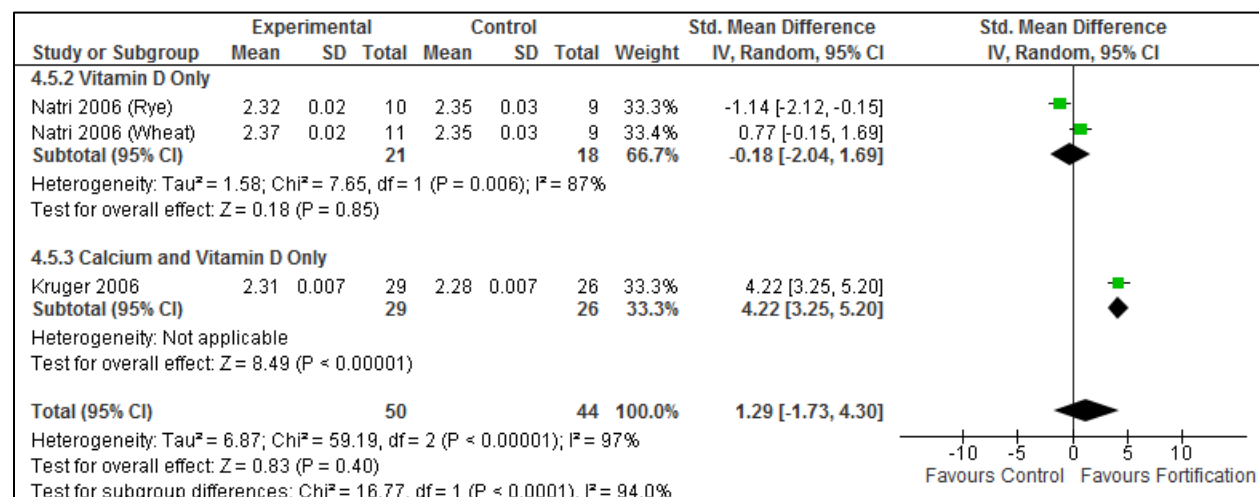

Figure S44 Effect of vitamin D and calcium fortification on CTx levels (bone resorption marker) in women

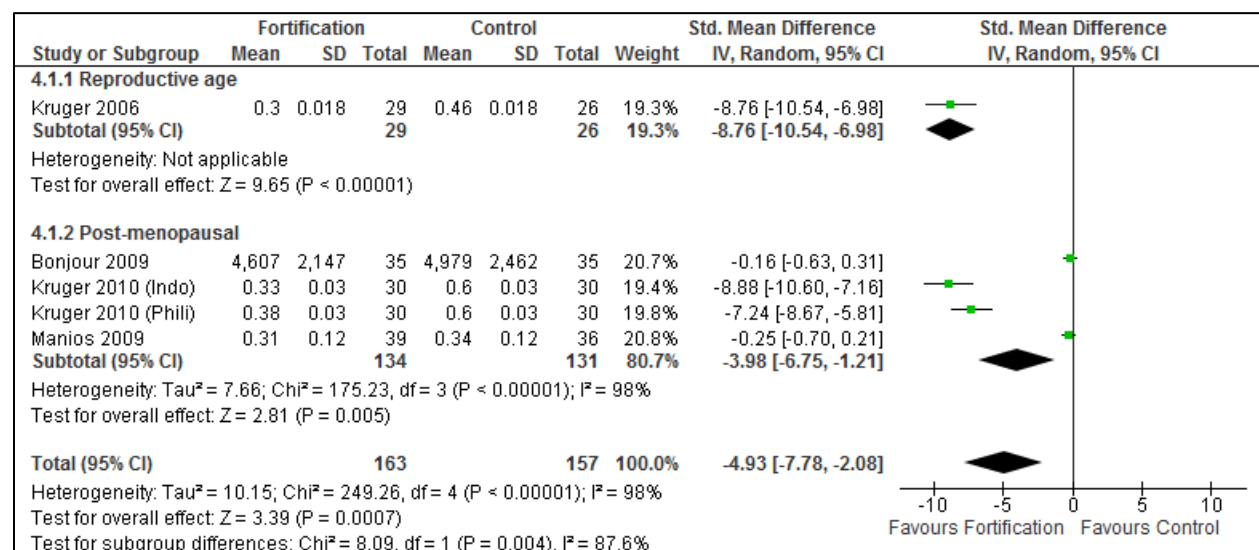

Figure S45 Effect of vitamin D and calcium fortification on P1NP levels (bone resorption marker) in women

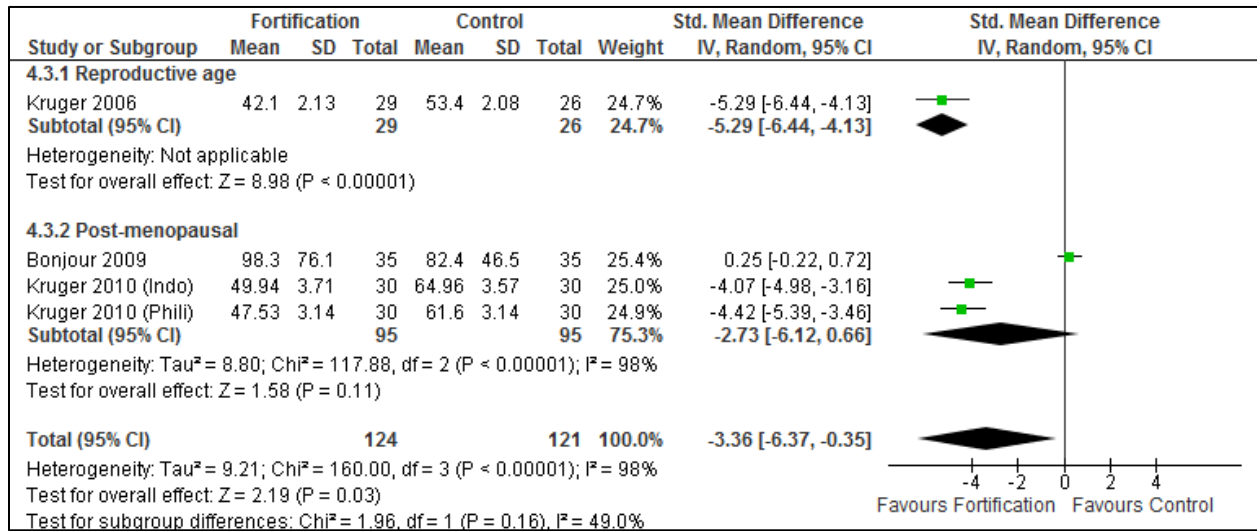

Figure S46 Effect of MMN fortification on serum ferritin levels in women

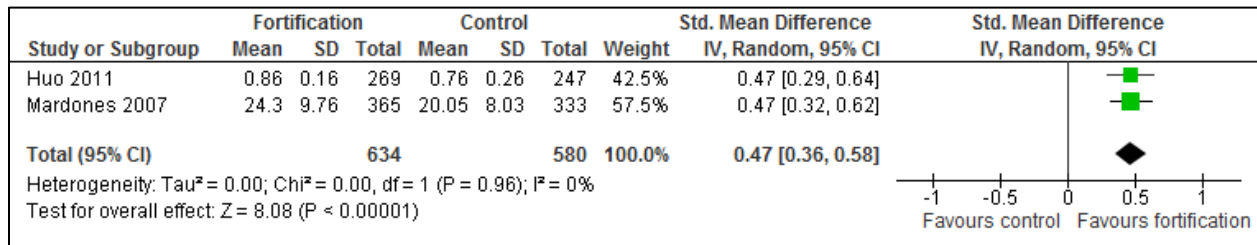

Figure S47 Effect of MMN fortification on serum zinc levels in women

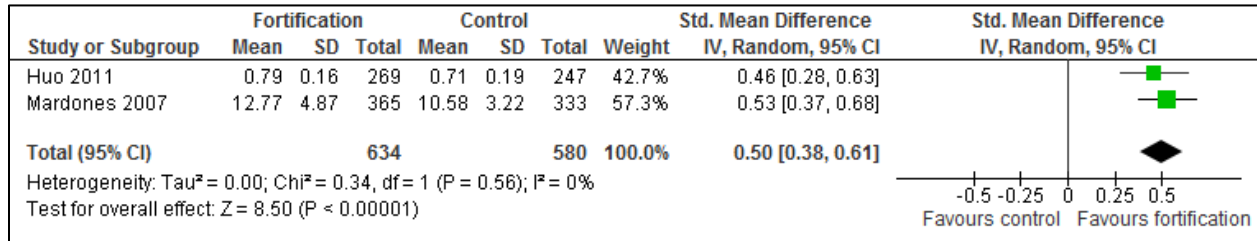

Supplement: 2046-4053-2-67-S2.pdf [file 2046-4053-2-67-S2.pdf]
