# Supplementary material for: Micronutrient fortification of food and its impact on woman and child health: a systematic review
Source: PubMed Central journal article supplement (PMC3765883; doi:10.1186/2046-4053-2-67), 2013-08-23
Supplement: 2046-4053-2-67-S1.pdf [file 2046-4053-2-67-S1.pdf]

Table S1 Study characteristics for iron fortification in children

| Iron Fortification |           |                |              |                                                |                        |                                                                |                                                |                                           |                                              |
|--------------------|-----------|----------------|--------------|------------------------------------------------|------------------------|----------------------------------------------------------------|------------------------------------------------|-------------------------------------------|----------------------------------------------|
| Author             | Year      | Country        | Study design | Target population                              | Fortification strategy | Fortification compound and Carrier                             | Amount of micronutrient used for fortification | Duration of intervention period evaluated | Target population daily micronutrient intake |
| Abizari[1]         | 2012      | Ghana          | RCT          | 5 -17 year old children                        | Targeted               | Cowpea flour with NaFeEDTA                                     | 10 mg Fe/meal as NaFeEDTA                      | 7 months                                  | Not mentioned                                |
| Andang'o[2]        | 2007      | Kenya          | RCT          | 3-8 year old children                          | Targeted               | NaFeEDTA or electrolytic iron fortified maize flour            | Not mentioned                                  | 20 weeks                                  | Not mentioned                                |
| Arcanjo[3]         | 2010      | Brazil         | RCT          | 2 to 5 year old children                       | Targeted               | Iron fortified drinking water                                  | 10mg/L                                         | 16 weeks                                  | Not mentioned                                |
| Daly Williams[4]   | 1996/1999 | UK             | RCT          | Infants 6-8 months age                         | Targeted               | Formula milk                                                   | 12 mg/L                                        | 24 months                                 | 52 µg/100 mL unmodified cow's milk           |
| Barbosa[5]         | 2012      | Brazil         | RCT          | 2 to 6 year old children                       | Targeted               | Wheat rolls with microencapsulated iron                        | 4mg/20g                                        | 24 weeks                                  | Not mentioned                                |
| Beinner[6]         | 2005      | Brazil         | Before-After | Preschool children ages 6-59 months            | Targeted               | iron sulfate in Drinking water 5d/week                         | 12 g elemental iron                            | 8 months                                  | Not mentioned                                |
| Beinner[7]         | 2010      | Brazil         | RCT          | Anemic children 6-24 months age                | Targeted               | micronized ferric pyrophosphate in Rice                        | 23.4g/kg                                       | 5 months                                  | Not mentioned                                |
| Chen[8]            | 2005      | China          | RCT          | Children above the age of 3 years              | Targeted               | NaFeEDTA in Soy sauce                                          | 296mg/L                                        | 18 months                                 | Not mentioned                                |
| De Almeida[9]      | 2005      | Brazil         | RCT          | Children at day care center (5 years and less) | Targeted               | Water fortified with elemental iron                            | 10mg elemental iron per LL                     | Six months                                | Not mentioned                                |
| Gill[10]           | 1997      | UK and Ireland | RCT          | 6 months old infants                           | Targeted               | Formula milk                                                   | 12.3 mg/L                                      | 9 months                                  | Not mentioned                                |
| Giorgini[11]       | 2001      | Brazil         | Before-After | Preschool children (12-72 months old)          | Targeted               | Sweet rolls                                                    | 80mg/kg                                        | 6 months                                  | Not mentioned                                |
| Haschke[12]        | 1988      | Austria        | RCT          | Infants (less than 24 months old)              | Targeted               | Ferrous sulphate in Formula milk and Meat-containing baby food | 20 mg/kg                                       | 8 months                                  | Not mentioned                                |
| Huo[13]            | 2002      | China          | RCT          | Anemic children 11-17 years of age             | Targeted               | NaFeEDTA in Soy sauce                                          | Low: 1 g/L High 4g/L                           | 3 months                                  | Not mentioned                                |
| Iost[14]           | 1998      | Brazil         | Before-After | Infants 6- 24 month old                        | Targeted               | iron amino acid chelate in Butterfat                           | 3mg/L                                          | 32 weeks                                  | Not mentioned                                |

|                 |      |              |              |                                          |          |                                                               |                                                      |          |               |
|-----------------|------|--------------|--------------|------------------------------------------|----------|---------------------------------------------------------------|------------------------------------------------------|----------|---------------|
|                 |      |              | After        |                                          |          | milk                                                          |                                                      |          |               |
| Thi Le[15]      | 2006 | Vietnam      | RCT          | Anemic children of ages 5 to 12 years    | Targeted | Instant noodles 5d/week                                       | 205.8 mg/kg                                          | 6 months | Not mentioned |
| Longfils[16]    | 2008 | Cambodia     | RCT          | Students age 6-21 years                  | Targeted | NaFeEDTA and FeSO <sub>4</sub> +citrate in fish sauce 6d/week | 1.09 g/L                                             | 21 weeks | Not mentioned |
| Marsh[17]       | 1959 | USA          | RCT          | Infants (less than 24 months)            | Targeted | Formula milk with FeSO <sub>4</sub>                           | 12mg Fe in 32 ounces of milk                         | 9 months | Not mentioned |
| Miglioranza[18] | 2008 | Brazil       | Before-After | Children age 7-14 years                  | Mass     | H <sub>2</sub> -reduced Fe in corn-flour                      | 98 mg/kg                                             | 6 months | Not mentioned |
| Morley[19]      | 1999 | UK           | RCT          | Infants (less than 24 months)            | Targeted | ferrous sulphate in Formula milk                              | 1.2 mg/L                                             | 9 months | Not mentioned |
| Moretti[20]     | 2006 | India        | RCT          | Iron-depleted 6-13 year old children     | Mass     | ferric pyrophosphate in Rice-based meal 6d/week               | 200 mg/kg                                            | 7 month  | Not mentioned |
| Muthayya[21]    | 2012 | India        | RCT          | 6 to 15 years old iron depleted children | Targeted | Wheat based lunch with NaFeEDTA fortification                 | 6mg Fe/100g flour                                    | 28 weeks | Not mentioned |
| Nogueira[22]    | 2012 | Brazil       | RCT          | Infants (less than 24 months)            | Targeted | Rice with micronized ferric pyrophosphate                     | 56.5mg/50g                                           | 18 weeks | Not mentioned |
| Nogueira[23]    | 2012 | Brazil       | RCT          | Infants (less than 24 months)            | Targeted | FeSO <sub>4</sub> in porridge                                 | 10mg per portion                                     | 14 weeks | Not mentioned |
| Rim[24]         | 2008 | Korea        | RCT          | Infants 6-12 months age                  | Targeted | ferrous sulphate in Water in which rice porridge cooked       | 0.5g/kg                                              | 6 months | Not mentioned |
| Rohner[25]      | 2010 | Cot d'Ivoire | RCT          | 6-14 year old school children            | Targeted | Electrolytic iron in Biscuits 4 times/week                    | Not mentioned                                        | 6 month  | Not mentioned |
| Sari[26]        | 2001 | Indonesia    | RCT          | children age 4-6 years                   | Targeted | Elemental iron in candies (10/week over 3d)                   | 1 g/kg                                               | 12 week  | Not mentioned |
| Stevens[27]     | 1995 | UK           | RCT          | Infants (less than 12 months)            | Targeted | Ferrous Sulphate in Formula milk                              | 12 mg/L                                              | 1 year   | Not mentioned |
| Sketel[28]      | 1988 | Chile        | RCT          | 3 to 15 months old healthy infants       | Targeted | full-fat acidified milk fortified with FeSO <sub>4</sub>      | 15 mg of elemental Fe as ferrous sulfate/100g powder | 1 year   | Not mentioned |
| Singhal[29]     | 2000 | UK           | RCT          | Infants (less than 12 months)            | Targeted | Ferrous Sulphate in Formula milk                              | 12 mg/L                                              | 1 year   | 69 µg/L       |
| Shamah-Levy[30] | 2008 | Mexico       | RCT          | Toddlers 12-30 months                    | Targeted | Baby food                                                     | 227.3 mg/kg                                          | 6 months | 9090µg/kg     |
| Semba[31]       | 2010 | Indonesia    | Survey       | Children age 6-59 months                 | Mass     | Milk and instant noodles                                      | Not mentioned                                        | Variable | Not mentioned |

|                       |      |              |     |                                          |          |                                                                        |                   |          |               |
|-----------------------|------|--------------|-----|------------------------------------------|----------|------------------------------------------------------------------------|-------------------|----------|---------------|
| Schuermann[32]        | 2005 | Guatemala    | RCT | Children age 12-36 months                | Targeted | Iron sulphate in refried black beans 5d/week                           | 224 mg/kg         | 10 weeks | Not mentioned |
| Walter[33]            | 1993 | Chile        | RCT | Children of ages 2 to 15 years           | Mass     | Hb concentrate cookies                                                 | Not mentioned     | 3 years  | Not mentioned |
| Walter[34]            | 1993 | USA          | RCT | 4 months old infants                     | Targeted | Iron fortified infant cereal                                           | Not mentioned     | 44 weeks | Not mentioned |
| Van Stuijvenberg [35] | 2008 | South Africa | RCT | Children age 6-11 years with Hb< 125 g/L | Targeted | Brown bread                                                            | Not mentioned     | 34 weeks | 1196.6 µg/kg  |
| Sun[36]               | 2007 | China        | RCT | anemic students 11-18 years old          | Targeted | sodium iron ethylenediaminetetra acetic acid (NaFeEDTA) in Wheat flour | Not mentioned     | 6 months | Not mentioned |
| Tuthill[37]           | 2002 | UK           | RCT | Infants (less than 12 months)            | Targeted | formula milk                                                           | 5 mg/L            | 3 months | Not mentioned |
| Virtanen[38]          | 2001 | Sweden       | RCT | Healthy 12 months old infants            | Targeted | ferrous gluconate or ferrous lactate in cow's milk                     | 7 mg/L, 14.9 mg/L | 6 months | Not mentioned |
| Ziegler[39]           | 2009 | USA          | RCT | Infants (less than 12 months)            | Targeted | Ferrous sulphate in cereal                                             | 61.9 mg/kg        | 2 years  | Not mentioned |
| Zimmerman [40]        | 2010 | Ivory        | RCT | 6 to 14 year old children                | Targeted | Elemental Iron fortified biscuits                                      | 20mg Fe/day       | 24 weeks | Not mentioned |
| Zimmerman [41]        | 2006 | India        | RCT | 5-9 year old children                    | Targeted | Iron fortified rice meal (ferric pyrophosphate)                        | 15mg Fe/day       | 16 weeks | Not mentioned |

Table S2 Study characteristics for zinc fortification in children

| Zinc            |      |         |              |                                                                       |                        |                                    |                                                |                                           |                                              |
|-----------------|------|---------|--------------|-----------------------------------------------------------------------|------------------------|------------------------------------|------------------------------------------------|-------------------------------------------|----------------------------------------------|
| Author          | Year | Country | Study design | Target population                                                     | Fortification strategy | Fortification compound and Carrier | Amount of micronutrient used for fortification | Duration of intervention period evaluated | Target population daily micronutrient Intake |
| Brown[42]       | 2007 | Peru    | RCT          | Infants aged 6 to 8 months with risk of stunting                      | Targeted               | Zinc Sulphate in Porridge          | 150 mg/kg dry weight                           | 6 months                                  | Not mentioned                                |
| Diaz Gomez[43]  | 2003 | Spain   | RCT          | VLBW Preterm infants                                                  | Targeted               | Zinc sulphate in Formula feed      | 10 mg/L (5 mg/L)                               | 6 months                                  | Not mentioned                                |
| Friel[44]       | 2003 | Canada  | RCT          | VLBW Newborns                                                         | Targeted               | Zinc Sulphate in Formula feed      | 11 mg/L (6.7 mg/L)                             | 6 months                                  | Not mentioned                                |
| Hambidge[45]    | 1979 | USA     | RCT          | 2-7 year old children                                                 | Targeted               | Zinc oxide in cereals              | 3.75 mg/ounce                                  | 9 months                                  | Not mentioned                                |
| Kilic[46]       | 1998 | Turkey  | RCT          | 7-11 year old school going children with asymptomatic zinc deficiency | Targeted               | Zinc acetate in Bread              | 400 mg/ loaf                                   | 3 months                                  | Not mentioned                                |
| Matsuda[47]     | 1984 | Japan   | Quasi        | full term newborns                                                    | Targeted               | Formula feed                       | 3.2 mg/L (1.0 mg/L)                            | 5 months                                  | Not mentioned                                |
| Ohiokpehai[48]  | 2009 | Kenya   | Quasi        | 6-9 years old school going children                                   | Targeted               | Porridge                           | 5 mg/100g                                      | 3 months                                  | Not mentioned                                |
| Salmenpera[49]  | 1994 | Finland | RCT          | Full term Newborns                                                    | Targeted               | Formula feed                       | 1.<br>1.1 mg/L                                 | 12 months                                 | Not mentioned                                |
| Schlesinger[50] | 1992 | Chile   | RCT          | Malnourished Infants                                                  | Targeted               | Zinc chloride in Formula feed      | 15 mg/L (3.2 mg/L)                             | 3.5 months                                | Not mentioned                                |
| Walravens[51]   | 1976 | USA     | RCT          | Full term Newborns                                                    | Targeted               | Zinc sulphate in Formula feed      | 5.8 mg/L (1.8 mg/L)                            | 6 months                                  | Not mentioned                                |

Table S3 Study characteristics for Vitamin A fortification in children

| Vitamin A          |      |             |              |                                             |                        |                                        |                                                                        |                                           |                                              |
|--------------------|------|-------------|--------------|---------------------------------------------|------------------------|----------------------------------------|------------------------------------------------------------------------|-------------------------------------------|----------------------------------------------|
| Author             | Year | Country     | Study design | Target population                           | Fortification strategy | Fortification compound and Carrier     | Amount of micronutrient used for fortification                         | Duration of intervention period evaluated | Target population daily micronutrient Intake |
| Arroyave[52]       | 1981 | Guatemala   | Before-After | Children aged 1 to 5 years                  | Targeted               | Sugar                                  | Not mentioned                                                          | 2 years                                   | Not mentioned                                |
| Chen[53]           | 2008 | China       | RCT          | 2-6 year old preschool children             | Targeted               | Vitamin A acetate in Seasoning powder  | 500 µg / 2.5g of powder                                                | 6 months                                  | Not mentioned                                |
| Mejia[54]          | 1982 | Guatemala   | Before-After | Preschool Children (ages less than 6 years) | Targeted               | Sugar                                  | Not mentioned                                                          | 2 years                                   | Not mentioned                                |
| Muhilal[55]        | 1988 | Indonesia   | Before-After | Children (0-5 years)                        | Targeted               | MSG (Mono sodium glutamate)            | 810 µg /g MSG                                                          | 1 year                                    | Not mentioned                                |
| Ribaya-Mercado[56] | 2004 | Nicaragua   | Before-After | Children aged 5 to 9 years                  | Targeted               | Vitamin A acetate in Sugar             | Not mentioned                                                          | 1 year                                    | Not mentioned                                |
| Solon[57]          | 2000 | Philippines | RCT          | Children aged 6 to 13 years                 | Targeted               | Vitamin A palmitate n Flour (pandesal) | 133 µg /pandesal (33% of RDA)                                          | 30 weeks                                  | Not mentioned                                |
| Solon[58]          | 1979 | Philippines | Quasi        | Children 1-16 years                         | Targeted               | MSG                                    | 15000 IU/packet                                                        | 2 years                                   | Not mentioned                                |
| Zhang[59]          | 2010 | China       | RCT          | Children aged 3 to 6 years,                 | Targeted               | Biscuits                               | Group 1: 500 IU / piece (30%,RDA)<br>Group 2: 1666 IU/piece (100% RDA) | 9 months                                  | Not mentioned                                |

Table S4 Study characteristics for Vitamin D and Calcium fortification in children

| Vitamin D and calcium |      |              |              |                                          |                        |                                               |                                                  |                                           |                                                                                           |
|-----------------------|------|--------------|--------------|------------------------------------------|------------------------|-----------------------------------------------|--------------------------------------------------|-------------------------------------------|-------------------------------------------------------------------------------------------|
| Author                | Year | Country      | Study design | Target population                        | Fortification strategy | Fortification compound and Carrier            | Amount of micronutrient used for fortification   | Duration of intervention period evaluated | Target population daily micronutrient Intake                                              |
| Bonjour[60]           | 1997 | Geneva       | RCT          | Pre-pubertal Girls (Range 6.6-9.4 years) | Targeted               | cakes, biscuits, fruit juices, chocolate bars | Not mentioned                                    | 48 weeks                                  | 850 mg of calcium                                                                         |
| Du[61]                | 2004 | China        | RCT          | Children 10-12 years old                 | Targeted               | Milk                                          | 560mg Calcium and 5-8 micrograms Vitamin D/500ml | 2 year                                    | 245 mg Calcium and 3.33 mg cholecalciferol/day                                            |
| Ganmaa [62]           | 2008 | Mongolia     | Before-After | Children (9-11 years)                    | Targeted               | Milk                                          | 100 IU of Vitamin D/236ml of milk                | 1 month                                   | 300IU or 7.5 Vitamin D                                                                    |
| Graham [63]           | 2008 | New Zealand. | RCT          | Children of ages 6 to 9 years            | Targeted               | Milk                                          | Vitamin D3 1.5 µg Ca 480 mg                      | Not mentioned                             | Ca 60% RDA                                                                                |
| Ho[64]                | 2005 | China        | Quasi        | Adolescent girls (14-16 years)           | Targeted               | Soy milk                                      | 600 mg Ca / 375 ml                               | 1years                                    | 600 mg of Calcium                                                                         |
| Koo [65]              | 2006 | USA          | RCT          | Preterm infants                          | Targeted               | Formula Milk                                  | 105 mg Ca, 80 IU Vit D                           | 1 year                                    | Not mentioned                                                                             |
| Rich-Edwards [66]     | 2011 | Mongolia     | RCT          | Children (9-11 years)                    | Targeted               | Milk                                          | Not mentioned                                    | 2 months                                  | Not mentioned                                                                             |
| Veromaa [67]          | 2008 | Finland      | Before-After | Adolescent girls (12-18 years)           | Targeted               | Fluid milk and margarine                      | Not mentioned                                    | 4 years                                   | 73% of the participants consumed at least 800 mg Ca/d<br>16% consumed 7.5 µg vitamin D/d. |
| Zhu[68]               | 2005 | China        | RCT          | Girls (10-12 years)                      | Targeted               | Milk                                          | 1.7 mg/ml                                        | 24 months                                 | 245mgCa and, 3.33 µg vitamin D.                                                           |
| Zhu[69]               | 2008 | China        | RCT          | Girls (10-12 years)                      | Targeted               | Milk                                          | Calcium 560mg/330ml Vit D 5-8 µg                 | 24 months                                 | 245 mg calcium, 3.33 µg vit D                                                             |

Table S5 Study characteristics for folate fortification in children

| Folate        |      |           |              |                           |                        |                                    |                                                |                                           |                                              |
|---------------|------|-----------|--------------|---------------------------|------------------------|------------------------------------|------------------------------------------------|-------------------------------------------|----------------------------------------------|
| Author        | Year | Country   | Study design | Target population         | Fortification strategy | Fortification compound and Carrier | Amount of micronutrient used for fortification | Duration of intervention period evaluated | Target population daily micronutrient Intake |
| Grupp[70]     | 2011 | Canada    | Before-After | children aged 9 and below | Mass                   | Flour                              | Not mentioned                                  | 9 years                                   | Not mentioned                                |
| Wiltshire[71] | 2004 | Australia | Before-After | Children (10 to 14 years) | Mass                   | cereal and bread products          | Not mentioned                                  | 1 year                                    | Not mentioned                                |

Table S6 Study characteristics for iodine fortification in children

| Iodine          |      |                                    |              |                                |                        |                                    |                                                |                                              |  |
|-----------------|------|------------------------------------|--------------|--------------------------------|------------------------|------------------------------------|------------------------------------------------|----------------------------------------------|--|
| Author          | Year | Country                            | Study design | Target population              | Fortification strategy | Fortification compound and Carrier | Amount of micronutrient used for fortification | Target population daily micronutrient Intake |  |
| Delange [72]    | 1999 | Africa                             | Before-After | Children of ages 6 to 14 years | Mass                   | Salt                               | Not Mentioned                                  | Not mentioned                                |  |
| Guttikonda [73] | 2002 | Australia                          | Before-After | Children of ages 4 to 17 years | Mass                   | Salt                               | Not Mentioned                                  | Not mentioned                                |  |
| Jooste [74]     | 2000 | South africa                       | Before-After | Children of ages 8 to 16 years | Mass                   | Salt                               | 40–60 mg/g                                     | Not mentioned                                |  |
| Pongpaew [75]   | 1998 | Thailand                           | Before-After | Children of ages 5 to 17 years | Mass                   | Salt                               | 50 g/100 kg<br>200µg<br>80µg                   | Not mentioned                                |  |
| Yamamah [76]    | 2003 | Egypt                              | Before-After | Girls of ages 8 to 16 years    | Mass                   | Salt                               | 50-80 ppm                                      | Not mentioned                                |  |
| Zimmermann[77]  | 2003 | Côte d'ivoire                      | Before-After | Children of ages 5 to 17 years | Mass                   | Salt                               | 30–50 ppm                                      | Not mentioned                                |  |
| Zimmermann [78] | 2006 | Morocco<br>Albania<br>South Africa | Before-After | Children of ages 5 to 17 years | Mass                   | Salt                               | 25ppm                                          | Not mentioned                                |  |

Table S7 Study characteristics for dual fortification in children

| Dual Fortification |      |               |              |                               |                        |                       |                                                           |                                           |                     |
|--------------------|------|---------------|--------------|-------------------------------|------------------------|-----------------------|-----------------------------------------------------------|-------------------------------------------|---------------------|
| Author             | Year | Country       | Study design | Target population             | Fortification strategy | Fortification Vehicle | Amount of micronutrient used for fortification            | Duration of intervention period evaluated | Micronutrients used |
| Andersson[79]      | 2008 | India         | RCT          | Children(5-15 years)          | Targeted               | Salt                  | both at 2 mg/g salt                                       | 1 year                                    | Iodine, iron        |
| Nugroho[80]        | 2010 | Indonesia     | RCT          | Children (7-9 year old)       | Targeted               | Milk                  | Iron 12.15 mg<br>Zn 4.4 mg                                | 3 months                                  | Fe,Zn               |
| Sivakumar[81]      | 2002 | India         | RCT          | Children (14-17 years)        | Targeted               | Salt                  | Not mentioned                                             | 2 years                                   | Iodine, iron        |
| Vinodkumar[82]     | 2009 | India         | RCT          | Children(7-11 years)          | Targeted               | Salt                  | 28 mg of elemental iron<br>1 mg of riboflavin             | 1 year                                    | Iron<br>Riboflavin  |
| Wegmuller[83]      | 2006 | Cote d'Ivoire | QUASI        | Children (5-15 years)         | Targeted               | Salt                  | 3 mg Fe/g<br>53.8 mg I/g<br>18.2 mg Zn/g salt             | 6 months                                  | Iodine, iron        |
| Zimmermann[84]     | 2003 | Morocco       | RCT          | Children (6-15 years)         | Targeted               | Salt                  | 25 µg/g salt.<br>1 mg Fe/g salt                           | 40 weeks                                  | Iodine, iron        |
| Zimmermann[85]     | 2004 | Morocco       | RCT          | Children (6-15 years)         | Targeted               | Salt                  | 25 g I (as potassium iodate)/g salt<br>and 2 mg Fe/g salt | 10 months                                 | Iodine, iron        |
| Zimmermann[86]     | 2002 | Morocco       | RCT          | Children (6-15 years)         | Targeted               | Salt                  | 25 mg iodine/g salt<br>(1 mg Fe/g salt)                   | 10 months                                 | Iodine, iron        |
| Zlotkin[87]        | 2001 | Ghana         | RCT          | Infants (less than 24 months) | Targeted               | Meals                 | Not mentioned                                             | 2months                                   | Fe, Ascorbic Acid   |
| Zlotkin[88]        | 2003 | Ghana         | RCT          | Infants (less than 24 months) | Targeted               | Weaning foods         | (80 mg of elemental iron<br>10 mg of zinc)                | 2 Months                                  | Fe,Zn               |



Table S8 Study characteristics for multiple-micronutrient fortification in children

| Multiple Micronutrients |      |                |              |                                    |                        |                                                           |                               |                                           |                                              |
|-------------------------|------|----------------|--------------|------------------------------------|------------------------|-----------------------------------------------------------|-------------------------------|-------------------------------------------|----------------------------------------------|
| Author                  | Year | Country        | Study design | Target population                  | Fortification strategy | Fortification compound and Carrier                        | Number of micronutrients used | Duration of intervention period evaluated | Target population daily micronutrient Intake |
| Chen[89]                | 2011 | China          | RCT          | Children (2-6 years)               | Targeted               | Food                                                      | 8                             | 6 months                                  | Not mentioned                                |
| Chen[90]                | 2008 | China          | RCT          | Children (2-6 years)               | Targeted               | Food                                                      | 8                             | 6 months                                  | Not mentioned                                |
| Faber[91]               | 2005 | South Africa.  | RCT          | Children (6-12 months)             | Targeted               | maize meal                                                | 10                            | 6 months                                  | Not mentioned                                |
| Gershoff[92]            | 1977 | Thailand       | Quasi        | Children (1.5-9 years)             | Targeted               | Rice                                                      | 6                             | 4 years                                   | Not mentioned                                |
| Gibson[93]              | 2011 | Zambia         | RCT          | Children (6 months)                | Targeted               | Porridge                                                  | 19                            | 12 months                                 | Not mentioned                                |
| Goyle[94]               | 2010 | India          | Before-After | adolescent girls (10-16 years)     | Targeted               | Biscuits                                                  | 5                             | 4 months                                  | Not mentioned                                |
| Kumar[95]               | 2007 | India          | Quasi        | Children(7-11 years)               | Targeted               | Salt                                                      | 10                            | 1 year                                    | Not mentioned                                |
| Kuusipalo[96]           | 2006 | Malawi         | RCT          | 6-17 months<br>underweight infants | Targeted               | fortified spread                                          | 20                            | 12 weeks                                  | Not mentioned                                |
| Lartey[97]              | 1999 | Ghana          | RCT          | Infants (6-12 month)               | Targeted               | maize corn                                                | 16                            | 1 year                                    | Not mentioned                                |
| Layrisse[98]            | 1996 | Venezuela      | Before-After | Children (7-15 years)              | Targeted               | Maize                                                     | 3                             | 1 year                                    | Not mentioned                                |
| Lien[99]                | 2009 | Vietnam        | RCT          | Children (7-8 years)               | Targeted               | Milk                                                      | 19                            | 6 months                                  | Not mentioned                                |
| Lin[100]                | 2008 | Malawi         | RCT          | Children (6 months)                | Targeted               | peanut-/soy-based<br>fortified spread vs corn<br>porridge | 14                            | 1 year                                    | Not mentioned                                |
| Liu[101]                | 1993 | China          | RCT          | Children (6-13 months)             | Targeted               | Rusk                                                      | 10                            | 3 months                                  | Not mentioned                                |
| Lopriore[102]           | 2004 | Algeria        | RCT          | Children (3-6 years)               | Targeted               | Spread                                                    | 18                            | 6 months                                  | Not mentioned                                |
| Loui[103]               | 2004 | Germany        | RCT          | Preterm infants (<33 weeks)        | Targeted               | human milk                                                | 7                             | 6 weeks                                   | Not mentioned                                |
| Lucas[104]              | 1996 | United kingdom | RCT          | Preterm infants (23-36 weeks)      | Targeted               | human milk                                                | 20                            | 18 months                                 | Not mentioned                                |
| Lutter[105]             | 2007 | Santo Domingo  | quasi        | Children (9-14 months)             | Targeted               | Milk                                                      | 18                            | 1 year                                    | Not mentioned                                |
| Manger[106]             | 2008 | Thailand       | RCT          | Children (5.5-13.4 years)          | Targeted               | Food                                                      | 4                             | 31 week                                   | Not mentioned                                |

|                   |      |              |              |                           |          |                                      |    |                           |               |
|-------------------|------|--------------|--------------|---------------------------|----------|--------------------------------------|----|---------------------------|---------------|
| Manno[107]        | 2011 | Zambia       | RCT          | Children (6 months)       | Targeted | Porridge                             | 18 | 1 year                    | Not mentioned |
| Morgan[108]       | 2010 | New Zealand  | RCT          | Infants (12-20 months)    | Targeted | red meat and milk                    | 5  | 20 weeks                  | Not mentioned |
| Nesamvuni[109]    | 2005 | Africa       | RCT          | Children (1-3 years)      | Targeted | maize meal                           | 4  | 12months                  | Not mentioned |
| Nga[110]          | 2009 | Vietnam      | quasi        | Children (6-8year)        | Targeted | Biscuits                             | 11 | 4 months                  | Not mentioned |
| Osei[111]         | 2010 | India        | RCT          | Children (6-10 year)      | Targeted | Meal                                 | 5  | 10 months                 | Not mentioned |
| Que'draogo[112]   | 2010 | Burkina Faso | RCT          | Children (6-23 months)    | Targeted | ingredient-based gruel               | 5  | 6 months                  | Not mentioned |
| Phu[113]          | 2010 | Vietnam      | RCT          | Infants (5 month old)     | Targeted | flour (FF) or a food complement (FC) | 6  | 6 months                  | Not mentioned |
| Rivera[114]       | 2010 | Mexico       | RCT          | Children(12-30 months)    | Targeted | Milk                                 | 9  | 12 months                 | Not mentioned |
| Sazawal[115]      | 2010 | India        | RCT          | Children (1-3 years)      | Targeted | Milk                                 | 24 | 1 year                    | Not mentioned |
| Seal [116]        | 2007 | Zambia       | Before-After | Adolescents (10-18 years) | Targeted | maize meal                           | 9  | 12 months                 | Not mentioned |
| Stekel[117]       | 1988 | Chile        | RCT          | Children (3-15 months)    | Targeted | Milk                                 | 4  | 3-15 months               | Not mentioned |
| Stuijvenberg[118] | 1999 | South Africa | RCT          | Children (6-11 years)     | Targeted | Biscuits                             | 3  | 43 weeks over a 12 months | Not mentioned |
| Torrejo'n[119]    | 2004 | Chile        | RCT          | Infants (< 6 months)      | Targeted | Milk                                 | 3  | 12 months                 | Not mentioned |
| Varma[120]        | 2007 | India        | RCT          | Children (36-66 months)   | Targeted | Khichdi                              | 3  | 24 weeks                  | Not mentioned |
| Villalpando,[121] | 2006 | Mexico       | RCT          | Children (10-30 months)   | Targeted | Milk                                 | 5  | 6 months                  | Not mentioned |
| Winichagoon[122]  | 2006 | Thailand     | RCT          | Children (5.5-14 years)   | Targeted | Lunch                                | 4  | 31 weeks                  | Not mentioned |

Table S9 Study characteristics for iron fortification in women

| Author           | Year | Country     | Study design       | Target population                                    | Fortification strategy | Fortification compound and Carrier                                                  | Amount of micronutrient used for fortification | Duration of intervention period evaluated | Target population daily micronutrient Intake   |
|------------------|------|-------------|--------------------|------------------------------------------------------|------------------------|-------------------------------------------------------------------------------------|------------------------------------------------|-------------------------------------------|------------------------------------------------|
| <b>Iron</b>      |      |             |                    |                                                      |                        |                                                                                     |                                                |                                           |                                                |
| Andersson[123]   | 2010 | Switzerland | RCT                | 18-40 year old females with low serum ferritin       | Targeted               | Microionised pyrophosphate or NaFeEDTA in margarine                                 | Not mentioned                                  | 32 weeks                                  | Not mentioned                                  |
| Biebinger[124]   | 2009 | Kuwait      | RCT                | College women ages 18-35                             | Targeted               | Ferrous sulphate in Wheat-flour biscuits                                            | 800 mg/kg                                      | 22 weeks                                  | Not mentioned                                  |
| Blanco-Rojo[125] | 2012 | Spain       | RCT                | 18-35 year old females with Fe deficiency            | Targeted               | Iron phoshate in Fruit juice                                                        | Not mentioned                                  | 16 weeks                                  | Not mentioned                                  |
| Blanco-Rojo[126] | 2011 | Spain       | RCT                | Women aged 18–35 years                               | Targeted               | Iron phoshate in Fruit juice                                                        | 36mg/L                                         | 16 weeks                                  | Not mentioned                                  |
| Chen[8]          | 2005 | China       | RCT                | Male and female above the age of 3 years             | Targeted               | NaFeEDTA in Soy sauce                                                               | 296mg/l                                        | 18 months                                 | NR- baseline and final plasma retinol reported |
| Hoa[127]         | 2005 | Vietnam     | Cluster (communes) | Pregnant women ages 20-32 years                      | Targeted               | Ferrous Fumarate in Milk                                                            | 37.5 mg/L                                      | 16 weeks                                  | Not mentioned                                  |
| Hotz[128]        | 2008 | Mexico      | RCT                | Women 18-49 years of age                             | Targeted               | micronized ferric pyrophosphate in Rice 5d/week                                     | 266.7 mg/Kg                                    | 6 months                                  | Not mentioned                                  |
| Karl[129]        | 2010 | USA         | RCT                | Female army recruits                                 | Targeted               | ferrous sulfate in Food bars                                                        | 797 mg/kg                                      | 9 week                                    | Not mentioned                                  |
| Sadighi[130]     | 2008 | Iran        | Survey             | Women age 15-49 years                                | Targeted               | Ferros sulphate in Wheat flour                                                      | Not mentioned                                  | 3 years                                   | Not mentioned                                  |
| Sadighi[131]     | 2009 | Iran        | Before-After       | Women age 15-49 years                                | Targeted               | Ferrous sulphate in Wheat flour                                                     | Not mentioned                                  | 8 years                                   | Not mentioned                                  |
| Thuy[132]        | 2003 | Vietnam     | RCT                | 17-49 year old non-pregnant women > 80 but < 120 g/L | Targeted               | NaFeEDTA in Fish sauce 6d/week                                                      | 1 g/L                                          | 6 months                                  | Not mentioned                                  |
| Thuy[133]        | 2005 | Vietnam     | RCT                | Non-pregnant woman between 16 and 49 y of age        | Targeted               | NaFeEDTA in fish sauce                                                              | 500 mg/L                                       | 18 months                                 | 0.1 mg/d                                       |
| Zimmerman[134]   | 2005 | Thailand    | RCT                | 18-50 year old women                                 | Targeted               | Fortified snacks with FeSO <sub>4</sub> , Electrolytic iron and hydrogen based iron | Not mentioned                                  | 35 weeks                                  | NR                                             |

**Table S10 Study characteristics for zinc fortification in women**

| Zinc       |      |         |              |                                          |                        |                                    |                                                |                                           |                                              |
|------------|------|---------|--------------|------------------------------------------|------------------------|------------------------------------|------------------------------------------------|-------------------------------------------|----------------------------------------------|
| Author     | Year | Country | Study design | Target population                        | Fortification strategy | Fortification compound and Carrier | Amount of micronutrient used for fortification | Duration of intervention period evaluated | Target population daily micronutrient Intake |
| Badii[135] | 2012 | Iran    | RCT          | Zinc-deficient women aged 19 to 49 years | Targeted               | Zinc sulfate in bread              | 50 and 100 mg/Kg                               | 1 month                                   | Not mentioned                                |

**Table S11 Study characteristics for folate fortification in women**

| Folate            |      |            |              |                   |                        |                                    |                                                |                                           |                                              |
|-------------------|------|------------|--------------|-------------------|------------------------|------------------------------------|------------------------------------------------|-------------------------------------------|----------------------------------------------|
| Author            | Year | Country    | Study design | Target population | Fortification strategy | Fortification compound and Carrier | Amount of micronutrient used for fortification | Duration of intervention period evaluated | Target population daily micronutrient Intake |
| Alasfoor[136]     | 2008 | Oman       | Before-After | Pregnant women    | Mass                   | Flour                              | 5mg/kg                                         | 10 years                                  | Not mentioned                                |
| Amarin[137]       | 2010 | Jordon     | Before-After | WRA*              | Mass                   | grain products                     | Not mentioned                                  | 3 years                                   | Not mentioned                                |
| Bar-oz[138]       | 2008 | Canada     | Before-After | WRA (14-45)       | Mass                   | Flour                              | 0.15mg/100gm                                   | 8 years                                   | Not mentioned                                |
| Bol[139]          | 2006 | US         | Before-After | WRA               | Mass                   | Flour                              | 40 µg /100 g                                   | 3 years                                   | Not mentioned                                |
| Boulet[140]       | 2008 | US         | Before-After | WRA               | Mass                   | cereal grain products              | 40 µg /100 g                                   | 5 years                                   | Not mentioned                                |
| Canfield[141]     | 2005 | US         | Before-After | WRA               | Mass                   | Flour                              | 40 µg /100 g                                   | 2 years                                   | Not mentioned                                |
| Chen[142]         | 2004 | Costa Rica | Before-After | WRA (15-44 years) | Mass                   | wheat and corn flour               | 1.8mg/kg                                       | 3 years                                   | 108 µg / day                                 |
| Chen[143]         | 2008 | US         | Before-After | WRA               | Mass                   | cereal grain products              | 40 µg /100 g                                   | 7 years                                   | Not mentioned                                |
| Hertrampf[144]    | 2003 | Chile      | Before-After | WRA               | Mass                   | Wheat Flour                        | 2.2 mg/kg                                      | 1 year                                    | 400 µg / day                                 |
| Honein[145]       | 2001 | USA        | Before-After | WRA               | Mass                   | Flour                              | 40 µg /100 g                                   | 1 year                                    | Not mentioned                                |
| Ionescu-ittu[146] | 2009 | Canada     | Before-After | WRA               | Mass                   | Flour & Pasta products             | Not mentioned                                  | 7 years                                   | Not mentioned                                |
| Kucik[147]        | 2004 | USA        | Before-After | WRA               | Mass                   | Cereal products                    | 40 µg /100 g                                   | Not mentioned                             | Not mentioned                                |

|                    |      |              |              |             |      |                       |                           |               |               |
|--------------------|------|--------------|--------------|-------------|------|-----------------------|---------------------------|---------------|---------------|
| Lawrence[148]      | 2004 | USA          | Before-After | WRA         | Mass | cereal grain products | 40 µg /100 g              | 2 years       | Not mentioned |
| Liu[149]           | 2004 | Canada       | Before-After | WRA         | Mass | Grain products        | Not mentioned             | 1 years       | Not mentioned |
| Lopez-Comello[150] | 2005 | Chile        | Before-After | WRA         | Mass | Wheat Flour           | Not mentioned             | 5 years       | Not mentioned |
| Modjadji[151]      | 2007 | South Africa | Before-After | WRA (18-44) | Mass | Staple Food           | Not mentioned             | 1 year        | 250 µg / day  |
| Murphy[152]        | 2000 | UK           | Before-After | WRA         | Mass | cereal and bread      | Not mentioned             | Not mentioned | Not mentioned |
| Orioli[153]        | 2011 | Brazil       | Before-After | WRA         | Mass | wheat and maize flour | 150 µg /100g              | 2 years       | Not mentioned |
| Pacheco[154]       | 2009 | Brazil       | Before-After | WRA         | Mass | Wheat                 | 150 µg /100g              | 2 years       | Not mentioned |
| Persad[155]        | 2002 | Canada       | Before-After | WRA         | Mass | Grains                | 0.15mg/100g               | 3 years       | Not mentioned |
| Ray[156]           | 2004 | Canada       | Before-After | WRA         | Mass | cereal grains         | 0.15mg/100g               | 3 years       | Not mentioned |
| Ray[157]           | 2003 | Canada       | Before-After | WRA         | Mass | cereal grains         | 0.15mg/100g               | 3 years       | Not mentioned |
| Robbins[158]       | 2006 | USA          | Before-After | WRA         | Mass | cereal grains         | 40 µg /100 g              | 4 years       | Not mentioned |
| Safdar[159]        | 2007 | Saudi Arabia | Before-After | WRA         | Mass | Flour                 | 16.53 g of folic in 1000g | 4 years       | Not mentioned |
| Sayed[160]         | 2008 | South Africa | Before-After | WRA         | Mass | Staple foods          | Not mentioned             | 1 year        | Not mentioned |
| Shaw[161]          | 2003 | USA          | Before-After | WRA         | Mass | grain products        | 40 µg /100 g              | 1 year        | Not mentioned |
| Signore[162]       | 2005 | USA          | Before-After | WRA         | Mass | grain product s       | 40 µg /100 g              | 2 years       | Not mentioned |
| Simmons[163]       | 2004 | USA          | Before-After | WRA         | Mass | grain products        | 40 µg /100 g              | 2 years       | Not mentioned |
| Waller[164]        | 2003 | USA          | Before-After | WRA         | Mass | Grains                | 40 µg /100 g              | 1 year        | Not mentioned |
| Williams[165]      | 2002 | USA          | Before-After | WRA         | Mass | Grains                | 40 µg /100 g              | 1 year        | Not mentioned |

\*WRA: Women of reproductive age

Table S12 Study characteristics for Vitamin D and calcium fortification in women

| Vitamin D and calcium |      |                          |              |                                         |                        |                                    |                                                          |                                           |                                                        |
|-----------------------|------|--------------------------|--------------|-----------------------------------------|------------------------|------------------------------------|----------------------------------------------------------|-------------------------------------------|--------------------------------------------------------|
| Author                | Year | Country                  | Study design | Target population                       | Fortification strategy | Fortification compound and Carrier | Amount of micronutrient used for fortification           | Duration of intervention period evaluated | Target population daily micronutrient Intake           |
| Adolphi [166]         | 2009 | Germany                  | RCT          | Post-Menopausal (48-67 years)           | Targeted               | fermented milk                     | Control 210 mg Ca and Intervention 510 mg Ca             | 2 weeks                                   | Not mentioned                                          |
| Bonjour [167]         | 2009 | France                   | Before-After | Elderly Women (Mean Age 84.8 years)     | Targeted               | Soft plain cheese                  | Calcium: 151 mg/100g of cheese                           | 30 days                                   | 2.5 µg vitamin D, 302 mg Ca (7-45% RDA)                |
| Chee [168]            | 2003 | Malaysia                 | RCT          | Post Menopausal (55-65 years)           | Targeted               | Milk                               | 24 mg/g of skimmed milk                                  | 24 months                                 | 1200 mg calcium/ day                                   |
| Ferrar [169]          | 2010 | UK                       | RCT          | WRA* (20-39 years)                      | Targeted               | Ice cream                          | Group 1: Ca 244 mg<br>Group 2: 459 mg<br>Group 3: 676 mg | 28 days                                   | Group 1: Ca 244mg<br>Group 2: 459mg<br>Group 3: 676 mg |
| Green [170]           | 2010 | New Zealand.             | RCT          | Women (18-47 years)                     | Targeted               | Milk                               | vitamin D (5+ )                                          | 12 weeks                                  | 5ug of Vitamin D                                       |
| Kruger[171]           | 2006 | New Zealand              | RCT          | Pre-Menopausal Women (20-35 years)      | Targeted               | Skimmed milk                       | 1000 mg of calcium, 5 g of vitamin D3                    | 16 weeks                                  | Not mentioned                                          |
| Kruger[172]           | 2010 | Indonesia<br>Philippines | Quasi        | Postmenopausal women (>55 years of age) | Targeted               | Milk                               | 1200 mg calcium and 9.6 µg vit D per 60 g serving        | 16 weeks                                  | Not mentioned                                          |
| Lau[173]              | 2001 | China                    | RCT          | Postmenopausal women (55-59 years)      | Targeted               | Milk                               | 40mg/g                                                   | 2 years                                   | 800 mg                                                 |
| Manios [174]          | 2009 | Greece                   | Quasi        | Post-menopausal women (55-65 years)     | Targeted               | Dairy products                     | Not mentioned                                            | 3 months                                  | 1200 mg of calcium and 7.5 µg of vitamin D3            |
| Moschonis [175]       | 2006 | Greece                   | RCT          | post-menopausal women (55-65 years)     | Targeted               | Dairy products                     | Not mentioned                                            | 12 months                                 | 1200 mg calcium/d and 7.5 mg vitamin D3/d              |
| Natri [176]           | 2006 | Denmark                  | RCT          | Women (25- 45 years)                    | Targeted               | Bread                              | 10 µg/100g                                               | 3 weeks                                   | 10 µg Vit D                                            |
| Recker [177]          | 1985 | USA                      | RCT          | Postmenopausal women (45-70years)       | Targeted               | Milk                               | Not mentioned                                            | 24 months                                 | Not mentioned                                          |
| Storm [178]           | 1998 | USA                      | RCT          | Elderly women (>65years)                | Targeted               | Milk                               | Not mentioned                                            | 2 years                                   | (CaCO3-1000 mg/day                                     |
| Tenta [179]           | 2010 | Greece                   | RCT          | Postmenopausal women (55-65 years)      | Targeted               | Dairy products                     | Not mentioned                                            | 30 months                                 | 1,200 mg of calcium and 7.5 µg of vitamin D            |

\*WRA: Women of reproductive age

**Table S13 Study characteristics for iodine fortification in women**

| Iodine             |      |            |              |                   |                        |                                    |                                                |                                              |
|--------------------|------|------------|--------------|-------------------|------------------------|------------------------------------|------------------------------------------------|----------------------------------------------|
| Author             | Year | Country    | Study design | Target population | Fortification strategy | Fortification compound and Carrier | Amount of micronutrient used for fortification | Target population daily micronutrient Intake |
| Burgees [180]      | 2007 | Australia  | Before-After | Women             | Mass                   | Salt in bread                      | Not Mentioned                                  | Not mentioned                                |
| Camargo [181]      | 2008 | Brazil     | RCT          | Women             | Mass                   | Salt                               | Not Mentioned                                  | Not mentioned                                |
| Carle[182]         | 2006 | Denmark    | Before-After | Women             | Mass                   | Salt and salt in bread             | 13ppm                                          | Not mentioned                                |
| Cerqueira [183]    | 2009 | Denmark    | Before-After | Women             | Mass                   | Salt                               | 13ppm                                          | Not mentioned                                |
| Cerqueira [184]    | 2011 | Denmark    | Before-After | Women             | Mass                   | Salt                               | Not Mentioned                                  | Not mentioned                                |
| Laurberg [185]     | 2006 | Denmark    | Before-After | Women             | Mass                   | Salt                               | 8ppm                                           | Not mentioned                                |
| Moleti [186]       | 2008 | Italy      | Before-After | Pregnant women    | Mass                   | Salt                               | Not Mentioned                                  | Not mentioned                                |
| Moleti [187]       | 2011 | Italy      | Before-After | Pregnant women    | Mass                   | Salt                               | 150µg                                          | Not mentioned                                |
| Pedersen [188]     | 2007 | Denmark    | Before-After | Women             | Mass                   | Salt                               | 8ppm than 13ppm                                | Not mentioned                                |
| Pedersen [189]     | 2011 | Denmark    | Before-After | Women             | Mass                   | Salt                               | Not Mentioned                                  | Not mentioned                                |
| Rasmussen [190]    | 2008 | Denmark    | Before-After | Women             | Mass                   | Salt and bread                     | Not Mentioned                                  | Not mentioned                                |
| Seal [191]         | 2007 | Australia  | Before-After | General           | Mass                   | Bread                              | Not Mentioned                                  | Not mentioned                                |
| Sebotsa [192]      | 2005 | Lesotho    | Before-After | General           | Mass                   | Salt                               | 40 to 60 ppm                                   | Not mentioned                                |
| Sultanalieva [193] | 2009 | Kyrgyzstan | RCT          | General           | Mass                   | Salt                               | 25–55 mg/kg                                    | Not mentioned                                |
| Vejbjerg [194]     | 2007 | Denmark    | Before-After | Women             | Mass                   | Salt                               | 13ppm                                          | Not mentioned                                |
| Vejbjerg [195]     | 2009 | Denmark    | Before-After | Women             | Mass                   | Salt                               | 13ppm                                          | Not mentioned                                |

**Table S14 Study characteristics for dual fortification in women**

| Dual Fortification |      |           |              |                    |                        |                                    |                                                |                                           |                                              |
|--------------------|------|-----------|--------------|--------------------|------------------------|------------------------------------|------------------------------------------------|-------------------------------------------|----------------------------------------------|
| Author             | Year | Country   | Study design | Target population  | Fortification strategy | Fortification compound and Carrier | Amount of micronutrient used for fortification | Duration of intervention period evaluated | Target population daily micronutrient Intake |
| Viteri[196]        | 1995 | Guatemala | RCT          | General Population | Mass                   | sugar                              | Iron<br>Vit A                                  | 32 month                                  | Not mentioned                                |

**Table S15 Study characteristics for multiple-micronutrient fortification in women**

| Multiple Micronutrients |      |         |              |                           |                        |                                    |                          |                                           |                                              |
|-------------------------|------|---------|--------------|---------------------------|------------------------|------------------------------------|--------------------------|-------------------------------------------|----------------------------------------------|
| Author                  | Year | Country | Study design | Target population         | Fortification strategy | Fortification compound and Carrier | Number of micronutrients | Duration of intervention period evaluated | Target population daily micronutrient Intake |
| Adu-Afarwuah[197]       | 2007 | Ghana   | RCT          | General                   | Targeted               | Homemade food                      | 19                       | 1.5 years                                 | Not mentioned                                |
| Huo[198]                | 2011 | China   | Quasi        | Female (20-60 years)      | Targeted               | Flour                              | 7                        | 3 years                                   | Not mentioned                                |
| Mardones[199]           | 2007 | Chile   | RCT          | Pregnant women            | Targeted               | Food                               | 20                       | 9 months                                  | Not mentioned                                |
| Tapola[200]             | 2004 | Finland | RCT          | Men & Women (26-65 years) | Targeted               | Mineral Water                      | 5                        | 8 weeks                                   | Not mentioned                                |
| Tucker[201]             | 2004 | US      | RCT          | Volunteers (50-85 years)  | Targeted               | Breakfast                          | 3                        | 14 weeks                                  | Not mentioned                                |



## REFERENCES

1. Abizari AR, Moretti D, Zimmermann MB, Armar-Klemesu M, Brouwer ID: **Whole Cowpea Meal Fortified with NaFeEDTA Reduces Iron Deficiency among Ghanaian School Children in a Malaria Endemic Area.** *The Journal of nutrition* 2012, **142**(10):1836-1842.
2. Andang'o PE, Osendarp SJ, Ayah R, West CE, Mwaniki DL, De Wolf CA, Kraaijenhagen R, Kok FJ, Verhoef H: **Efficacy of iron-fortified whole maize flour on iron status of schoolchildren in Kenya: a randomised controlled trial.** *Lancet* 2007, **369**(9575):1799-1806.
3. Arcanjo FP, Amancio OM, Braga JA, de Paula Teixeira Pinto V: **Randomized controlled trial of iron-fortified drinking water in preschool children.** *Journal of the American College of Nutrition* 2010, **29**(2):122-129.
4. Williams J, Wolff A, Daly A, MacDonald A, Aukett A, Booth IW, Logan S: **Iron supplemented formula milk related to reduction in psychomotor decline in infants from inner city areas: randomised study**Commentary: Iron deficiency and developmental deficit—the jury is still out. *Bmj* 1999, **318**(7185):693.
5. Barbosa TN, Taddei JA, Palma D, Ancona-Lopez F, Braga JA: **Double-blind randomized controlled trial of rolls fortified with microencapsulated iron.** *Rev Assoc Med Bras* 2012, **58**(1):118-124.
6. Beinrer MA, Lamounier JA, Tomaz C: **Effect of iron-fortified drinking water of daycare facilities on the hemoglobin status of young children.** *Journal of the American College of Nutrition* 2005, **24**(2):107.
7. Beinrer MA, Velasquez-Meléndez G, Pessoa MC, Greiner T: **Iron-Fortified Rice Is As Efficacious As Supplemental Iron Drops in Infants and Young Children.** *The Journal of nutrition* 2010, **140**(1):49.
8. Chen J, Zhao X, Zhang X, Yin S, Piao J, Huo J, Yu B, Qu N, Lu Q, Wang S: **Studies on the effectiveness of NaFeEDTA-fortified soy sauce in controlling iron deficiency: a population-based intervention trial.** *Food & Nutrition Bulletin* 2005, **26**(2):177-186.
9. de Almeida CA, Dutra-De-Oliveira JE, Crott GC, Cantolini A, Ricco RG, Del Ciampo LA, Baptista ME: **Effect of fortification of drinking water with iron plus ascorbic acid or with ascorbic acid alone on hemoglobin values and anthropometric indicators in preschool children in day-care centers in Southeast Brazil.** *Food and nutrition bulletin* 2005, **26**(3):259-265.
10. Gill DG, Vincent S, Segal DS: **Follow-up on formula in the prevention of iron deficiency: a multicentre study.** *Acta Paediatrica* 1997, **86**(7):683-689.
11. Giorgini E, Fisberg M, De Paula RA, Ferreira AM, Valle J, Braga JA: **The use of sweet rolls fortified with iron bis-glycinate chelate in the prevention of iron deficiency anemia in preschool children.** *Archivos Latinoamericanos de Nutricion* 2001, **51**(1):48-53.
12. Haschke F, Pietschnig B, Vanura H, Heil M, Steffan I, Hobiger G, Schuster E, Camaya Z: **Iron intake and iron nutritional status of infants fed iron-fortified beikost with meat.** *The American journal of clinical nutrition* 1988, **47**(1):108.
13. Huo J, Sun J, Miao H, Yu B, Yang T, Liu Z, Lu C, Chen J, Zhang D, Ma Y: **Therapeutic effects of NaFeEDTA-fortified soy sauce in anaemic children in China.** *Asia Pacific journal of clinical nutrition* 2002, **11**(2):123-127.
14. Iost C, Jeppsen RB, Ashmead HDW: **Repleting hemoglobin in iron deficiency anemia in young children through liquid milk fortification with bioavailable iron amino acid chelate.** *Journal of the American College of Nutrition* 1998, **17**(2):187-194.
15. Le Huong T, Inge B, Jan B, Khan N, Frans K: **Efficacy of iron fortification compared to iron supplementation among Vietnamese schoolchildren.** *Nutrition Journal* 2006, **5**.

16. Longfils P, Monchy D, Weinheimer H, Chavasit V, Nakanishi Y, Schumann K: **A comparative intervention trial on fish sauce fortified with NaFe-EDTA and FeSO<sub>4</sub>+ citrate in iron deficiency anemic school children in Kampot, Cambodia.** *Asia Pacific journal of clinical nutrition* 2008, **17**(2):250-257.
17. Marsh A, Long H, Stierwalt E: **Comparative hematologic response to iron fortification of a milk formula for infants.** *Pediatrics* 1959, **24**:404-412.
18. Miglioranza LH, Breganã<sup>3</sup> JW, Dichi I, Matsuo T, Dichi JB, Barbosa DS: **Effectiveness of fortification of corn flour-derived products with hydrogen-reduced elemental iron on iron-deficiency anaemia in children and adolescents in southern Brazil.** *Public Health Nutr* 2009, **12**(02):244.
19. Morley R, Abbott R, Fairweather-Tait S, MacFadyen U, Stephenson T, Lucas A: **Iron fortified follow on formula from 9 to 18 months improves iron status but not development or growth: a randomised trial.** *Archives of disease in childhood* 1999, **81**(3):247-252.
20. Moretti D, Zimmermann MB, Muthayya S, Thankachan P, Lee TC, Kurpad AV, Hurrell RF: **Extruded rice fortified with micronized ground ferric pyrophosphate reduces iron deficiency in Indian schoolchildren: a double-blind randomized controlled trial.** *American Journal of Clinical Nutrition* 2006, **84**(4):822.
21. Muthayya S, Thankachan P, Hirve S, Amalrajan V, Thomas T, Lubree H, Agarwal D, Srinivasan K, Hurrell RF, Yajnik CS *et al*: **Iron Fortification of Whole Wheat Flour Reduces Iron Deficiency and Iron Deficiency Anemia and Increases Body Iron Stores in Indian School-Aged Children.** *The Journal of nutrition* 2012.
22. Nogueira Arcanjo FP, Roberto Santos P, Arcanjo CP, Amancio OM, Braga JA: **Use of Iron-Fortified Rice Reduces Anemia in Infants.** *Journal of tropical pediatrics* 2012.
23. Nogueira Arcanjo FP, Costa Arcanjo C, Nogueira Arcanjo FC, de Albuquerque Campos L, Silverio Amancio OM, Pellegrini Braga JA: **Milk-based Cornstarch Porridge Fortified with Iron is Effective in Reducing Anemia: A Randomized, Double-blind, Placebo-controlled Trial.** *Journal of tropical pediatrics* 2012, **58**(5):370-374.
24. Rim HY, Kim SH, Sim BC, Gang HY, Kim HY, Kim YR, Kim RC, Yang MH, Kim SP: **Effect of iron fortification of nursery complementary food on iron status of infants in the DPRKorea.** *Asia Pacific journal of clinical nutrition* 2008, **17**(2):264-269.
25. Rohner F, Zimmermann MB, Amon RJ, Vounatsou P, Tschannen AB, N'Goran EK, Nindjin C, Cacou MC, Tã©-Bonlã© MD, Utzinger J: **In a randomized controlled trial of iron fortification, anthelmintic treatment, and intermittent preventive treatment of malaria for anemia control in Ivorian children, only anthelmintic treatment shows modest benefit.** *Journal of Nutrition* 2010, **140**(3):635.
26. Sari M, Bloem MW, de Pee S, Schultink WJ, Sastroamidjojo S: **Effect of iron-fortified candies on the iron status of children aged 4-6 y in East Jakarta, Indonesia.** *American Journal of Clinical Nutrition* 2001, **73**(6):1034.
27. Stevens D, Nelson A: **The effect of iron in formula milk after 6 months of age.** *Archives of disease in childhood* 1995, **73**(3):216.
28. Stekel A, Olivares M, Cayazzo M, Chadud P, Llaguno S, Pizarro F: **Prevention of iron deficiency by milk fortification. II. A field trial with a full-fat acidified milk.** *Am J Clin Nutr* 1988, **47**(2):265-269.
29. Singhal A, Morley R, Abbott R, Fairweather-Tait S, Stephenson T, Lucas A: **Clinical safety of iron-fortified formulas.** *Pediatrics* 2000, **105**(3):e38.

30. Shamah-Levy T, Villalpando S, Rivera-Dommarco JA, Mundo-Rosas V, Cuevas-Nasu L, Jimenez-Aguilar A: **Ferrous gluconate and ferrous sulfate added to a complementary food distributed by the Mexican nutrition program Oportunidades have a comparable efficacy to reduce iron deficiency in toddlers.** *Journal of pediatric gastroenterology and nutrition* 2008, **47**(5):660.
31. Semba RD, Moench-Pfanner R, Sun K, de Pee S, Akhter N, Rah JH, Campbell AA, Badham J, Bloem MW, Kraemer K: **Iron-fortified milk and noodle consumption is associated with lower risk of anemia among children aged 6-59 mo in Indonesia.** *American Journal of Clinical Nutrition* 2010, **92**(1):170.
32. Schumann K, Romero-Abal ME, Maturer A, Luck T, Beard J, Murray-Kolb L, Bulux J, Mena I, Solomons NW: **Haematological response to haem iron or ferrous sulphate mixed with refried black beans in moderately anaemic Guatemalan pre-school children.** *Public health nutrition* 2005, **8**(06):572-581.
33. Walter T, Hertrampf E, Pizarro F, Olivares M, Llaguno S, Letelier A, Vega V, Stekel A: **Effect of bovine-hemoglobin-fortified cookies on iron status of schoolchildren: a nationwide program in Chile.** *Am J Clin Nutr* 1993, **57**(2):190-194.
34. Walter T, Dallman PR, Pizarro F, Velozo L, Pena G, Bartholmey SJ, Hertrampf E, Olivares M, Letelier A, Arredondo M: **Effectiveness of iron-fortified infant cereal in prevention of iron deficiency anemia.** *Pediatrics* 1993, **91**(5):976-982.
35. van Stuijvenberg ME, Smuts CM, Lombard CJ, Dhansay MA: **Fortifying brown bread with sodium iron EDTA, ferrous fumarate, or electrolytic iron does not affect iron status in South African schoolchildren.** *Journal of Nutrition* 2008, **138**(4):782.
36. Sun X, Guo Y, Wang S, Sun J: **Social marketing improved the consumption of iron-fortified soy sauce among women in China.** *Journal of Nutrition Education and Behavior* 2007, **39**(6):302-310.
37. Tuthill DP, Cosgrove M, Dunstan F, Stuart ML, Wells JCK, Davies DP: **Randomized double-blind controlled trial on the effects on iron status in the first year between a no added iron and standard infant formula received for three months\*.** *Acta Paediatrica* 2002, **91**(2):119-124.
38. Virtanen MA, Svahn CJE, Viinikka LU, Raiha NCR, Siimes MA, Axelsson IEM: **Iron-fortified and unfortified cow's milk: Effects on iron intakes and iron status in young children.** *Acta Paediatrica* 2001, **90**(7):724-731.
39. Ziegler EE, Nelson SE, Jeter JM: **Iron status of breastfed infants is improved equally by medicinal iron and iron-fortified cereal.** *American Journal of Clinical Nutrition* 2009, **90**(1):76.
40. Zimmermann MB, Chassard C, Rohner F, N'Goran E K, Nindjin C, Dostal A, Utzinger J, Ghattas H, Lacroix C, Hurrell RF: **The effects of iron fortification on the gut microbiota in African children: a randomized controlled trial in Cote d'Ivoire.** *Am J Clin Nutr* 2010, **92**(6):1406-1415.
41. Zimmermann MB, Muthayya S, Moretti D, Kurpad A, Hurrell RF: **Iron fortification reduces blood lead levels in children in Bangalore, India.** *Pediatrics* 2006, **117**(6):2014-2021.
42. Brown KH, Lopez de Romana D, Arsenault JE, Peerson JM, Penny ME: **Comparison of the effects of zinc delivered in a fortified food or a liquid supplement on the growth, morbidity, and plasma zinc concentrations of young Peruvian children.** *Am J Clin Nutr* 2007, **85**(2):538-547.
43. Diaz-Gomez NM, Domenech E, Barroso F, Castells S, Cortabarria C, Jimenez A: **The effect of zinc supplementation on linear growth, body composition, and growth factors in preterm infants.** *Pediatrics* 2003, **111**(5):1002.

44. Friel JK, Andrews WL, Matthew JD, Long DR, Cornel AM, Cox M, McKim E, Zerbe GO: **Zinc supplementation in very-low-birth-weight infants.** *J Pediatr Gastroenterol Nutr* 1993, **17**(1):97-104.
45. Hambidge KM, Chavez MN, Brown RM, Walravens PA: **Zinc nutritional status of young middle-income children and effects of consuming zinc-fortified breakfast cereals.** *Am J Clin Nutr* 1979, **32**(12):2532.
46. Kiliç I, Özalp I, Coskun T, Tokatli A, Emre S, Saldamli I, Köksel H, Ozboy O: **The effect of zinc-supplemented bread consumption on school children with asymptomatic zinc deficiency.** *Journal of pediatric gastroenterology and nutrition* 1998, **26**(2):167.
47. Matsuda I, Higashi A, Ikeda T, Uehara I, Kuroki Y: **Effects of zinc and copper content of formulas on growth and on the concentration of zinc and copper in serum and hair.** *Journal of pediatric gastroenterology and nutrition* 1984, **3**(3):421.
48. Ohiokpehai OMD, Dorcus; Kamau, Joyce: **Serum zinc levels of school children on a corn-soy blend feeding trial in primary schools in Suba district, Kenya.** *J Appl Biosci* 2009, **17**:904 - 912.
49. Salmenpera L, Perheentupa J, Pakarinen P, Siimes MA: **Zinc supplementation of infant formula.** *Am J Clin Nutr* 1994, **59**(5):985.
50. Schlesinger L, Arevalo M, Arredondo S, Diaz M, Lonnerdal B, Stekel A: **Effect of a zinc-fortified formula on immunocompetence and growth of malnourished infants.** *Am J Clin Nutr* 1992, **56**(3):491.
51. Walravens PA, Hambidge KM: **Growth of infants fed a zinc supplemented formula.** *Am J Clin Nutr* 1976, **29**(10):1114.
52. Arroyave G, Mejia LA, Aguilar JR: **The effect of vitamin A fortification of sugar on the serum vitamin A levels of preschool Guatemalan children: a longitudinal evaluation.** *The American journal of clinical nutrition* 1981, **34**(1):41.
53. Chen K, Li TY, Chen L, Qu P, Liu YX: **Effects of vitamin A, vitamin A plus iron and multiple micronutrient-fortified seasoning powder on preschool children in a suburb of Chongqing, China.** *Journal of nutritional science and vitaminology* 2008, **54**(6):440-447.
54. Mejia LA, Arroyave G: **The effect of vitamin A fortification of sugar on iron metabolism in preschool children in Guatemala.** *The American journal of clinical nutrition* 1982, **36**(1):87.
55. Muhilal P: **Vitamin A-fortified monosodium glutamate and health, growth, and survival of children: a controlled field trial.** *American journal of clinical nutrition (USA)* 1988.
56. Ribaya-Mercado JD, Solomons NW, Medrano Y, Bulux J, Dolnikowski GG, Russell RM, Wallace CB: **Use of the deuterated-retinol-dilution technique to monitor the vitamin A status of Nicaraguan schoolchildren 1 y after initiation of the Nicaraguan national program of sugar fortification with vitamin A.** *The American journal of clinical nutrition* 2004, **80**(5):1291.
57. Solon FS, Klemm RDW, Sanchez L, Darnton-Hill I, Craft NE, Christian P, West KP: **Efficacy of a vitamin A-fortified wheat-flour bun on the vitamin A status of Filipino schoolchildren.** *The American journal of clinical nutrition* 2000, **72**(3):738.
58. Solon FS, Fernandez TL, Latham MC, Popkin BM: **Planning, implementation, and evaluation of a fortification program. Control of vitamin A deficiency in the Philippines.** *Journal of the American Dietetic Association* 1979, **74**(2):112.
59. Zhang X, Chen K, Qu P, Liu YX, Li TY: **Effect of biscuits fortified with different doses of vitamin A on indices of vitamin A status, haemoglobin and physical growth levels of pre-school children in Chongqing.** *Public health nutrition* 2010, **13**(09):1462-1471.
60. Bonjour JP, Carrie AL, Ferrari S, Clavien H, Slosman D, Theintz G, Rizzoli R: **Calcium-enriched foods and bone mass growth in prepubertal girls: a randomized, double-blind, placebo-controlled trial.** *Journal of Clinical Investigation* 1997, **99**(6):1287.

61. Du X, Zhu K, Trube A, Zhang Q, Ma G, Hu X, Fraser DR, Greenfield H: **School-milk intervention trial enhances growth and bone mineral accretion in Chinese girls aged 10–12 years in Beijing.** *British Journal of Nutrition* 2004, **92**(01):159-168.
62. Ganmaa D, Tserendolgor U, Frazier L, Nakamoto E, Jargalsaikhan N, Rich-Edwards J: **Effects of vitamin D fortified milk on vitamin D status in Mongolian school age children.** *Asia Pacific journal of clinical nutrition* 2008, **17**(1):68-71.
63. Graham D, Kira G, Conaglen J, McLennan S, Rush E: **Vitamin D status of Year 3 children and supplementation through schools with fortified milk.** *Public health nutrition* 2009, **12**(12):2329-2334.
64. Ho SC, Guldan GS, Woo J, Yu R, Tse MM, Sham A, Cheng J: **A prospective study of the effects of 1-year calcium-fortified soy milk supplementation on dietary calcium intake and bone health in Chinese adolescent girls aged 14 to 16.** *Osteoporosis International* 2005, **16**(12):1907-1916.
65. Koo WWK, Hockman EM: **Posthospital discharge feeding for preterm infants: effects of standard compared with enriched milk formula on growth, bone mass, and body composition.** *The American journal of clinical nutrition* 2006, **84**(6):1357.
66. Rich-Edwards JW, Ganmaa D, Kleinman K, Sumberzul N, Holick MF, Lkhagvasuren T, Dulguun B, Burke A, Frazier AL: **Randomized trial of fortified milk and supplements to raise 25-hydroxyvitamin D concentrations in schoolchildren in Mongolia.** *The American journal of clinical nutrition* 2011.
67. Lehtonen-Veromaa M, Mottonen T, Leino A, Heinonen OJ, Rautava E, Viikari J: **Prospective study on food fortification with vitamin D among adolescent females in Finland: minor effects.** *British Journal of Nutrition* 2008, **100**(2):418-423.
68. Zhu K, Du X, Cowell CT, Greenfield H, Blades B, Dobbins TA, Zhang Q, Fraser DR: **Effects of school milk intervention on cortical bone accretion and indicators relevant to bone metabolism in Chinese girls aged 10–12 y in Beijing.** *The American journal of clinical nutrition* 2005, **81**(5):1168.
69. Zhu K, Greenfield H, Zhang Q: **Effects of two year's milk supplementation on site-corrected bone mineral density of Chinese girls.** *Asia Pac J Clin Nutr* 2008, **17**(S1):147-150.
70. Grupp SG, Greenberg ML, Ray JG, Busto U, Lanctôt KL, Nulman I, Koren G: **Pediatric cancer rates after universal folic acid flour fortification in Ontario.** *The Journal of Clinical Pharmacology* 2011, **51**(1):60.
71. Wiltshire EJ, Couper JJ: **Improved folate status in children and adolescents during voluntary fortification of food with folate.** *Journal of Paediatrics and Child Health* 2004, **40**(1 2):44-47.
72. Delange F, De Benoist B, Alnwick D: **Risks of Iodine-Induced Hyperthyroidism After Correction of Iodine Deficiency by Iodized Salt\*.** *Thyroid* 1999, **9**(6):545-556.
73. Guttikonda K, Burgess JR, Hynes K, Boyages S, Byth K, Parameswaran V: **Recurrent iodine deficiency in Tasmania, Australia: a salutary lesson in sustainable iodine prophylaxis and its monitoring.** *Journal of Clinical Endocrinology & Metabolism* 2002, **87**(6):2809.
74. Jooste P, Zimmermann MB: **Progress towards eliminating iodine deficiency in South Africa.** *South African Journal of Clinical Nutrition* 2008, **21**(1):08.
75. Pongpaew P, Tungtrongchitr R, Phonrat B, Supawan V, Schelp EP, Intarakhao C, Mahaweerawat U, Saowakontha S: **Nutritional status of school children in an endemic area of iodine deficiency disorders (IDD) after one year of iodine supplementation.** *Southeast Asian journal of tropical medicine and public health* 1998, **29**:50-57.

76. Yamamah G: **Monitoring Iodine Deficiency of Female Children After Introducing Iodized Salt in El-Farafra Oasis.** 2003.
77. Zimmermann MB, Hess SY, Adou P, Toresanni T, Wegmuller R, Hurrell RF: **Thyroid size and goiter prevalence after introduction of iodized salt: a 5-y prospective study in schoolchildren in Cote d'Ivoire.** *Am J Clin Nutr* 2003, **77**(3):663-667.
78. Zimmermann MB, Jooste PL, Mabapa NS, Mbhenyane X, Schoeman S, Biebinger R, Chaouki N, Bozo M, Grimci L, Bridson J: **Treatment of iodine deficiency in school-age children increases insulin-like growth factor (IGF)-I and IGF binding protein-3 concentrations and improves somatic growth.** *Journal of Clinical Endocrinology & Metabolism* 2006, **92**(2):437.
79. Andersson M, Thankachan P, Muthayya S, Goud RB, Kurpad AV, Hurrell RF, Zimmermann MB: **Dual fortification of salt with iodine and iron: a randomized, double-blind, controlled trial of micronized ferric pyrophosphate and encapsulated ferrous fumarate in southern India.** *The American journal of clinical nutrition* 2008, **88**(5):1378.
80. Nugroho HW, Lestari ED, Salimo H, Dewi M: **Effects of iron and zinc fortified milk supplementation on working memory of underweight poor-urban school children: A randomized double blind controlled trial.** *Paediatrica Indonesiana* 2010, **50**(2):93.
81. Sivakumar B, Nair KM: **Double fortified salt at crossroads.** *Indian Journal of Pediatrics* 2002, **69**(7):617-623.
82. Vinodkumar M, Rajagopalan S, Bhagwat IP, Singh S, Parmar BS, Mishra OP, Upadhyay SS, Bhalia NB, Deshpande SR: **A multicenter community study on the efficacy of double-fortified salt.** *Food & Nutrition Bulletin* 2007, **28**(1):100-108.
83. Wegmüller R, Camara F, Zimmermann MB, Adou P, Hurrell RF: **Salt dual-fortified with iodine and micronized ground ferric pyrophosphate affects iron status but not hemoglobin in children in Cote d'Ivoire.** *The Journal of nutrition* 2006, **136**(7):1814.
84. Zimmermann MB, Zeder C, Chaouki N, Saad A, Torresani T, Hurrell RF: **Dual fortification of salt with iodine and microencapsulated iron: a randomized, double-blind, controlled trial in Moroccan schoolchildren.** *The American journal of clinical nutrition* 2003, **77**(2):425.
85. Zimmermann MB, Wegmueller R, Zeder C, Chaouki N, Rohner F, Saïssi M, Torresani T, Hurrell RF: **Dual fortification of salt with iodine and micronized ferric pyrophosphate: a randomized, double-blind, controlled trial.** *The American journal of clinical nutrition* 2004, **80**(4):952.
86. Zimmermann MB, Zeder C, Chaouki N, Torresani T, Saad A, Hurrell RF: **Addition of microencapsulated iron to iodized salt improves the efficacy of iodine in goitrous, iron-deficient children: a randomized, double-blind, controlled trial.** *European Journal of Endocrinology* 2002, **147**(6):747.
87. Zlotkin S, Arthur P, Antwi KY, Yeung G: **Treatment of anemia with microencapsulated ferrous fumarate plus ascorbic acid supplied as sprinkles to complementary (weaning) foods.** *The American journal of clinical nutrition* 2001, **74**(6):791.
88. Zlotkin S, Arthur P, Schauer C, Antwi KY, Yeung G, Piekarz A: **Home-fortification with iron and zinc sprinkles or iron sprinkles alone successfully treats anemia in infants and young children.** *The Journal of nutrition* 2003, **133**(4):1075.
89. Chen K, Zhang X, Li T, Chen L, Wei X, Qu P, Liu Y: **Effect of vitamin A, vitamin A plus iron and multiple micronutrient-fortified seasoning powder on infectious morbidity of preschool children.** *Nutrition* 2011.
90. Chen K, Li TY, Chen L, Qu P, Liu YX: **Effects of vitamin A, vitamin A plus iron and multiple micronutrient-fortified seasoning powder on preschool children in a suburb of Chongqing, China.** *Journal of nutritional science and vitaminology* 2008, **54**(6):440-447.
91. Faber M, Kvalsvig JD, Lombard CJ, Benade AJ: **Effect of a fortified maize-meal porridge on anemia, micronutrient status, and motor development of infants.** *The American journal of clinical nutrition* 2005, **82**(5):1032.

92. Gershoff SN, McGandy RB, Suttapreyasri D, Promkutkao C, Nondasuta A, Pisolyabutra U, Tantiwongse P, Viravaidhaya V: **Nutrition studied in Thailand. II. Effects of fortification of rice with lysine, threonine, thiamin, riboflavin, vitamin A, and iron on preschool children.** *The American journal of clinical nutrition* 1977, **30**(7):1185.
93. Gibson RS, Kafwembe E, Mwanza S, Gosset L, Bailey KB, Mullen A, Baisley K, Filteau S: **A Micronutrient-Fortified Food Enhances Iron and Selenium Status of Zambian Infants but Has Limited Efficacy on Zinc.** *The Journal of nutrition* 2011, **141**(5):935.
94. Goyle A, Prakash S: **Effect of supplementation of micronutrient fortified biscuits on haemoglobin and serum iron levels of adolescent girls from Jaipur city, India.** *Nutrition & Food Science* 2010, **40**(5):477-484.
95. Kumar MV, Rajagopalan S: **Multiple micronutrient fortification of salt and its effect on cognition in Chennai school children.** *Asia Pac J Clin Nutr* 2007, **16**(3):505-511.
96. Kuusipalo H, Maleta K, Briend A, Manary M, Ashorn P: **Growth and change in blood haemoglobin concentration among underweight Malawian infants receiving fortified spreads for 12 weeks: a preliminary trial.** *Journal of pediatric gastroenterology and nutrition* 2006, **43**(4):525.
97. Lartey A, Manu A, Brown KH, Peerson JM, Dewey KG: **A randomized, community-based trial of the effects of improved, centrally processed complementary foods on growth and micronutrient status of Ghanaian infants from 6 to 12 mo of age.** *The American journal of clinical nutrition* 1999, **70**(3):391.
98. Layrisse M, Chaves JF: **Early response to the effect of iron fortification in the Venezuelan population.** *The American journal of clinical nutrition* 1996, **64**(6):903.
99. Lein, Shigeru Y, te Biesebeke R: **Impact of milk consumption on performance and health of primary school children in rural Vietnam.** *Asia Pac J Clin Nutr* 2009, **18**(3):326-334.
100. Lin J, Lee I: **Plasma folate, vitamin B-6, vitamin B-12, and risk of breast cancer in women.** *The American journal of clinical nutrition* 2008, **87**(3):734.
101. Liu D, Bates CJ, Yin TA, Wang XB, Lu C: **Nutritional efficacy of a fortified weaning rusk in a rural area near Beijing [published erratum appears in Am J Clin Nutr 1993 Oct; 58 (4): 582].** *The American journal of clinical nutrition* 1993, **57**(4):506.
102. Lopriore C, Guidoum Y, Briend A, Branca F: **Spread fortified with vitamins and minerals induces catch-up growth and eradicates severe anemia in stunted refugee children aged 3–6 y.** *The American journal of clinical nutrition* 2004, **80**(4):973.
103. Loui A, Raab A, Wagner M, Weigel H, Grütters-Kieslich A, Brätter P, Obladen M: **Nutrition of very low birth weight infants fed human milk with or without supplemental trace elements: a randomized controlled trial.** *Journal of pediatric gastroenterology and nutrition* 2004, **39**(4):346.
104. Lucas A, Fewtrell MS, Morley R, Lucas PJ, Baker BA, Lister G, Bishop NJ: **Randomized outcome trial of human milk fortification and developmental outcome in preterm infants.** *The American journal of clinical nutrition* 1996, **64**(2):142.
105. Lutter CK, Rodríguez A, Fuenmayor G, Avila L, Sempertegui F, Escobar J: **Growth and micronutrient status in children receiving a fortified complementary food.** *The Journal of nutrition* 2007, **138**(2):379.
106. Manger MS, McKenzie JE, Winichagoon P, Gray A, Chavasit V, Pongcharoen T, Gowachirapant S, Ryan B, Wasantwisut E, Gibson RS: **A micronutrient-fortified seasoning powder reduces morbidity and improves short-term cognitive function, but has no effect on**

- anthropometric measures in primary school children in northeast Thailand: a randomized controlled trial.** *The American journal of clinical nutrition* 2008, **87**(6):1715.
107. Manno D, Kowa PK, Bwalya HK, Siame J, Grantham-McGregor S, Baisley K, De Stavola BL, Jaffar S, Filteau S: **Rich micronutrient fortification of locally produced infant food does not improve mental and motor development of Zambian infants: a randomised controlled trial.** *British Journal of Nutrition* 2011, **1**(1):1-11.
108. Morgan EJ, Heath ALM, Szymlek-Gay EA, Gibson RS, Gray AR, Bailey KB, Ferguson EL: **Red Meat and a Fortified Manufactured Toddler Milk Drink Increase Dietary Zinc Intakes without Affecting Zinc Status of New Zealand Toddlers.** *The Journal of nutrition* 2010, **140**(12):2221.
109. Nesamvuni AE, Vorster HH, Margetts BM, Kruger A: **Fortification of maize meal improved the nutritional status of 1–3-year-old African children.** *Public health nutrition* 2005, **8**(05):461-467.
110. Nga TT, Winichagoon P, Dijkhuizen MA, Khan NC, Wasantwisut E, Furr H, Wieringa FT: **Multi-Micronutrient–Fortified Biscuits Decreased Prevalence of Anemia and Improved Micronutrient Status and Effectiveness of Deworming in Rural Vietnamese School Children.** *The Journal of nutrition* 2009, **139**(5):1013.
111. Osei AK, Rosenberg IH, Houser RF, Bulusu S, Mathews M, Hamer DH: **Community-level micronutrient fortification of school lunch meals improved vitamin A, folate, and iron status of schoolchildren in Himalayan villages of India.** *The Journal of nutrition* 2010, **140**(6):1146.
112. Ouédraogo HZ, Traoré T, Zèba AN, Dramaix-Wilmet M, Hennart P, Donnen P: **Effect of an improved local ingredient-based complementary food fortified or not with iron and selected multiple micronutrients on Hb concentration.** *Public health nutrition* 2006, **1**(-1):1-8.
113. Van Phu P, Van Hoan N, Salvignol B, Treche S, Wieringa FT, Khan NC, Tuong PD, Berger J: **Complementary Foods Fortified with Micronutrients Prevent Iron Deficiency and Anemia in Vietnamese infants.** *The Journal of nutrition* 2010, **140**(12):2241.
114. Rivera JA, Shamah T, Villalpando S, Monterrubio E: **Effectiveness of a large-scale iron-fortified milk distribution program on anemia and iron deficiency in low-income young children in Mexico.** *The American journal of clinical nutrition* 2010, **91**(2):431.
115. Sazawal S, Dhingra U, Dhingra P, Hiremath G, Sarkar A, Dutta A, Menon VP, Black RE: **Micronutrient fortified milk improves iron status, anemia and growth among children 1–4 years: a double masked, randomized, controlled trial.** *PloS one* 2010, **5**(8):e12167.
116. Seal A, Kafwembe E, Kassim IAR, Hong M, Wesley A, Wood J, Abdalla F, van den Briel T: **Maize meal fortification is associated with improved vitamin A and iron status in adolescents and reduced childhood anaemia in a food aid-dependent refugee population.** *Public health nutrition* 2007, **11**(07):720-728.
117. Stekel A, Olivares M, Cayazzo M, Chadud P, Llaguno S, Pizarro F: **Prevention of iron deficiency by milk fortification. II. A field trial with a full-fat acidified milk.** *The American journal of clinical nutrition* 1988, **47**(2):265.
118. Van Stuijvenberg ME, Dhansay MA, Smuts CM, Lombard CJ, Jogessar VB, Benadé AJ: **Long-term evaluation of a micronutrient-fortified biscuit used for addressing micronutrient deficiencies in primary school children.** *Public health nutrition* 2001, **4**(6):1201-1210.
119. Torrejón CS, Castillo-Durán C, Hertrampf ED, Ruz M: **Zinc and iron nutrition in Chilean children fed fortified milk provided by the complementary national food program\* 1.** *Nutrition* 2004, **20**(2):177-180.



120. Varma JL, Das S, Sankar R, Mannar MG, Levinson FJ, Hamer DH: **Community-level micronutrient fortification of a food supplement in India: a controlled trial in preschool children aged 36-66 mo.** *The American journal of clinical nutrition* 2007, **85**(4):1127.
121. Villalpando S, Shamah T, Rivera JA, Lara Y, Monterrubio E: **Fortifying milk with ferrous gluconate and zinc oxide in a public nutrition program reduced the prevalence of anemia in toddlers.** *The Journal of nutrition* 2006, **136**(10):2633.
122. Winichagoon P, McKenzie JE, Chavasit V, Pongcharoen T, Gowachirapant S, Boonpradern A, Manger MS, Bailey KB, Wasantwisut E, Gibson RS: **A multimicronutrient-fortified seasoning powder enhances the hemoglobin, zinc, and iodine status of primary school children in North East Thailand: a randomized controlled trial of efficacy.** *The Journal of nutrition* 2006, **136**(6):1617.
123. Andersson M, Theis W, Zimmermann MB, Foman JT, Jakel M, Duchateau GS, Frenken LG, Hurrell RF: **Random serial sampling to evaluate efficacy of iron fortification: a randomized controlled trial of margarine fortification with ferric pyrophosphate or sodium iron edetate.** *Am J Clin Nutr* 2010, **92**(5):1094-1104.
124. Biebinger R, Zimmermann MB, Al-Hooti SN, Al-Hamed N, Al-Salem E, Zafar T, Kabir Y: **Efficacy of wheat-based biscuits fortified with microcapsules containing ferrous sulfate and potassium iodate or a new hydrogen-reduced elemental iron: a randomised, double-blind, controlled trial in Kuwaiti women.** *British Journal of Nutrition* 2009, **102**(09):1362-1369.
125. Blanco-Rojo R, Perez-Granados AM, Toxqui L, Zazo P, de la Piedra C, Vaquero MP: **Relationship between vitamin D deficiency, bone remodelling and iron status in iron-deficient young women consuming an iron-fortified food.** *European journal of nutrition* 2012.
126. Blanco-Rojo R, Pérez-Granados AM, Toxqui L, González-Vizcayno C, Delgado MA, Vaquero MP: **Efficacy of a microencapsulated iron pyrophosphate-fortified fruit juice: a randomised, double-blind, placebo-controlled study in Spanish iron-deficient women.** *British Journal of Nutrition* 2011, **105**(11):1652-1659.
127. Hoa PT, Khan NC, van Beusekom C, Gross R, Conde WL, Khoi HD: **Milk fortified with iron or iron supplementation to improve nutritional status of pregnant women: An intervention trial from rural Vietnam.** *Food & Nutrition Bulletin* 2005, **26**(1):32-38.
128. Hotz C, Porcayo M, Onofre G, García-a-Guerra A, Elliott T, Jankowski S, Greiner T: **Efficacy of iron-fortified Ultra Rice in improving the iron status of women in Mexico.** *Food & Nutrition Bulletin* 2008, **29**(2):140-149.
129. Karl JP, Lieberman HR, Cable SJ, Williams KW, Young AJ, McClung JP: **Randomized, double-blind, placebo-controlled trial of an iron-fortified food product in female soldiers during military training: relations between iron status, serum hepcidin, and inflammation.** *American Journal of Clinical Nutrition* 2010, **92**(1):93.
130. Sadighi J, Sheikholeslam R, Mohammad K, Pouraram H, Abdollahi Z, Samadpour K, Kolahdooz F, Naghavi M: **Flour fortification with iron: a mid-term evaluation.** *Public health* 2008, **122**(3):313-321.
131. Sadighi J, Mohammad K, Sheikholeslam R, Amirkhani MA, Torabi P, Salehi F, Abdolahi Z: **Anaemia control: lessons from the flour fortification programme.** *Public health* 2009, **123**(12):794-799.
132. Thuy PV, Berger J, Davidsson L, Khan NC, Lam NT, Cook JD, Hurrell RF, Khoi HH: **Regular consumption of NaFeEDTA-fortified fish sauce improves iron status and reduces the prevalence of anemia in anemic Vietnamese women.** *American Journal of Clinical Nutrition* 2003, **78**(2):284-290.
133. Van Thuy P, Berger J, Nakanishi Y, Khan NC, Lynch S, Dixon P: **The use of NaFeEDTA-fortified fish sauce is an effective tool for controlling iron deficiency in women of childbearing age in rural Vietnam.** *Journal of Nutrition* 2005, **135**(11):2596.

134. Zimmermann MB, Winichagoon P, Gowachirapant S, Hess SY, Harrington M, Chavasit V, Lynch SR, Hurrell RF: **Comparison of the efficacy of wheat-based snacks fortified with ferrous sulfate, electrolytic iron, or hydrogen-reduced elemental iron: randomized, double-blind, controlled trial in Thai women.** *Am J Clin Nutr* 2005, **82**(6):1276-1282.
135. Badii A, Nekouei N, Fazilati M, Shahedi M, Badii S: **Effect of Consuming Zinc-fortified Bread on Serum Zinc and Iron Status of Zinc-deficient Women: A Double Blind, Randomized Clinical Trial.** *International journal of preventive medicine* 2012, **3**(Suppl 1):S124-130.
136. Alasfoor D, Elsayed DRMK, Mohammed ALIJ: **SPINA BIFIDA AND BIRTH OUTCOME BEFORE AND AFTER FORTIFICATION OF WHITE FLOUR WITH IRON AND FOLIC ACID IN OMAN.** 2010.
137. Amarin ZO, Obeidat AZ: **Effect of folic acid fortification on the incidence of neural tube defects.** *Paediatric and perinatal epidemiology* 2010, **24**(4):349-351.
138. Bar-Oz B, Koren G, Nguyen P, Kapur BM: **Folate fortification and supplementation--Are we there yet?** *Reproductive Toxicology* 2008, **25**(4):408-412.
139. Bol KA, Collins JS, Kirby RS: **Survival of infants with neural tube defects in the presence of folic acid fortification.** *Pediatrics* 2006, **117**(3):803.
140. Boulet SL, Yang Q, Mai C, Kirby RS, Collins JS, Robbins JM, Meyer R, Canfield MA, Mulinare J: **Trends in the postfortification prevalence of spina bifida and anencephaly in the United States.** *Birth Defects Research Part A: Clinical and Molecular Teratology* 2008, **82**(7):527-532.
141. Canfield MA, Mai CT, Kirby RS, Pearson K, Devine O, Mulinare J: **Changes in the birth prevalence of selected birth defects after grain fortification with folic acid in the United States: findings from a multi-state population-based study.** *Birth Defects Research (Part A): Clinical and Molecular Teratology* 2005, **73**:679-689.
142. Chen LT, Rivera MA: **The Costa Rican experience: reduction of neural tube defects following food fortification programs.** *Nutrition Reviews* 2004, **62**:S40-S43.
143. Chen BH, Carmichael SL, Selvin S, Abrams B, Shaw GM: **NTD prevalences in central California before and after folic acid fortification.** *Birth Defects Research Part A: Clinical and Molecular Teratology* 2008, **82**(8):547-552.
144. Hertrampf E, Cortés F, Erickson JD, Cayazzo M, Freire W, Bailey LB, Howson C, Kauwell G, Pfeiffer C: **Consumption of folic acid-fortified bread improves folate status in women of reproductive age in Chile.** *The Journal of nutrition* 2003, **133**(10):3166.
145. Honein MA, Paulozzi LJ, Mathews TJ, Erickson JD, Wong LYC: **Impact of folic acid fortification of the US food supply on the occurrence of neural tube defects.** *JAMA: The Journal of the American Medical Association* 2001, **285**(23):2981.
146. Ionescu-Ittu R, Marelli AJ, Mackie AS, Pilote L: **Prevalence of severe congenital heart disease after folic acid fortification of grain products: time trend analysis in Quebec, Canada.** *BMJ: British Medical Journal* 2009, **338**.
147. Kucik J, Correa A: **Trends in twinning rates in metropolitan Atlanta before and after folic acid fortification.** *Journal of reproductive medicine* 2004, **49**(9):707-712.
148. Lawrence JM, Watkins ML, Chiu V, Erickson JD, Petitti DB: **Food fortification with folic acid and rate of multiple births, 1994-2000.** *Birth Defects Research Part A: Clinical and Molecular Teratology* 2004, **70**(12):948-952.

149. Liu S, West R, Randell E, Longerich L, O'Connor K, Scott H, Crowley M, Lam A, Prabhakaran V, McCourt C: **A comprehensive evaluation of food fortification with folic acid for the primary prevention of neural tube defects.** *BMC pregnancy and childbirth* 2004, **4**(1):20.
150. López Camelo JS, Orioli IM, Dutra MG, Nazer Herrera J, Rivera N, Ojeda ME, Canessa A, Wettig E, Fontannaz AM, Mellado C: **Reduction of birth prevalence rates of neural tube defects after folic acid fortification in Chile.** *American Journal of Medical Genetics Part A* 2005, **135**(2):120-125.
151. Modjadji SE, Alberts M, Mamabolo RL: **Folate and iron status of South African non-pregnant rural women of childbearing age, before and after fortification of foods.** *South African Journal of Clinical Nutrition* 2008, **20**(3):89-93.
152. Murphy M, Whiteman D, Stone D, Botting B, Schorah C, Wild J: **Dietary folate and the prevalence of neural tube defects in the British Isles: the past two decades.** *BJOG: An International Journal of Obstetrics & Gynaecology* 2000, **107**(7):885-889.
153. Orioli IM, Lima do Nascimento R, López Camelo JS, Castilla EE: **Effects of folic acid fortification on spina bifida prevalence in Brazil.** *Birth Defects Research Part A: Clinical and Molecular Teratology* 2011.
154. Pacheco SS, Braga C, Souza AI, Figueiroa JN: **Effects of folic acid fortification on the prevalence of neural tube defects.** *Revista de Saúde Pública* 2009, **43**(4):565-571.
155. Persad VL, Van den Hof MC, Dubé JM, Zimmer P: **Incidence of open neural tube defects in Nova Scotia after folic acid fortification.** *Canadian Medical Association Journal* 2002, **167**(3):241.
156. Ray JG: **Folic acid food fortification in Canada.** *Nutrition Reviews* 2004, **62**:S35-S39.
157. Ray JG, Meier C, Vermeulen MJ, Cole DEC, Wyatt PR: **Prevalence of trisomy 21 following folic acid food fortification.** *American Journal of Medical Genetics Part A* 2003, **120**(3):309-313.
158. Robbins JM, Tilford JM, Bird TM, Cleves MA, Reading JA, Hobbs CA: **Hospitalizations of newborns with folate-sensitive birth defects before and after fortification of foods with folic acid.** *Pediatrics* 2006, **118**(3):906.
159. Safdar OY, Al-Dabbagh AA, AbuElieneen WA, Kari JA: **Decline in the incidence of neural tube defects after the national fortification of flour (1997-2005).** *Saudi medical journal* 2007, **28**(8):1227.
160. Sayed AR, Bourne D, Pattinson R, Nixon J, Henderson B: **Decline in the prevalence of neural tube defects following folic acid fortification and its cost benefit in South Africa.** *Birth Defects Research Part A: Clinical and Molecular Teratology* 2008, **82**(4):211-216.
161. Shaw GM, Carmichael SL, Nelson V, Selvin S, Schaffer DM: **Food fortification with folic acid and twinning among California infants.** *American Journal of Medical Genetics Part A* 2003, **119**(2):137-140.
162. Signore C, Mills JL, Cox C, Trumble AC: **Effects of folic acid fortification on twin gestation rates.** *Obstetrics & Gynecology* 2005, **105**(4):757.
163. Simmons CJ, Mosley BS, Fulton Bond CA, Hobbs CA: **Birth defects in Arkansas: is folic acid fortification making a difference?** *Birth Defects Research Part A: Clinical and Molecular Teratology* 2004, **70**(9):559-564.
164. Waller DK, Tita ATN, Annegers JF: **Rates of twinning before and after fortification of foods in the US with folic acid, Texas, 1996 to 1998.** *Paediatric and perinatal epidemiology* 2003, **17**(4):378-383.
165. Williams LJ, Mai CT, Edmonds LD, Shaw GM, Kirby RS, Hobbs CA, Sever LE, Miller LA, Meaney FJ, Levitt M: **Prevalence of spina bifida and anencephaly during the transition to mandatory folic acid fortification in the United States.** *Teratology* 2002, **66**(1):33-39.

166. Adolphi B, Scholz-Ahrens KE, de Vrese M, Açil Y, Laue C, Schrezenmeir J: **Short-term effect of bedtime consumption of fermented milk supplemented with calcium, inulin-type fructans and caseinphosphopeptides on bone metabolism in healthy, postmenopausal women.** *European journal of nutrition* 2009, **48**(1):45-53.
167. Bonjour JP, Benoit V, Pourchaire O, Ferry M, Rousseau B, Souberbielle JC: **Inhibition of markers of bone resorption by consumption of vitamin D and calcium-fortified soft plain cheese by institutionalised elderly women.** *British Journal of Nutrition* 2009, **102**(07):962-966.
168. Chee WSS, Suriah AR, Chan SP, Zaitun Y, Chan YM: **The effect of milk supplementation on bone mineral density in postmenopausal Chinese women in Malaysia.** *Osteoporosis International* 2003, **14**(10):828-834.
169. Ferrar L, van der Hee RM, Berry M, Watson C, Miret S, Wilkinson J, Bradburn M, Eastell R: **Effects of calcium-fortified ice cream on markers of bone health.** *Osteoporosis International* 2010:1-11.
170. Green TJ, Skeaff CM, Rockell JE: **Milk fortified with the current adequate intake for vitamin D (5 g) increases serum 25-hydroxyvitamin D compared to control milk but is not sufficient to prevent a seasonal decline in young women.** *Asia Pacific journal of clinical nutrition* 2010, **19**(2):195-199.
171. Kruger MC, Booth CL, Coad J, Schollum LM, Kuhn-Sherlock B, Shearer MJ: **Effect of calcium fortified milk supplementation with or without vitamin K on biochemical markers of bone turnover in premenopausal women.** *Nutrition* 2006, **22**(11-12):1120-1128.
172. Kruger MC, Schollum LM, Kuhn-Sherlock B, Hestiantoro A, Wijanto P, Li-Yu J, Agdeppa I, Todd JM, Eastell R: **The effect of a fortified milk drink on vitamin D status and bone turnover in post-menopausal women from South East Asia.** *Bone* 2010, **46**(3):759-767.
173. Lau EM, Woo J, Lam V, Hong A: **Milk supplementation of the diet of postmenopausal Chinese women on a low calcium intake retards bone loss.** *Journal of bone and mineral research : the official journal of the American Society for Bone and Mineral Research* 2001, **16**(9):1704-1709.
174. Manios Y, Moschonis G, Panagiotakos DB, Farajian P, Trovas G, Lyritis GP: **Changes in biochemical indices of bone metabolism in post menopausal women following a dietary intervention with fortified dairy products.** *Journal of Human Nutrition and Dietetics* 2009, **22**(2):156-165.
175. Moschonis G, Manios Y: **Skeletal site-dependent response of bone mineral density and quantitative ultrasound parameters following a 12-month dietary intervention using dairy products fortified with calcium and vitamin D: the Postmenopausal Health Study.** *British Journal of Nutrition* 2006, **96**(06):1140-1148.
176. Natri AM, Salo P, Vikstedt T, Palssa A, Huttunen M, Kärkkäinen MUM, Salovaara H, Piironen V, Jakobsen J, Lamberg-Allardt CJ: **Bread fortified with cholecalciferol increases the serum 25-hydroxyvitamin D concentration in women as effectively as a cholecalciferol supplement.** *The Journal of nutrition* 2006, **136**(1):123.
177. Recker RR, Heaney RP: **The effect of milk supplements on calcium metabolism, bone metabolism and calcium balance.** *The American journal of clinical nutrition* 1985, **41**(2):254.
178. Storm D, Porter REES, Musgrave K, Vereault D, Patton C, Kessenich C, Mohan S, Chen T, Holick MF, Rosen CJ: **Calcium supplementation prevents seasonal bone loss and changes in biochemical markers of bone turnover in elderly New England women: a randomized placebo-controlled trial.** *Journal of Clinical Endocrinology & Metabolism* 1998, **83**(11):3817.

179. Tenta R, Moschonis G, Koutsilieris M, Manios Y: **Calcium and vitamin D supplementation through fortified dairy products counterbalances seasonal variations of bone metabolism indices: the Postmenopausal Health Study.** *European journal of nutrition* 2010:1-9.
180. Burgess JR, Seal JA, Stilwell GM, Reynolds PJ, Taylor ER, Parameswaran V: **A case for universal salt iodisation to correct iodine deficiency in pregnancy: another salutary lesson from Tasmania.** *Medical journal of Australia* 2007, **186**(11):574.
181. Camargo RYA, Tomimori EK, Neves SC, Gs R: **Thyroid and the environment: exposure to excessive nutritional iodine increases the prevalence of thyroid disorders in Sao Paulo, Brazil.** *European Journal of Endocrinology* 2008, **159**(3):293.
182. Carle A, Laurberg P, Pedersen IB, Knudsen N, Perrild H, Ovesen L, Rasmussen LB, Jorgensen T: **Epidemiology of subtypes of hypothyroidism in Denmark.** *European Journal of Endocrinology* 2006, **154**(1):21.
183. Cerqueira C, Knudsen N, Ovesen L, Perrild H, Rasmussen LB, Laurberg P, Jorgensen T: **Association of Iodine Fortification with Incident Use of Antithyroid Medication--A Danish Nationwide Study.** *Journal of Clinical Endocrinology & Metabolism* 2009, **94**(7):2400.
184. Cerqueira C, Knudsen N, Ovesen L, Laurberg P, Perrild H, Rasmussen LB, Jørgensen T: **Doubling in the use of thyroid hormone replacement therapy in Denmark: association to iodization of salt?** *European Journal of Epidemiology* 2011:1-7.
185. Laurberg P, Jorgensen T, Perrild H, Ovesen L, Knudsen N, Pedersen IB, Rasmussen LB, Carle A, Vejbjerg P: **The Danish investigation on iodine intake and thyroid disease, DanThyr: status and perspectives.** *European Journal of Endocrinology* 2006, **155**(2):219.
186. Moleti M, Lo Presti VP, Campolo MC, Mattina F, Galletti M, Mandolino M, Violi MA, Giorgianni G, De Domenico D, Trimarchi F: **Iodine prophylaxis using iodized salt and risk of maternal thyroid failure in conditions of mild iodine deficiency.** *Journal of Clinical Endocrinology & Metabolism* 2008, **93**(7):2616.
187. Moleti M, Di Bella B, Giorgianni G, Mancuso A, De Vivo A, Alibrandi A, Trimarchi F, Vermiglio F: **MATERNAL THYROID FUNCTION IN DIFFERENT CONDITIONS OF IODINE NUTRITION IN PREGNANT WOMEN EXPOSED TO MILD MODERATE IODINE DEFICIENCY: AN OBSERVATIONAL STUDY.** *Clinical endocrinology* 2011.
188. Bülow Pedersen I, Laurberg P, Knudsen N, Jørgensen T, Perrild H, Ovesen L, Rasmussen LB: **An increased incidence of overt hypothyroidism after iodine fortification of salt in Denmark: a prospective population study.** *Journal of Clinical Endocrinology & Metabolism* 2007, **92**(8):3122.
189. Bülow PI, Knudsen N, Carlé A, Vejbjerg P, Jørgensen T, Perrild H, Ovesen L, Banke RL, Laurberg P: **A cautious iodization program bringing iodine intake to a low recommended level is associated with an increase in the prevalence of thyroid autoantibodies in the population.** *Clinical endocrinology.*
190. Rasmussen LB, Carlé A, Jørgensen T, Knudsen N, Laurberg P, Pedersen IB, Perrild H, Vejbjerg P, Ovesen L: **Iodine intake before and after mandatory iodization in Denmark: results from the Danish Investigation of Iodine Intake and Thyroid Diseases (DanThyr) study.** *British Journal of Nutrition* 2008, **100**(01):166-173.
191. Seal JA, Doyle Z, Burgess JR, Taylor R, Cameron AR: **Iodine status of Tasmanians following voluntary fortification of bread with iodine.** *Medical journal of Australia* 2007, **186**(2):69.
192. Sebotsa MLD, Dannhauser A, Jooste PL, Joubert G: **Iodine status as determined by urinary iodine excretion in Lesotho two years after introducing legislation on universal salt iodization.** *Nutrition* 2005, **21**(1):20-24.

193. Sultanalieva RB, Mamutova S, van der Haar F: **The current salt iodization strategy in Kyrgyzstan ensures sufficient iodine nutrition among school-age children but not pregnant women.** *Public health nutrition* 2010, **13**(05):623-630.
194. Vejbjerg P, Knudsen N, Perrild H, Carle A, Laurberg P, Pedersen IB, Rasmussen LB, Ovesen L, Jorgensen T: **Effect of a mandatory iodization program on thyroid gland volume based on individuals' age, gender, and preceding severity of dietary iodine deficiency: a prospective, population-based study.** *Journal of Clinical Endocrinology & Metabolism* 2007, **92**(4):1397.
195. Vejbjerg P, Knudsen N, Perrild H, Laurberg P, Carlé A, Pedersen IB, Rasmussen LB, Ovesen L, Jørgensen T: **Lower prevalence of mild hyperthyroidism related to a higher iodine intake in the population: prospective study of a mandatory iodization programme.** *Clinical endocrinology* 2009, **71**(3):440-445.
196. Viteri FE, Alvarez E, Batres R, Torun B, Pineda O, Mejia LA, Sylvi J: **Fortification of sugar with iron sodium ethylenediaminetetraacetate (FeNaEDTA) improves iron status in semirural Guatemalan populations.** *Am J Clin Nutr* 1995, **61**(5):1153-1163.
197. Adu-Afarwuah S, Lartey A, Brown KH, Zlotkin S, Briend A, Dewey KG: **Randomized comparison of 3 types of micronutrient supplements for home fortification of complementary foods in Ghana: effects on growth and motor development.** *The American journal of clinical nutrition* 2007, **86**(2):412.
198. Huo J, Sun J, Huang J, Li W, Wang L, Selenje L, Gleason GR, Yu X: **The effectiveness of fortified flour on micro-nutrient status in rural female adults in China.** *Asia Pacific journal of clinical nutrition* 2011, **20**(1):118.
199. Mardones F, Urrutia MT, Villarroel L, Rioseco A, Castillo O, Rozowski J, Tapia JL, Bastias G, Bacallao J, Rojas I: **Effects of a dairy product fortified with multiple micronutrients and omega-3 fatty acids on birth weight and gestation duration in pregnant Chilean women.** *Public health nutrition* 2008, **11**(1):30-40.
200. Tapola NS, Karvonen HM, Niskanen LK, Sarkkinen ES: **Mineral water fortified with folic acid, vitamins B6, B12, D and calcium improves folate status and decreases plasma homocysteine concentration in men and women.** *European Journal of Clinical Nutrition* 2004, **58**(2):376-385.
201. Tucker KL, Olson B, Bakun P, Dallal GE, Selhub J, Rosenberg IH: **Breakfast cereal fortified with folic acid, vitamin B-6, and vitamin B-12 increases vitamin concentrations and reduces homocysteine concentrations: a randomized trial.** *The American journal of clinical nutrition* 2004, **79**(5):805.
