# Supplementary material for: Micronutrient fortification of food and its impact on woman and child health: a systematic review
Source: PubMed Central journal article supplement (PMC3765883; doi:10.1186/2046-4053-2-67), 2013-08-23
Supplement: 2046-4053-2-67-S3.pdf [file 2046-4053-2-67-S3.pdf]

Table S1. Effect of food fortification with various micronutrients on health outcomes in Children

| Outcomes                                 | Illustrative comparative risks* [95% CI]                                                                                                     | Relative effect [95% CI]             | No of Participants (studies) | Quality of the evidence (GRADE)            | Comments                                |
|------------------------------------------|----------------------------------------------------------------------------------------------------------------------------------------------|--------------------------------------|------------------------------|--------------------------------------------|-----------------------------------------|
| <b>Iron Fortification</b>                |                                                                                                                                              |                                      |                              |                                            |                                         |
| <b>Hemoglobin Levels</b>                 | The mean hemoglobin levels in the intervention groups was <b>0.55 standard deviations higher</b> (0.34 to 0.76 higher)                       |                                      | 6267 (30)                    | ⊕⊕⊕⊖ <sup>1,2</sup><br><b>moderate</b>     | <b>SMD: 0.55 [95% CI: 0.34, 0.76]</b>   |
| <b>Serum Ferritin Levels</b>             | The mean serum ferritin in the intervention groups was <b>0.91 standard deviations higher</b> (0.38 to 1.44 higher)                          |                                      | 1507 (7)                     | ⊕⊕⊕⊖ <sup>1,2</sup><br><b>moderate</b>     | <b>SMD: 0.91 [95% CI: 0.38, 1.44]</b>   |
| <b>Effect on Anemia</b>                  | Iron fortification reduced the prevalence of anemia by 45%                                                                                   | <b>RR: 0.55 [95% CI: 0.42, 0.72]</b> | 3651 (17)                    | ⊕⊕⊕⊖ <sup>1,2</sup><br><b>moderate</b>     |                                         |
| <b>Zinc Fortification</b>                |                                                                                                                                              |                                      |                              |                                            |                                         |
| <b>Serum Zinc Levels</b>                 | The mean serum zinc levels in the intervention groups was <b>1.28 standard deviations higher</b> (0.56 to 2.01 higher)                       |                                      | 683 (9)                      | ⊕⊕⊕⊖ <sup>1,2</sup><br><b>moderate</b>     | <b>SMD: 1.28 [95% CI: 0.56, 2.01]</b>   |
| <b>Hemoglobin Levels</b>                 | The mean hemoglobin levels in the intervention groups was <b>0.11 standard deviations lower</b> (0.52 lower to 0.31 higher)                  |                                      | 92 (3)                       | ⊕⊕⊖⊖ <sup>1,2,4</sup><br><b>low</b>        | <b>SMD: -0.11 [95% CI: -0.52, 0.31]</b> |
| <b>Serum Copper Levels</b>               | The mean serum copper levels in the intervention groups was <b>0.57 standard deviations higher</b> (0.91 lower to 2.06 higher)               |                                      | 161 (4)                      | ⊕⊖⊖⊖ <sup>1,2,4,5</sup><br><b>very low</b> | <b>SMD: 0.57 [95% CI: -0.91, 2.06]</b>  |
| <b>Serum Alkaline Phosphatase Levels</b> | The mean serum alkaline phosphatase levels in the intervention groups was <b>0.94 standard deviations higher</b> (0.29 lower to 2.17 higher) |                                      | 119                          | ⊕⊕⊖⊖ <sup>1,2,4</sup><br><b>low</b>        | <b>SMD: 0.94 [95% CI: -0.29, 2.17]</b>  |

|                                      |                                                                                                                                    |                                      |             |                                        |                                        |
|--------------------------------------|------------------------------------------------------------------------------------------------------------------------------------|--------------------------------------|-------------|----------------------------------------|----------------------------------------|
|                                      | higher)                                                                                                                            |                                      | (3)         | <b>low</b>                             |                                        |
| <b>Weight Gain</b>                   | The mean weight gain in the intervention groups was <b>0.50 standard deviations higher</b> (0.12 lower to 1.11 higher)             |                                      | 419<br>(6)  | ⊕⊕⊕⊖ <sup>1,2</sup><br><b>moderate</b> | <b>SMD: 0.50 [95% CI: -0.12, 1.11]</b> |
| <b>Height Growth</b>                 | The mean height growth levels in the intervention groups was <b>0.52 standard deviations higher</b> (0.01 to 1.04 higher)          |                                      | 451<br>(7)  | ⊕⊕⊕⊖ <sup>1,2</sup><br><b>moderate</b> | <b>SMD: 0.52 [95% CI: 0.01, 1.04]</b>  |
| <b>Iodine Fortification</b>          |                                                                                                                                    |                                      |             |                                        |                                        |
| <b>Serum thyroxin levels</b>         | The mean serum thyroxin levels in the intervention groups was <b>0.45 standard deviations higher</b> (1.15 lower to 2.06 higher)   |                                      | 1131<br>(2) | ⊕⊕⊖⊖ <sup>1,2,3</sup><br><b>low</b>    | <b>SMD: 0.45 [95% CI: -1.15, 2.06]</b> |
| <b>Urinary iodine concentrations</b> | The mean urinary iodine concentration in the intervention groups was <b>6.39 standard deviations higher</b> (2.69 to 10.08 higher) |                                      | 1016<br>(2) | ⊕⊕⊕⊖ <sup>1,2</sup><br><b>moderate</b> | <b>SMD: 6.39 [95% CI: 2.69, 10.08]</b> |
| <b>Vitamin A fortification</b>       |                                                                                                                                    |                                      |             |                                        |                                        |
| <b>Hemoglobin Levels</b>             | The mean serum hemoglobin levels in the intervention groups was <b>0.48 standard deviations higher</b> (0.07 to 0.89 higher)       |                                      | 1538<br>(2) | ⊕⊕⊖⊖ <sup>3,6</sup><br><b>low</b>      | <b>SMD: 0.48 [95% CI: 0.07, 0.89]</b>  |
| <b>Serum Vitamin A Concentration</b> | The mean serum vitamin A concentration in the intervention groups was <b>0.61 standard deviations higher</b> (0.39 to 0.83 higher) |                                      | 2362<br>(3) | ⊕⊕⊖⊖ <sup>3,6</sup><br><b>low</b>      | <b>SMD: 0.61 [95% CI: 0.39, 0.83]</b>  |
| <b>Vitamin A Deficiency</b>          | Vitamin A fortification reduced prevalence of vitamin A deficiency by 61%                                                          | <b>RR: 0.39 [95% CI: 0.09, 1.74]</b> | 1465<br>(2) | ⊕⊕⊕⊖ <sup>6</sup><br><b>moderate</b>   |                                        |

**Calcium and Vitamin D fortification**

|                               |                                                                                                                                    |             |                                        |                                          |
|-------------------------------|------------------------------------------------------------------------------------------------------------------------------------|-------------|----------------------------------------|------------------------------------------|
| <b>Serum PTH Levels</b>       | The mean serum PTH levels in the intervention groups was <b>0.40 standard deviations lower</b> (0.56 to 0.24 lower)                | 637<br>(2)  | ⊕⊕⊖⊖ <sup>1,2,3</sup><br><b>low</b>    | <b>SMD: -0.40 [95% CI: -0.56, -0.24]</b> |
| <b>Serum Vitamin D Levels</b> | The mean serum vitamin D concentration in the intervention groups was <b>1.23 standard deviations higher</b> (0.35 to 2.11 higher) | 1119<br>(3) | ⊕⊕⊕⊖ <sup>1,2</sup><br><b>moderate</b> | <b>SMD: 1.23 [95% CI: 0.35, 2.11]</b>    |
| <b>Serum Calcium Levels</b>   | The mean serum calcium levels in the intervention groups was <b>0.40 standard deviations lower</b> (0.59 to 0.20 lower)            | 468<br>(1)  | ⊕⊕⊖⊖ <sup>1,2,3</sup><br><b>low</b>    | <b>SMD: -0.40 [95% CI: -0.59, -0.20]</b> |

**Multiple Micronutrient Fortification**

|                              |                                                                                                                         |              |                                        |                                       |
|------------------------------|-------------------------------------------------------------------------------------------------------------------------|--------------|----------------------------------------|---------------------------------------|
| <b>Hemoglobin Levels</b>     | The mean hemoglobin in the intervention groups was <b>0.75 standard deviations higher</b> (0.41 to 1.08 higher)         | 3554<br>(16) | ⊕⊕⊕⊖ <sup>1,2</sup><br><b>moderate</b> | <b>SMD: 0.75 [95% CI: 0.41, 1.08]</b> |
| <b>Serum Ferritin Levels</b> | The mean ferritin in the intervention groups was <b>0.37 standard deviations higher</b> (0.13 to 0.62 higher)           | 2539<br>(9)  | ⊕⊕⊖⊖ <sup>1,2,3</sup><br><b>low</b>    | <b>SMD: 0.37 [0.13, 0.62]</b>         |
| <b>Serum Zinc Levels</b>     | The mean zinc in the intervention groups was <b>0.08 standard deviations higher</b> (0.02 lower to 0.19 higher)         | 2821<br>(10) | ⊕⊕⊕⊖ <sup>1,2</sup><br><b>moderate</b> | <b>SMD: 0.08 [-0.02, 0.19]</b>        |
| <b>Serum Retinol Levels</b>  | The mean serum retinol in the intervention groups was <b>0.05 standard deviations lower</b> (0.23 lower to 0.13 higher) | 1927<br>(8)  | ⊕⊕⊖⊖ <sup>1,2,3</sup><br><b>low</b>    | <b>SMD: -0.05 [-0.23, 0.13]</b>       |

|                                       |                                                                                                                                    |                                      |              |                                     |                                         |
|---------------------------------------|------------------------------------------------------------------------------------------------------------------------------------|--------------------------------------|--------------|-------------------------------------|-----------------------------------------|
| <b>Effect on Anemia</b>               | Multiple Micronutrient fortification reduced risk of anemia by 45%                                                                 | <b>RR: 0.55 [95% CI: 0.42, 0.71]</b> | 4722<br>(13) | ⊕⊕⊖⊖ <sup>1,2,3</sup><br><b>low</b> |                                         |
| <b>Effect on Vitamin A deficiency</b> | Multiple Micronutrient fortification reduced risk of vitamin A deficiency by 10%                                                   | <b>RR: 0.90 [95% CI: 0.76, 1.06]</b> | 2036<br>(6)  | ⊕⊕⊖⊖ <sup>1,2,3</sup><br><b>low</b> | <b>RR: 0.90 [95% CI: 0.76, 1.06]</b>    |
| <b>Height-for-age Z Score</b>         | The mean height-for-age z score in the intervention groups was <b>0.13 standard deviations higher</b> (0.04 lower to 0.29 higher)  |                                      | 2092<br>(8)  | ⊕⊕⊖⊖ <sup>1,2,3</sup><br><b>low</b> | <b>SMD: 0.13 [95% CI: -0.04, 0.29]</b>  |
| <b>Weight-for-Age Z score</b>         | The mean weight-for-age z score in the intervention groups was <b>0.12 standard deviations lower</b> (0.43 lower to 0.2 higher)    |                                      | 1988<br>(7)  | ⊕⊕⊖⊖ <sup>1,2,3</sup><br><b>low</b> | <b>SMD: -0.12 [95% CI: -0.43, 0.20]</b> |
| <b>Weight-for-height Z Score</b>      | The mean weight-for-height z score in the intervention groups was <b>0.11 standard deviations lower</b> (0.4 lower to 0.17 higher) |                                      | 2098<br>(8)  | ⊕⊕⊖⊖ <sup>1,2,3</sup><br><b>low</b> | <b>SMD: -0.11 [95% CI: -0.40, 0.17]</b> |

**CI:** Confidence interval;

<sup>1</sup> Blinding of participants, personal and outcome assessment was not described or carried out in one or more of the studies

<sup>2</sup> Allocation concealment not carried out or discussed in one or more of the studies

<sup>3</sup> A large confidence interval noticed in the results that may account for imprecision in results

<sup>4</sup> An overall small sample size has been calculated

<sup>5</sup> A large unexplained/unaccounted drop out was observed in one of the studies

<sup>6</sup> A before-after study design was used

GRADE Working Group grades of evidence

**High quality:** Further research is very unlikely to change our confidence in the estimate of effect.

**Moderate quality:** Further research is likely to have an important impact on our confidence in the estimate of effect and may change the estimate.

**Low quality:** Further research is very likely to have an important impact on our confidence in the estimate of effect and is likely to change the estimate.

**Very low quality:** We are very uncertain about the estimate.



Table S2. Effect of food fortification with various micronutrients on health outcomes in women

| Outcomes                     | Illustrative comparative risks* [95% CI]                                                                               | Relative effect [95% CI]             | No of Participants (studies) | Quality of the evidence (GRADE)        | Comments                              |
|------------------------------|------------------------------------------------------------------------------------------------------------------------|--------------------------------------|------------------------------|----------------------------------------|---------------------------------------|
| <b>Iron Fortification</b>    |                                                                                                                        |                                      |                              |                                        |                                       |
| <b>Hemoglobin Levels</b>     | The mean hemoglobin levels in the intervention groups was <b>0.62 standard deviations higher</b> (0.36 to 0.89 higher) |                                      | 3223 (11)                    | ⊕⊕⊕⊖ <sup>1,2</sup><br><b>moderate</b> | <b>SMD: 0.62 [95% CI: 0.36, 0.89]</b> |
| <b>Serum Ferritin Levels</b> | The mean serum ferritin in the intervention groups was <b>0.41 standard deviations higher</b> (0.23 to 0.60 higher)    |                                      | 3009 (10)                    | ⊕⊕⊖⊖ <sup>1,2,4</sup><br><b>low</b>    | <b>SMD: 0.41 [95% CI: 0.23, 0.60]</b> |
| <b>Effect on Anemia</b>      | Iron fortification reduced the prevalence of anemia by 32%                                                             | <b>RR: 0.68 [95% CI: 0.49, 0.93]</b> | 1316 (4)                     | ⊕⊕⊖⊖ <sup>1,2,4</sup><br><b>low</b>    |                                       |
| <b>Folate Fortification</b>  |                                                                                                                        |                                      |                              |                                        |                                       |
| <b>Neural Tube Defect</b>    | Folate fortification reduced the incidence of neural tube defects by 33%                                               | <b>RR: 0.57 [95% CI: 0.45, 0.73]</b> | 62183 (8)                    | ⊕⊕⊕⊖ <sup>6</sup><br><b>moderate</b>   |                                       |
| <b>Spina Bifida</b>          | Folate fortification reduced the incidence of Spina Bifida by 36%                                                      | <b>RR: 0.64 [95% CI: 0.57, 0.71]</b> | 41392 (11)                   | ⊕⊕⊕⊖ <sup>6</sup><br><b>moderate</b>   |                                       |
| <b>Anencephaly</b>           | Folate fortification reduced the incidence of anencephaly by 24%                                                       | <b>RR: 0.76 [95% CI: 0.68, 0.85]</b> | 41261 (10)                   | ⊕⊕⊕⊖ <sup>6</sup><br><b>moderate</b>   |                                       |

|                                             |                                                                                                                                                                                                                                                                                                                                               |             |                                        |                                                                                                                                                |
|---------------------------------------------|-----------------------------------------------------------------------------------------------------------------------------------------------------------------------------------------------------------------------------------------------------------------------------------------------------------------------------------------------|-------------|----------------------------------------|------------------------------------------------------------------------------------------------------------------------------------------------|
| <b>Serum Folate Levels</b>                  | The mean serum alkaline phosphatase levels in the intervention groups was <b>1.38 standard deviations higher</b> (0.20 lower to 2.95 higher)                                                                                                                                                                                                  | 1239<br>(3) | ⊕⊕⊖⊖ <sup>4,6</sup><br><b>low</b>      | <b>SMD: 1.38 [95% CI: -0.20, 2.95]</b>                                                                                                         |
| <b>Iodine Fortification</b>                 |                                                                                                                                                                                                                                                                                                                                               |             |                                        |                                                                                                                                                |
| <b>Urinary iodine concentrations</b>        | The mean urinary iodine concentration in the intervention groups was <b>7.16 standard deviations higher</b> (1.00 to 13.31 higher)                                                                                                                                                                                                            | 2352<br>(4) | ⊕⊕⊕⊖ <sup>1,2</sup><br><b>moderate</b> | <b>SMD: 7.16 [95% CI: 1.00, 13.31]</b>                                                                                                         |
| <b>Calcium and Vitamin D fortification</b>  |                                                                                                                                                                                                                                                                                                                                               |             |                                        |                                                                                                                                                |
| <b>Serum PTH Levels</b>                     | The mean serum PTH levels of post-menopausal women in the intervention groups was <b>2.53 standard deviations lower</b> (4.42 to 0.65 lower)<br><br>The mean serum PTH levels of women of reproductive age in the intervention groups was <b>0.01 standard deviations lower</b> (0.32 to 0.30 lower)                                          | 398<br>(6)  | ⊕⊕⊖⊖ <sup>1,2,4</sup><br><b>low</b>    | <b>Post-menopausal women</b><br>SMD: -2.53 [95% CI: -4.42, -0.65]<br><br><b>Women of reproductive age</b><br>SMD: -0.01 [95% CI: -0.32, -0.30] |
| <b>Serum Vitamin D Levels</b>               | The mean serum vitamin D concentration of post-menopausal women in the intervention groups was <b>0.97 standard deviations higher</b> (0.18 lower to 2.13 higher)<br><br>The mean serum vitamin D concentration of women of reproductive age in the intervention groups was <b>1.10 standard deviations lower</b> (3.81 lower to 1.60 higher) | 416<br>(5)  | ⊕⊕⊕⊖ <sup>1,2</sup><br><b>moderate</b> | <b>Post-menopausal women</b><br>SMD: 0.97 [95% CI: -0.18, 2.13]<br><br><b>Women of reproductive age</b><br>SMD: -1.10 [95% CI: -3.81, 1.60]    |
| <b>Multiple Micronutrient Fortification</b> |                                                                                                                                                                                                                                                                                                                                               |             |                                        |                                                                                                                                                |

|                              |                                                                                                                   |                                      |             |                                        |                                       |
|------------------------------|-------------------------------------------------------------------------------------------------------------------|--------------------------------------|-------------|----------------------------------------|---------------------------------------|
| <b>Hemoglobin Levels</b>     | The mean hemoglobin in the intervention groups was <b>0.31 standard deviations higher</b> (0.13 to 0.48 higher)   |                                      | 516<br>(1)  | ⊕⊕⊕⊖ <sup>1,2</sup><br><b>moderate</b> | <b>SMD: 0.31 [95% CI: 0.13, 0.48]</b> |
| <b>Serum Ferritin Levels</b> | The mean ferritin in the intervention groups was <b>0.47 standard deviations higher</b> (0.36 to 0.58 higher)     |                                      | 1214<br>(2) | ⊕⊕⊕⊖ <sup>1,2</sup><br><b>moderate</b> | <b>SMD: 0.47 [95% CI: 0.36, 0.58]</b> |
| <b>Serum Zinc Levels</b>     | The mean zinc in the intervention groups was <b>0.50 standard deviations higher</b> (0.38 to 0.61 higher)         |                                      | 1214<br>(2) | ⊕⊕⊕⊖ <sup>1,2</sup><br><b>moderate</b> | <b>SMD: 0.50 [95% CI: 0.38, 0.61]</b> |
| <b>Serum Retinol Levels</b>  | The mean serum retinol in the intervention groups was <b>0.47 standard deviations lower</b> (0.30 to 0.65 higher) |                                      | 516<br>(1)  | ⊕⊕⊕⊖ <sup>1,2</sup><br><b>moderate</b> | <b>SMD: 0.47 [95% CI: 0.30, 0.65]</b> |
| <b>Effect on Anemia</b>      | Multiple micronutrient fortification reduced the prevalence of anemia by 24%                                      | <b>RR: 0.76 [95% CI: 0.48, 1.21]</b> | 516<br>(1)  | ⊕⊕⊕⊖ <sup>1,2</sup><br><b>moderate</b> |                                       |

CI: Confidence interval;

<sup>1</sup> Blinding of participants, personal and outcome assessment was not described or carried out in one or more of the studies

<sup>2</sup> Allocation concealment not carried out or discussed in one or more of the studies

<sup>3</sup> A large confidence interval noticed in the results that may account for imprecision in results

<sup>4</sup> An overall small sample size has been calculated

<sup>5</sup> A large unexplained/unaccounted drop out was observed in one of the studies

<sup>6</sup> A before-after study design was used

GRADE Working Group grades of evidence

**High quality:** Further research is very unlikely to change our confidence in the estimate of effect.

**Moderate quality:** Further research is likely to have an important impact on our confidence in the estimate of effect and may change the estimate.

**Low quality:** Further research is very likely to have an important impact on our confidence in the estimate of effect and is likely to change the estimate.

**Very low quality:** We are very uncertain about the estimate.
